# Supplementary material for: How you teach changes who you reach: understanding the effect of teaching modality on student engagement, content interest, and learning in undergraduate hydrology
Source: Copernicus journal article supplement (doi:10.5194/egusphere-2022-967), 2022-10-10
Supplement: Supplementary file 1 [file egusphere-2022-967-supplement.zip]

## HESS Supporting Information

Article title: How you teach changes who you reach: understanding the effect of teaching modality on student engagement, content interest, and learning in undergraduate hydrology

Authors: Georgakakos, C., Knighton, J.

Article acceptance date: [Click here to enter a date.](#)

The following Supporting Information is available for this article:

**Table S1:** Class activity data sheet

Date:

Number of students in class:

[illegible]

Notes:

**Table S2:** Classroom activity definitions

| Activity participant | Activity Code             | Definition                                                                                                                                                                                                                      |
|----------------------|---------------------------|---------------------------------------------------------------------------------------------------------------------------------------------------------------------------------------------------------------------------------|
| Instructor           | Lecture                   | Instructor communicates new content information while students listen and take notes.                                                                                                                                           |
|                      | Practice Problem          | Instructor gives an example problem to work through together in class                                                                                                                                                           |
|                      | Problem/assessment Review | Instructor reviews answers to problems already completed by the students on homework or assessments                                                                                                                             |
|                      | Projection                | Instructor uses non-slide projection to talk through new content, applications or site specificity (e.g. maps, model interfaces, database websites). Included in student <i>lecture</i> activity when directed to entire class. |
|                      | Slides                    | Instructor uses slides to introduce new content. Included in student <i>lecture</i> activity.                                                                                                                                   |
|                      | Whiteboard                | Instructor uses the whiteboard to introduce new content. Included in student <i>lecture</i> activity when directed toward the entire class.                                                                                     |
| Student              | Computer                  | Students work on their own computers either individually or in small groups.                                                                                                                                                    |
|                      | Group Student Work        | Students work together in small groups                                                                                                                                                                                          |
|                      | Indiv. Student Work       | Students work through tasks individually                                                                                                                                                                                        |
|                      | Lecture                   | Students listen and take notes while instructor lectures                                                                                                                                                                        |
|                      | Student Chatter           | Students talk amongst themselves                                                                                                                                                                                                |

**Table S3:** Student Survey Questionnaire

| Question Format                                                                                               | Survey Question                                                                                                                                                                                                                                                                                                                                                                                                                                   |
|---------------------------------------------------------------------------------------------------------------|---------------------------------------------------------------------------------------------------------------------------------------------------------------------------------------------------------------------------------------------------------------------------------------------------------------------------------------------------------------------------------------------------------------------------------------------------|
| Likert-style<br><br><i>(Strongly Agree, Agree, Neither Agree or Disagree, Somewhat Agree, Strongly Agree)</i> | 1) Please check the box that marks your agreement or disagreement with the following statements :<br>a. This module helped me understand the topic addressed.<br>b. My interest in watershed hydrology increased as a result of this lesson.<br>c. This module excited me about a career in watershed hydrology.<br>d. I would like to learn more in this area of watershed hydrology.<br>e. My group worked together effectively in this module. |
| Open-ended                                                                                                    | 2) What was the most interesting part of this module for you?<br>3) What was the least interesting part of this module for you?<br>4) If this lesson changed how you think about your future studies/career, please explain.<br>5) How did your group collaborate effectively in this module?<br>6) How could your group have improved collaboration in this module?                                                                              |
