# Supplementary material for: How you teach changes who you reach: understanding the effect of teaching modality on student engagement, content interest, and learning in undergraduate hydrology
Source: Copernicus journal article supplement (doi:10.5194/egusphere-2022-967), 2022-10-10
Supplement: Supplementary file 2 [file egusphere-2022-967-supplement.zip]

Archive with 7 entries (5 files):
- TAR_SupplementalInformation/
- TAR_SupplementalInformation/.DS_Store
- TAR_SupplementalInformation/TAR_SWMM_Model/
- TAR_SupplementalInformation/SI_092022.pdf
- TAR_SupplementalInformation/TAR_SWMM_Model/S10_Model_8.4.21.ini
- TAR_SupplementalInformation/TAR_SWMM_Model/S10_Model_8.4.21.inp
- TAR_SupplementalInformation/TAR_SWMM_Model/WinAirPort_ClimFile_11.19_to_5.21.txt
