# Supplementary material for: How you teach changes who you reach: understanding the effect of teaching modality on student engagement, content interest, and learning in undergraduate hydrology
Source: Copernicus journal article supplement (doi:10.5194/egusphere-2022-967), 2022-10-10
Supplement: Supplementary file 2 [file egusphere-2022-967-supplement.zip › TAR_SupplementalInformation/TAR_SWMM_Model/S10_Model_8.4.21.inp]

[TITLE]
;;Project Title/Notes

[OPTIONS]
;;Option             Value
FLOW_UNITS           CFS
INFILTRATION         GREEN_AMPT
FLOW_ROUTING         KINWAVE
LINK_OFFSETS         DEPTH
MIN_SLOPE            0
ALLOW_PONDING        YES
SKIP_STEADY_STATE    YES

IGNORE_RDII          YES
IGNORE_SNOWMELT      YES
START_DATE           11/01/2019
START_TIME           00:00:00
REPORT_START_DATE    11/21/2020
REPORT_START_TIME    00:00:00
END_DATE             03/27/2021
END_TIME             00:00:00
SWEEP_START          06/01
SWEEP_END            06/02
DRY_DAYS             0
REPORT_STEP          01:00:00
WET_STEP             00:01:00
DRY_STEP             01:00:00
ROUTING_STEP         0:00:30 
RULE_STEP            00:00:00

INERTIAL_DAMPING     PARTIAL
NORMAL_FLOW_LIMITED  BOTH
FORCE_MAIN_EQUATION  H-W
VARIABLE_STEP        0.75
LENGTHENING_STEP     20
MIN_SURFAREA         12.566
MAX_TRIALS           8
HEAD_TOLERANCE       0.005
SYS_FLOW_TOL         5
LAT_FLOW_TOL         5
MINIMUM_STEP         0.5
THREADS              4

[EVAPORATION]
;;Data Source    Parameters
;;-------------- ----------------
TEMPERATURE 
DRY_ONLY         NO

[TEMPERATURE]
;;Data Element     Values     
FILE               "WinAirPort_ClimFile_11.19_to_5.21.txt"
WINDSPEED FILE    
SNOWMELT           34 0.5 0.6 610 41.804 -11
ADC IMPERVIOUS     1.0 1.0 1.0 1.0 1.0 1.0 1.0 1.0 1.0 1.0
ADC PERVIOUS       1.0 1.0 1.0 1.0 1.0 1.0 1.0 1.0 1.0 1.0

[RAINGAGES]
;;Name           Format    Interval SCF      Source    
;;-------------- --------- ------ ------ ----------
RG1              VOLUME    0:15     1.0      TIMESERIES 11.19-5.21_15_min

[SUBCATCHMENTS]
;;Name           Rain Gage        Outlet           Area     %Imperv  Width    %Slope   CurbLen  SnowPack        
;;-------------- ---------------- ---------------- -------- -------- -------- -------- -------- ----------------
S1               RG1              CB1              5.786    49.75    1352.339 10.5     0        BaseSP          
S2               RG1              CB2              6.321    66.99    960.525  5.69     0        BaseSP          
S3               RG1              CB3              2.148    74.87    907.894  4.9      0        BaseSP          
S4               RG1              CB4              6.695    76.05    1897.952 5.37     0        BaseSP          
S5               RG1              CB5              8.171    35.92    1663.411 4.1      0        BaseSP          
S6               RG1              CB6              3.897    52.72    1787.371 24.45    0        BaseSP          
S7               RG1              CB7              3.542    60.4     646.008  9.07     0        BaseSP          
S8               RG1              CB8              8.596    67.34    3068.831 7.27     0        BaseSP          
S9               RG1              CB9              10.808   17.44    1625.82  5.35     0        BaseSP          
S10              RG1              CB10             25.893   8.7      2549.979 8.25     0        BaseSP          
S11              RG1              CB11             2.28     18.58    423.954  5.76     0        BaseSP          

[SUBAREAS]
;;Subcatchment   N-Imperv   N-Perv     S-Imperv   S-Perv     PctZero    RouteTo    PctRouted 
;;-------------- ---------- ---------- ---------- ---------- ---------- ---------- ----------
S1               0.013      0.075      0.1        0.35       0          OUTLET    
S2               0.013      0.05       0.1        0.35       0          OUTLET    
S3               0.013      0.05       0.1        0.35       0          OUTLET    
S4               0.013      0.05       0.1        0.35       0          OUTLET    
S5               0.013      0.075      0.1        0.35       0          OUTLET    
S6               0.013      0.075      0.1        0.35       0          OUTLET    
S7               0.013      0.075      0.1        0.35       0          OUTLET    
S8               0.013      0.075      0.1        0.35       0          OUTLET    
S9               0.013      0.09       0.05       0.35       0          OUTLET    
S10              0.013      0.09       0.05       0.35       0          OUTLET    
S11              0.013      0.075      0.1        0.35       0          OUTLET    

[INFILTRATION]
;;Subcatchment   Param1     Param2     Param3     Param4     Param5    
;;-------------- ---------- ---------- ---------- ---------- ----------
S1               3.50       0.13       0.434      7          0         
S2               3.50       0.13       0.434      7          0         
S3               3.50       0.13       0.434      7          0         
S4               3.50       0.13       0.434      7          0         
S5               3.50       0.13       0.434      7          0         
S6               3.50       0.13       0.434      7          0         
S7               3.50       0.13       0.434      7          0         
S8               3.50       0.13       0.434      7          0         
S9               4.33       0.43       0.412      7          0         
S10              4.33       0.43       0.412      7          0         
S11              3.50       0.13       0.434      7          0         

[LID_CONTROLS]
;;Name           Type/Layer Parameters
;;-------------- ---------- ----------
UConn_RainGarden RG
UConn_RainGarden SURFACE    12         0.4        0.1        1.0        5         
UConn_RainGarden SOIL       12         0.5        0.2        0.1        0.5        10.0       3.5       
UConn_RainGarden STORAGE    0          0.75       0.5        0         

[LID_USAGE]
;;Subcatchment   LID Process      Number  Area       Width      InitSat    FromImp    ToPerv     RptFile                  DrainTo          FromPerv  
;;-------------- ---------------- ------- ---------- ---------- ---------- ---------- ---------- ------------------------ ---------------- ----------
S1               UConn_RainGarden 1       100        0          0          100        0          *                        *                0               
S2               UConn_RainGarden 1       100        0          0          100        0          *                        *                0               
S3               UConn_RainGarden 1       100        0          0          100        0          *                        *                0               
S4               UConn_RainGarden 1       100        0          0          100        0          *                        *                0               
S5               UConn_RainGarden 1       100        0          0          100        0          *                        *                0               
S6               UConn_RainGarden 1       100        0          0          100        0          *                        *                0               
S7               UConn_RainGarden 1       100        0          0          100        0          *                        *                0               
S8               UConn_RainGarden 1       100        0          0          100        0          *                        *                0               
S9               UConn_RainGarden 1       100        0          0          100        0          *                        *                0               
S10              UConn_RainGarden 1       100        0          0          100        0          *                        *                0               
S11              UConn_RainGarden 1       100        0          0          100        0          *                        *                0               

[SNOWPACKS]
;;Name           Surface    Parameters
;;-------------- ---------- ----------
BaseSP           PLOWABLE   0.001      0.001      32.0       0.10       0.00       0.00       0.71      
BaseSP           IMPERVIOUS 0.001      0.001      32.0       0.10       0.00       0.00       0.00      
BaseSP           PERVIOUS   0.001      0.001      32.0       0.10       0.00       0.00       0.00      
BaseSP           REMOVAL    1.0        0.0        0.0        0.0        0.0        0.0        

[JUNCTIONS]
;;Name           Elevation  MaxDepth   InitDepth  SurDepth   Aponded   
;;-------------- ---------- ---------- ---------- ---------- ----------
CB1              605.11     0          0          0          0         
CB2              600.103    0          0          0          0         
CB3              602.7      0          0          0          0         
CB4              605.637    0          0          0          0         
CB5              609.817    0          0          0          0         
CB6              614.067    0          0          0          0         
CB7              610.537    0          0          0          0         
CB8              631.34     0          0          0          0         
CB9              636.727    0          0          0          0         
CB10             624.95     0          0          0          0         
DB1              589.307    0          0          0          0         
MH1              600.103    0          0          0          0         
MH2              605.747    0          0          0          0         
CB11             592.823    0          0          0          0         
MH3              590.88     0          0          0          0         

[OUTFALLS]
;;Name           Elevation  Type       Stage Data       Gated    Route To        
;;-------------- ---------- ---------- ---------------- -------- ----------------
OF               585.35     FREE                        NO                       

[CONDUITS]
;;Name           From Node        To Node          Length     Roughness  InOffset   OutOffset  InitFlow   MaxFlow   
;;-------------- ---------------- ---------------- ---------- ---------- ---------- ---------- ---------- ----------
;Reinforced Concrete
C1               CB1              MH3              463        0.015      0          0          0          0         
;Concrete
C2               MH1              MH3              642        0.015      0          0          0          0         
;Concrete
C3               CB2              MH1              141        0.015      1.417      0.334      0          0         
;Concrete
C4               CB3              MH1              20         0.015      0          2          0          0         
;Concrete
C5               MH2              MH1              206        0.015      0          2          0          0         
;Concrete
C6               CB4              MH2              68         0.015      2.166      1.416      0          0         
;Concrete
C7               CB5              MH2              199        0.015      0          0.25       0          0         
;Concrete
C8               CB6              CB5              68         0.015      1.916      5.083      0          0         
;Concrete
C9               CB7              MH2              145        0.015      0.25       0.333      0          0         
;Concrete
C10              CB8              CB7              489        0.015      1.167      0.25       0          0         
;Concrete
C11              CB9              CB8              283        0.015      1.583      1.25       0          0         
;Concrete
C12              CB10             CB5              750        0.015      0          8.333      0          0         
;Concrete
C13              DB1              OF               196        0.015      0.666      0          0          0         
;Vitrified Clay
C14              CB11             DB1              75         0.015      0.75       0          0          0         
;Concrete
C15              MH3              DB1              110        0.015      0          0.666      0          0         

[XSECTIONS]
;;Link           Shape        Geom1            Geom2      Geom3      Geom4      Barrels    Culvert   
;;-------------- ------------ ---------------- ---------- ---------- ---------- ---------- ----------
C1               Circular     1.5              1          0          0          1                    
C2               Circular     3.5              1          0          0          1                    
C3               Circular     1.5              1          0          0          1                    
C4               Circular     2                1          0          0          1                    
C5               Circular     3.5              1          0          0          1                    
C6               Circular     1.25             1          0          0          1                    
C7               Circular     3                1          0          0          1                    
C8               Circular     1.25             1          0          0          1                    
C9               Circular     2                1          0          0          1                    
C10              Circular     2                1          0          0          1                    
C11              Circular     2                1          0          0          1                    
C12              Circular     3                1          0          0          1                    
C13              Circular     4                1          0          0          1                    
C14              Circular     0.67             1          0          0          1                    
C15              Circular     4                1          0          0          1                    

[CONTROLS]
;;Control Rules


[POLLUTANTS]
;;Name           Units  Crain      Cgw        Crdii      Kdecay     SnowOnly   Co-Pollutant     Co-Frac    Cdwf       Cinit     
;;-------------- ------ ---------- ---------- ---------- ---------- ---------- ---------------- ---------- ---------- ----------
Cl_Concentration MG/L   0          0.0        700        0.0        NO         *                0.0        0          0.0       

[LANDUSES]
;;               Sweeping   Fraction   Last      
;;Name           Interval   Available  Swept     
;;-------------- ---------- ---------- ----------
;Areas that road salt is applied prior to snow events
Deicing_Areas    0          0          0         

[COVERAGES]
;;Subcatchment   Land Use         Percent   
;;-------------- ---------------- ----------
S1               Deicing_Areas    25.63     
S2               Deicing_Areas    55.34     
S3               Deicing_Areas    42.61     
S4               Deicing_Areas    29.71     
S5               Deicing_Areas    23.06     
S6               Deicing_Areas    36.40     
S7               Deicing_Areas    48.58     
S8               Deicing_Areas    49.45     
S9               Deicing_Areas    12.91     
S10              Deicing_Areas    5.74      
S11              Deicing_Areas    18.55     

[LOADINGS]
;;Subcatchment   Pollutant        Buildup   
;;-------------- ---------------- ----------

[BUILDUP]
;;Land Use       Pollutant        Function   Coeff1     Coeff2     Coeff3     Per Unit  
;;-------------- ---------------- ---------- ---------- ---------- ---------- ----------
Deicing_Areas    Cl_Concentration EXT        1245       1          Road_Salt_App AREA      

[WASHOFF]
;;Land Use       Pollutant        Function   Coeff1     Coeff2     SweepRmvl  BmpRmvl   
;;-------------- ---------------- ---------- ---------- ---------- ---------- ----------
Deicing_Areas    Cl_Concentration EXP        .45        .9         0.0        0.0       

[INFLOWS]
;;Node           Constituent      Time Series      Type     Mfactor  Sfactor  Baseline Pattern
;;-------------- ---------------- ---------------- -------- -------- -------- -------- --------
CB1              FLOW             Spaceholder      FLOW     1.0      1.0      .04      TEST    
CB1              Cl_Concentration Spaceholder      CONCEN   5.25     1.0      150      TEST2   
CB9              FLOW             Spaceholder      FLOW     1.0      1.0      .04      TEST    
CB9              Cl_Concentration Spaceholder      CONCEN   5.25     1.0      150      TEST2   
CB10             FLOW             Spaceholder      FLOW     1.0      1.0      .04      TEST    
CB10             Cl_Concentration Spaceholder      CONCEN   5.25     1.0      150      TEST2   

[HYDROGRAPHS]
;;Hydrograph     Rain Gage/Month  Response R        T        K        Dmax     Drecov   Dinit   
;;-------------- ---------------- -------- -------- -------- -------- -------- -------- --------
UH_Test          RG1             
UH_Test          All              Short    0.05     0.5      3        1        1        1       
UH_Test          All              Medium   0.1      1        5        1        1        1       
UH_Test          All              Long     0.2      5        10       1        1        1       


[RDII]
;;Node           Unit Hydrograph  Sewer Area
;;-------------- ---------------- ----------
CB1              UH_Test          16.5353   
CB9              UH_Test          22.9459   
CB10             UH_Test          44.6550   

[TIMESERIES]
;;Name           Date       Time       Value     
;;-------------- ---------- ---------- ----------
;spaceholder for direct flow
Spaceholder      11/1/2019  12:00      0         
Spaceholder      11/2/2019  12:00      0         
Spaceholder      11/3/2019  12:00      0         
Spaceholder      11/4/2019  12:00      0         
Spaceholder      11/5/2019  12:00      0         
Spaceholder      11/6/2019  12:00      0         
Spaceholder      11/7/2019  12:00      0         
Spaceholder      11/8/2019  12:00      0         
Spaceholder      11/9/2019  12:00      0         
Spaceholder      11/10/2019 12:00      0         
Spaceholder      11/11/2019 12:00      0         
Spaceholder      11/12/2019 12:00      0         
Spaceholder      11/13/2019 12:00      0         
Spaceholder      11/14/2019 12:00      0         
Spaceholder      11/15/2019 12:00      0         
Spaceholder      11/16/2019 12:00      0         
Spaceholder      11/17/2019 12:00      0         
Spaceholder      11/18/2019 12:00      0         
Spaceholder      11/19/2019 12:00      0         
Spaceholder      11/20/2019 12:00      0         
Spaceholder      11/21/2019 12:00      0         
Spaceholder      11/22/2019 12:00      0         
Spaceholder      11/23/2019 12:00      0         
Spaceholder      11/24/2019 12:00      0         
Spaceholder      11/25/2019 12:00      0         
Spaceholder      11/26/2019 12:00      0         
Spaceholder      11/27/2019 12:00      0         
Spaceholder      11/28/2019 12:00      0         
Spaceholder      11/29/2019 12:00      0         
Spaceholder      11/30/2019 12:00      0         
Spaceholder      12/1/2019  12:00      0         
Spaceholder      12/2/2019  12:00      0         
Spaceholder      12/3/2019  12:00      0         
Spaceholder      12/4/2019  12:00      0         
Spaceholder      12/5/2019  12:00      0         
Spaceholder      12/6/2019  12:00      0         
Spaceholder      12/7/2019  12:00      0         
Spaceholder      12/8/2019  12:00      0         
Spaceholder      12/9/2019  12:00      0         
Spaceholder      12/10/2019 12:00      0         
Spaceholder      12/11/2019 12:00      0         
Spaceholder      12/12/2019 12:00      0         
Spaceholder      12/13/2019 12:00      0         
Spaceholder      12/14/2019 12:00      0         
Spaceholder      12/15/2019 12:00      0         
Spaceholder      12/16/2019 12:00      0         
Spaceholder      12/17/2019 12:00      0         
Spaceholder      12/18/2019 12:00      0         
Spaceholder      12/19/2019 12:00      0         
Spaceholder      12/20/2019 12:00      0         
Spaceholder      12/21/2019 12:00      0         
Spaceholder      12/22/2019 12:00      0         
Spaceholder      12/23/2019 12:00      0         
Spaceholder      12/24/2019 12:00      0         
Spaceholder      12/25/2019 12:00      0         
Spaceholder      12/26/2019 12:00      0         
Spaceholder      12/27/2019 12:00      0         
Spaceholder      12/28/2019 12:00      0         
Spaceholder      12/29/2019 12:00      0         
Spaceholder      12/30/2019 12:00      0         
Spaceholder      12/31/2019 12:00      0         
Spaceholder      1/1/2020   12:00      0         
Spaceholder      1/2/2020   12:00      0         
Spaceholder      1/3/2020   12:00      0         
Spaceholder      1/4/2020   12:00      0         
Spaceholder      1/5/2020   12:00      0         
Spaceholder      1/6/2020   12:00      0         
Spaceholder      1/7/2020   12:00      0         
Spaceholder      1/8/2020   12:00      0         
Spaceholder      1/9/2020   12:00      0         
Spaceholder      1/10/2020  12:00      0         
Spaceholder      1/11/2020  12:00      0         
Spaceholder      1/12/2020  12:00      0         
Spaceholder      1/13/2020  12:00      0         
Spaceholder      1/14/2020  12:00      0         
Spaceholder      1/15/2020  12:00      0         
Spaceholder      1/16/2020  12:00      0         
Spaceholder      1/17/2020  12:00      0         
Spaceholder      1/18/2020  12:00      0         
Spaceholder      1/19/2020  12:00      0         
Spaceholder      1/20/2020  12:00      0         
Spaceholder      1/21/2020  12:00      0         
Spaceholder      1/22/2020  12:00      0         
Spaceholder      1/23/2020  12:00      0         
Spaceholder      1/24/2020  12:00      0         
Spaceholder      1/25/2020  12:00      0         
Spaceholder      1/26/2020  12:00      0         
Spaceholder      1/27/2020  12:00      0         
Spaceholder      1/28/2020  12:00      0         
Spaceholder      1/29/2020  12:00      0         
Spaceholder      1/30/2020  12:00      0         
Spaceholder      1/31/2020  12:00      0         
Spaceholder      2/1/2020   12:00      0         
Spaceholder      2/2/2020   12:00      0         
Spaceholder      2/3/2020   12:00      0         
Spaceholder      2/4/2020   12:00      0         
Spaceholder      2/5/2020   12:00      0         
Spaceholder      2/6/2020   12:00      0         
Spaceholder      2/7/2020   12:00      0         
Spaceholder      2/8/2020   12:00      0         
Spaceholder      2/9/2020   12:00      0         
Spaceholder      2/10/2020  12:00      0         
Spaceholder      2/11/2020  12:00      0         
Spaceholder      2/12/2020  12:00      0         
Spaceholder      2/13/2020  12:00      0         
Spaceholder      2/14/2020  12:00      0         
Spaceholder      2/15/2020  12:00      0         
Spaceholder      2/16/2020  12:00      0         
Spaceholder      2/17/2020  12:00      0         
Spaceholder      2/18/2020  12:00      0         
Spaceholder      2/19/2020  12:00      0         
Spaceholder      2/20/2020  12:00      0         
Spaceholder      2/21/2020  12:00      0         
Spaceholder      2/22/2020  12:00      0         
Spaceholder      2/23/2020  12:00      0         
Spaceholder      2/24/2020  12:00      0         
Spaceholder      2/25/2020  12:00      0         
Spaceholder      2/26/2020  12:00      0         
Spaceholder      2/27/2020  12:00      0         
Spaceholder      2/28/2020  12:00      0         
Spaceholder      2/29/2020  12:00      0         
Spaceholder      3/1/2020   12:00      0         
Spaceholder      3/2/2020   12:00      0         
Spaceholder      3/3/2020   12:00      0         
Spaceholder      3/4/2020   12:00      0         
Spaceholder      3/5/2020   12:00      0         
Spaceholder      3/6/2020   12:00      0         
Spaceholder      3/7/2020   12:00      0         
Spaceholder      3/8/2020   12:00      0         
Spaceholder      3/9/2020   12:00      0         
Spaceholder      3/10/2020  12:00      0         
Spaceholder      3/11/2020  12:00      0         
Spaceholder      3/12/2020  12:00      0         
Spaceholder      3/13/2020  12:00      0         
Spaceholder      3/14/2020  12:00      0         
Spaceholder      3/15/2020  12:00      0         
Spaceholder      3/16/2020  12:00      0         
Spaceholder      3/17/2020  12:00      0         
Spaceholder      3/18/2020  12:00      0         
Spaceholder      3/19/2020  12:00      0         
Spaceholder      3/20/2020  12:00      0         
Spaceholder      3/21/2020  12:00      0         
Spaceholder      3/22/2020  12:00      0         
Spaceholder      3/23/2020  12:00      0         
Spaceholder      3/24/2020  12:00      0         
Spaceholder      3/25/2020  12:00      0         
Spaceholder      3/26/2020  12:00      0         
Spaceholder      3/27/2020  12:00      0         
Spaceholder      3/28/2020  12:00      0         
Spaceholder      3/29/2020  12:00      0         
Spaceholder      3/30/2020  12:00      0         
Spaceholder      3/31/2020  12:00      0         
Spaceholder      4/1/2020   12:00      0         
Spaceholder      4/2/2020   12:00      0         
Spaceholder      4/3/2020   12:00      0         
Spaceholder      4/4/2020   12:00      0         
Spaceholder      4/5/2020   12:00      0         
Spaceholder      4/6/2020   12:00      0         
Spaceholder      4/7/2020   12:00      0         
Spaceholder      4/8/2020   12:00      0         
Spaceholder      4/9/2020   12:00      0         
Spaceholder      4/10/2020  12:00      0         
Spaceholder      4/11/2020  12:00      0         
Spaceholder      4/12/2020  12:00      0         
Spaceholder      4/13/2020  12:00      0         
Spaceholder      4/14/2020  12:00      0         
Spaceholder      4/15/2020  12:00      0         
Spaceholder      4/16/2020  12:00      0         
Spaceholder      4/17/2020  12:00      0         
Spaceholder      4/18/2020  12:00      0         
Spaceholder      4/19/2020  12:00      0         
Spaceholder      4/20/2020  12:00      0         
Spaceholder      4/21/2020  12:00      0         
Spaceholder      4/22/2020  12:00      0         
Spaceholder      4/23/2020  12:00      0         
Spaceholder      4/24/2020  12:00      0         
Spaceholder      4/25/2020  12:00      0         
Spaceholder      4/26/2020  12:00      0         
Spaceholder      4/27/2020  12:00      0         
Spaceholder      4/28/2020  12:00      0         
Spaceholder      4/29/2020  12:00      0         
Spaceholder      4/30/2020  12:00      0         
Spaceholder      5/1/2020   12:00      0         
Spaceholder      5/2/2020   12:00      0         
Spaceholder      5/3/2020   12:00      0         
Spaceholder      5/4/2020   12:00      0         
Spaceholder      5/5/2020   12:00      0         
Spaceholder      5/6/2020   12:00      0         
Spaceholder      5/7/2020   12:00      0         
Spaceholder      5/8/2020   12:00      0         
Spaceholder      5/9/2020   12:00      0         
Spaceholder      5/10/2020  12:00      0         
Spaceholder      5/11/2020  12:00      0         
Spaceholder      5/12/2020  12:00      0         
Spaceholder      5/13/2020  12:00      0         
Spaceholder      5/14/2020  12:00      0         
Spaceholder      5/15/2020  12:00      0         
Spaceholder      5/16/2020  12:00      0         
Spaceholder      5/17/2020  12:00      0         
Spaceholder      5/18/2020  12:00      0         
Spaceholder      5/19/2020  12:00      0         
Spaceholder      5/20/2020  12:00      0         
Spaceholder      5/21/2020  12:00      0         
Spaceholder      5/22/2020  12:00      0         
Spaceholder      5/23/2020  12:00      0         
Spaceholder      5/24/2020  12:00      0         
Spaceholder      5/25/2020  12:00      0         
Spaceholder      5/26/2020  12:00      0         
Spaceholder      5/27/2020  12:00      0         
Spaceholder      5/28/2020  12:00      0         
Spaceholder      5/29/2020  12:00      0         
Spaceholder      5/30/2020  12:00      0         
Spaceholder      5/31/2020  12:00      0         
Spaceholder      6/1/2020   12:00      0         
Spaceholder      6/2/2020   12:00      0         
Spaceholder      6/3/2020   12:00      0         
Spaceholder      6/4/2020   12:00      0         
Spaceholder      6/5/2020   12:00      0         
Spaceholder      6/6/2020   12:00      0         
Spaceholder      6/7/2020   12:00      0         
Spaceholder      6/8/2020   12:00      0         
Spaceholder      6/9/2020   12:00      0         
Spaceholder      6/10/2020  12:00      0         
Spaceholder      6/11/2020  12:00      0         
Spaceholder      6/12/2020  12:00      0         
Spaceholder      6/13/2020  12:00      0         
Spaceholder      6/14/2020  12:00      0         
Spaceholder      6/15/2020  12:00      0         
Spaceholder      6/16/2020  12:00      0         
Spaceholder      6/17/2020  12:00      0         
Spaceholder      6/18/2020  12:00      0         
Spaceholder      6/19/2020  12:00      0         
Spaceholder      6/20/2020  12:00      0         
Spaceholder      6/21/2020  12:00      0         
Spaceholder      6/22/2020  12:00      0         
Spaceholder      6/23/2020  12:00      0         
Spaceholder      6/24/2020  12:00      0         
Spaceholder      6/25/2020  12:00      0         
Spaceholder      6/26/2020  12:00      0         
Spaceholder      6/27/2020  12:00      0         
Spaceholder      6/28/2020  12:00      0         
Spaceholder      6/29/2020  12:00      0         
Spaceholder      6/30/2020  12:00      0         
Spaceholder      7/1/2020   12:00      0         
Spaceholder      7/2/2020   12:00      0         
Spaceholder      7/3/2020   12:00      0         
Spaceholder      7/4/2020   12:00      0         
Spaceholder      7/5/2020   12:00      0         
Spaceholder      7/6/2020   12:00      0         
Spaceholder      7/7/2020   12:00      0         
Spaceholder      7/8/2020   12:00      0         
Spaceholder      7/9/2020   12:00      0         
Spaceholder      7/10/2020  12:00      0         
Spaceholder      7/11/2020  12:00      0         
Spaceholder      7/12/2020  12:00      0         
Spaceholder      7/13/2020  12:00      0         
Spaceholder      7/14/2020  12:00      0         
Spaceholder      7/15/2020  12:00      0         
Spaceholder      7/16/2020  12:00      0         
Spaceholder      7/17/2020  12:00      0         
Spaceholder      7/18/2020  12:00      0         
Spaceholder      7/19/2020  12:00      0         
Spaceholder      7/20/2020  12:00      0         
Spaceholder      7/21/2020  12:00      0         
Spaceholder      7/22/2020  12:00      0         
Spaceholder      7/23/2020  12:00      0         
Spaceholder      7/24/2020  12:00      0         
Spaceholder      7/25/2020  12:00      0         
Spaceholder      7/26/2020  12:00      0         
Spaceholder      7/27/2020  12:00      0         
Spaceholder      7/28/2020  12:00      0         
Spaceholder      7/29/2020  12:00      0         
Spaceholder      7/30/2020  12:00      0         
Spaceholder      7/31/2020  12:00      0         
Spaceholder      8/1/2020   12:00      0         
Spaceholder      8/2/2020   12:00      0         
Spaceholder      8/3/2020   12:00      0         
Spaceholder      8/4/2020   12:00      0         
Spaceholder      8/5/2020   12:00      0         
Spaceholder      8/6/2020   12:00      0         
Spaceholder      8/7/2020   12:00      0         
Spaceholder      8/8/2020   12:00      0         
Spaceholder      8/9/2020   12:00      0         
Spaceholder      8/10/2020  12:00      0         
Spaceholder      8/11/2020  12:00      0         
Spaceholder      8/12/2020  12:00      0         
Spaceholder      8/13/2020  12:00      0         
Spaceholder      8/14/2020  12:00      0         
Spaceholder      8/15/2020  12:00      0         
Spaceholder      8/16/2020  12:00      0         
Spaceholder      8/17/2020  12:00      0         
Spaceholder      8/18/2020  12:00      0         
Spaceholder      8/19/2020  12:00      0         
Spaceholder      8/20/2020  12:00      0         
Spaceholder      8/21/2020  12:00      0         
Spaceholder      8/22/2020  12:00      0         
Spaceholder      8/23/2020  12:00      0         
Spaceholder      8/24/2020  12:00      0         
Spaceholder      8/25/2020  12:00      0         
Spaceholder      8/26/2020  12:00      0         
Spaceholder      8/27/2020  12:00      0         
Spaceholder      8/28/2020  12:00      0         
Spaceholder      8/29/2020  12:00      0         
Spaceholder      8/30/2020  12:00      0         
Spaceholder      8/31/2020  12:00      0         
Spaceholder      9/1/2020   12:00      0         
Spaceholder      9/2/2020   12:00      0         
Spaceholder      9/3/2020   12:00      0         
Spaceholder      9/4/2020   12:00      0         
Spaceholder      9/5/2020   12:00      0         
Spaceholder      9/6/2020   12:00      0         
Spaceholder      9/7/2020   12:00      0         
Spaceholder      9/8/2020   12:00      0         
Spaceholder      9/9/2020   12:00      0         
Spaceholder      9/10/2020  12:00      0         
Spaceholder      9/11/2020  12:00      0         
Spaceholder      9/12/2020  12:00      0         
Spaceholder      9/13/2020  12:00      0         
Spaceholder      9/14/2020  12:00      0         
Spaceholder      9/15/2020  12:00      0         
Spaceholder      9/16/2020  12:00      0         
Spaceholder      9/17/2020  12:00      0         
Spaceholder      9/18/2020  12:00      0         
Spaceholder      9/19/2020  12:00      0         
Spaceholder      9/20/2020  12:00      0         
Spaceholder      9/21/2020  12:00      0         
Spaceholder      9/22/2020  12:00      0         
Spaceholder      9/23/2020  12:00      0         
Spaceholder      9/24/2020  12:00      0         
Spaceholder      9/25/2020  12:00      0         
Spaceholder      9/26/2020  12:00      0         
Spaceholder      9/27/2020  12:00      0         
Spaceholder      9/28/2020  12:00      0         
Spaceholder      9/29/2020  12:00      0         
Spaceholder      9/30/2020  12:00      0         
Spaceholder      10/1/2020  12:00      0         
Spaceholder      10/2/2020  12:00      0         
Spaceholder      10/3/2020  12:00      0         
Spaceholder      10/4/2020  12:00      0         
Spaceholder      10/5/2020  12:00      0         
Spaceholder      10/6/2020  12:00      0         
Spaceholder      10/7/2020  12:00      0         
Spaceholder      10/8/2020  12:00      0         
Spaceholder      10/9/2020  12:00      0         
Spaceholder      10/10/2020 12:00      0         
Spaceholder      10/11/2020 12:00      0         
Spaceholder      10/12/2020 12:00      0         
Spaceholder      10/13/2020 12:00      0         
Spaceholder      10/14/2020 12:00      0         
Spaceholder      10/15/2020 12:00      0         
Spaceholder      10/16/2020 12:00      0         
Spaceholder      10/17/2020 12:00      0         
Spaceholder      10/18/2020 12:00      0         
Spaceholder      10/19/2020 12:00      0         
Spaceholder      10/20/2020 12:00      0         
Spaceholder      10/21/2020 12:00      0         
Spaceholder      10/22/2020 12:00      0         
Spaceholder      10/23/2020 12:00      0         
Spaceholder      10/24/2020 12:00      0         
Spaceholder      10/25/2020 12:00      0         
Spaceholder      10/26/2020 12:00      0         
Spaceholder      10/27/2020 12:00      0         
Spaceholder      10/28/2020 12:00      0         
Spaceholder      10/29/2020 12:00      0         
Spaceholder      10/30/2020 12:00      0         
Spaceholder      10/31/2020 12:00      0         
Spaceholder      11/1/2020  12:00      0         
Spaceholder      11/2/2020  12:00      0         
Spaceholder      11/3/2020  12:00      0         
Spaceholder      11/4/2020  12:00      0         
Spaceholder      11/5/2020  12:00      0         
Spaceholder      11/6/2020  12:00      0         
Spaceholder      11/7/2020  12:00      0         
Spaceholder      11/8/2020  12:00      0         
Spaceholder      11/9/2020  12:00      0         
Spaceholder      11/10/2020 12:00      0         
Spaceholder      11/11/2020 12:00      0         
Spaceholder      11/12/2020 12:00      0         
Spaceholder      11/13/2020 12:00      0         
Spaceholder      11/14/2020 12:00      0         
Spaceholder      11/15/2020 12:00      0         
Spaceholder      11/16/2020 12:00      0         
Spaceholder      11/17/2020 12:00      0         
Spaceholder      11/18/2020 12:00      0         
Spaceholder      11/19/2020 12:00      0         
Spaceholder      11/20/2020 12:00      0         
Spaceholder      11/21/2020 12:00      0         
Spaceholder      11/22/2020 12:00      0         
Spaceholder      11/23/2020 12:00      0         
Spaceholder      11/24/2020 12:00      0         
Spaceholder      11/25/2020 12:00      0         
Spaceholder      11/26/2020 12:00      0         
Spaceholder      11/27/2020 12:00      0         
Spaceholder      11/28/2020 12:00      0         
Spaceholder      11/29/2020 12:00      0         
Spaceholder      11/30/2020 12:00      0         
Spaceholder      12/1/2020  12:00      0         
Spaceholder      12/2/2020  12:00      0         
Spaceholder      12/3/2020  12:00      0         
Spaceholder      12/4/2020  12:00      0         
Spaceholder      12/5/2020  12:00      0         
Spaceholder      12/6/2020  12:00      0         
Spaceholder      12/7/2020  12:00      0         
Spaceholder      12/8/2020  12:00      0         
Spaceholder      12/9/2020  12:00      0         
Spaceholder      12/10/2020 12:00      0         
Spaceholder      12/11/2020 12:00      0         
Spaceholder      12/12/2020 12:00      0         
Spaceholder      12/13/2020 12:00      0         
Spaceholder      12/14/2020 12:00      0         
Spaceholder      12/15/2020 12:00      0         
Spaceholder      12/16/2020 12:00      0         
Spaceholder      12/17/2020 12:00      0         
Spaceholder      12/18/2020 12:00      0         
Spaceholder      12/19/2020 12:00      0         
Spaceholder      12/20/2020 12:00      0         
Spaceholder      12/21/2020 12:00      0         
Spaceholder      12/22/2020 12:00      0         
Spaceholder      12/23/2020 12:00      0         
Spaceholder      12/24/2020 12:00      0         
Spaceholder      12/25/2020 12:00      0         
Spaceholder      12/26/2020 12:00      0         
Spaceholder      12/27/2020 12:00      0         
Spaceholder      12/28/2020 12:00      0         
Spaceholder      12/29/2020 12:00      0         
Spaceholder      12/30/2020 12:00      0         
Spaceholder      12/31/2020 12:00      0         
Spaceholder      1/1/2021   12:00      0         
Spaceholder      1/2/2021   12:00      0         
Spaceholder      1/3/2021   12:00      0         
Spaceholder      1/4/2021   12:00      0         
Spaceholder      1/5/2021   12:00      0         
Spaceholder      1/6/2021   12:00      0         
Spaceholder      1/7/2021   12:00      0         
Spaceholder      1/8/2021   12:00      0         
Spaceholder      1/9/2021   12:00      0         
Spaceholder      1/10/2021  12:00      0         
Spaceholder      1/11/2021  12:00      0         
Spaceholder      1/12/2021  12:00      0         
Spaceholder      1/13/2021  12:00      0         
Spaceholder      1/14/2021  12:00      0         
Spaceholder      1/15/2021  12:00      0         
Spaceholder      1/16/2021  12:00      0         
Spaceholder      1/17/2021  12:00      0         
Spaceholder      1/18/2021  12:00      0         
Spaceholder      1/19/2021  12:00      0         
Spaceholder      1/20/2021  12:00      0         
Spaceholder      1/21/2021  12:00      0         
Spaceholder      1/22/2021  12:00      0         
Spaceholder      1/23/2021  12:00      0         
Spaceholder      1/24/2021  12:00      0         
Spaceholder      1/25/2021  12:00      0         
Spaceholder      1/26/2021  12:00      0         
Spaceholder      1/27/2021  12:00      0         
Spaceholder      1/28/2021  12:00      0         
Spaceholder      1/29/2021  12:00      0         
Spaceholder      1/30/2021  12:00      0         
Spaceholder      1/31/2021  12:00      0         
Spaceholder      2/1/2021   12:00      0         
Spaceholder      2/2/2021   12:00      0         
Spaceholder      2/3/2021   12:00      0         
Spaceholder      2/4/2021   12:00      0         
Spaceholder      2/5/2021   12:00      0         
Spaceholder      2/6/2021   12:00      0         
Spaceholder      2/7/2021   12:00      0         
Spaceholder      2/8/2021   12:00      0         
Spaceholder      2/9/2021   12:00      0         
Spaceholder      2/10/2021  12:00      0         
Spaceholder      2/11/2021  12:00      0         
Spaceholder      2/12/2021  12:00      0         
Spaceholder      2/13/2021  12:00      0         
Spaceholder      2/14/2021  12:00      0         
Spaceholder      2/15/2021  12:00      0         
Spaceholder      2/16/2021  12:00      0         
Spaceholder      2/17/2021  12:00      0         
Spaceholder      2/18/2021  12:00      0         
Spaceholder      2/19/2021  12:00      0         
Spaceholder      2/20/2021  12:00      0         
Spaceholder      2/21/2021  12:00      0         
Spaceholder      2/22/2021  12:00      0         
Spaceholder      2/23/2021  12:00      0         
Spaceholder      2/24/2021  12:00      0         
Spaceholder      2/25/2021  12:00      0         
Spaceholder      2/26/2021  12:00      0         
Spaceholder      2/27/2021  12:00      0         
Spaceholder      2/28/2021  12:00      0         
Spaceholder      3/1/2021   12:00      0         
Spaceholder      3/2/2021   12:00      0         
Spaceholder      3/3/2021   12:00      0         
Spaceholder      3/4/2021   12:00      0         
Spaceholder      3/5/2021   12:00      0         
Spaceholder      3/6/2021   12:00      0         
Spaceholder      3/7/2021   12:00      0         
Spaceholder      3/8/2021   12:00      0         
Spaceholder      3/9/2021   12:00      0         
Spaceholder      3/10/2021  12:00      0         
Spaceholder      3/11/2021  12:00      0         
Spaceholder      3/12/2021  12:00      0         
Spaceholder      3/13/2021  12:00      0         
Spaceholder      3/14/2021  12:00      0         
Spaceholder      3/15/2021  12:00      0         
Spaceholder      3/16/2021  12:00      0         
Spaceholder      3/17/2021  12:00      0         
Spaceholder      3/18/2021  12:00      0         
Spaceholder      3/19/2021  12:00      0         
Spaceholder      3/20/2021  12:00      0         
Spaceholder      3/21/2021  12:00      0         
Spaceholder      3/22/2021  12:00      0         
Spaceholder      3/23/2021  12:00      0         
Spaceholder      3/24/2021  12:00      0         
Spaceholder      3/25/2021  12:00      0         
Spaceholder      3/26/2021  12:00      0         
Spaceholder      3/27/2021  12:00      0         
Spaceholder      3/28/2021  12:00      0         
Spaceholder      3/29/2021  12:00      0         
Spaceholder      3/30/2021  12:00      0         
Spaceholder      3/31/2021  12:00      0         
Spaceholder      4/1/2021   12:00      0         
Spaceholder      4/2/2021   12:00      0         
Spaceholder      4/3/2021   12:00      0         
Spaceholder      4/4/2021   12:00      0         
Spaceholder      4/5/2021   12:00      0         
Spaceholder      4/6/2021   12:00      0         
Spaceholder      4/7/2021   12:00      0         
Spaceholder      4/8/2021   12:00      0         
Spaceholder      4/9/2021   12:00      0         
Spaceholder      4/10/2021  12:00      0         
Spaceholder      4/11/2021  12:00      0         
Spaceholder      4/12/2021  12:00      0         
Spaceholder      4/13/2021  12:00      0         
Spaceholder      4/14/2021  12:00      0         
Spaceholder      4/15/2021  12:00      0         
Spaceholder      4/16/2021  12:00      0         
Spaceholder      4/17/2021  12:00      0         
Spaceholder      4/18/2021  12:00      0         
Spaceholder      4/19/2021  12:00      0         
Spaceholder      4/20/2021  12:00      0         
Spaceholder      4/21/2021  12:00      0         
Spaceholder      4/22/2021  12:00      0         
Spaceholder      4/23/2021  12:00      0         
Spaceholder      4/24/2021  12:00      0         
Spaceholder      4/25/2021  12:00      0         
Spaceholder      4/26/2021  12:00      0         
Spaceholder      4/27/2021  12:00      0         
Spaceholder      4/28/2021  12:00      0         
Spaceholder      4/29/2021  12:00      0         
Spaceholder      4/30/2021  12:00      0         
Spaceholder      5/1/2021   12:00      0         
Spaceholder      5/2/2021   12:00      0         
Spaceholder      5/3/2021   12:00      0         
Spaceholder      5/4/2021   12:00      0         
Spaceholder      5/5/2021   12:00      0         
Spaceholder      5/6/2021   12:00      0         
Spaceholder      5/7/2021   12:00      0         
Spaceholder      5/8/2021   12:00      0         
Spaceholder      5/9/2021   12:00      0         
Spaceholder      5/10/2021  12:00      0         
Spaceholder      5/11/2021  12:00      0         
Spaceholder      5/12/2021  12:00      0         
Spaceholder      5/13/2021  12:00      0         
Spaceholder      5/14/2021  12:00      0         
Spaceholder      5/15/2021  12:00      0         
Spaceholder      5/16/2021  12:00      0         
Spaceholder      5/17/2021  12:00      0         
Spaceholder      5/18/2021  12:00      0         
Spaceholder      5/19/2021  12:00      0         
Spaceholder      5/20/2021  12:00      0         
;
;15 min precip data summarised from storrs ag farm 1 min data
11.19-5.21_15_min 11/1/2019  0:00       0         
11.19-5.21_15_min 11/1/2019  0:15       0         
11.19-5.21_15_min 11/1/2019  0:30       0         
11.19-5.21_15_min 11/1/2019  0:45       0         
11.19-5.21_15_min 11/1/2019  1:00       0         
11.19-5.21_15_min 11/1/2019  1:15       0         
11.19-5.21_15_min 11/1/2019  1:30       0         
11.19-5.21_15_min 11/1/2019  1:45       0         
11.19-5.21_15_min 11/1/2019  2:00       0         
11.19-5.21_15_min 11/1/2019  2:15       0         
11.19-5.21_15_min 11/1/2019  2:30       0.01      
11.19-5.21_15_min 11/1/2019  2:45       0.02      
11.19-5.21_15_min 11/1/2019  3:00       0.02      
11.19-5.21_15_min 11/1/2019  3:15       0.01      
11.19-5.21_15_min 11/1/2019  3:30       0.05      
11.19-5.21_15_min 11/1/2019  3:45       0         
11.19-5.21_15_min 11/1/2019  4:00       0         
11.19-5.21_15_min 11/1/2019  4:15       0         
11.19-5.21_15_min 11/1/2019  4:30       0         
11.19-5.21_15_min 11/1/2019  4:45       0.01      
11.19-5.21_15_min 11/1/2019  5:00       0         
11.19-5.21_15_min 11/1/2019  5:15       0         
11.19-5.21_15_min 11/1/2019  5:30       0         
11.19-5.21_15_min 11/1/2019  5:45       0         
11.19-5.21_15_min 11/1/2019  6:00       0.01      
11.19-5.21_15_min 11/1/2019  6:15       0         
11.19-5.21_15_min 11/1/2019  6:30       0         
11.19-5.21_15_min 11/1/2019  6:45       0         
11.19-5.21_15_min 11/1/2019  7:00       0         
11.19-5.21_15_min 11/1/2019  7:15       0         
11.19-5.21_15_min 11/1/2019  7:30       0         
11.19-5.21_15_min 11/1/2019  7:45       0         
11.19-5.21_15_min 11/1/2019  8:00       0         
11.19-5.21_15_min 11/1/2019  8:15       0         
11.19-5.21_15_min 11/1/2019  8:30       0         
11.19-5.21_15_min 11/1/2019  8:45       0         
11.19-5.21_15_min 11/1/2019  9:00       0         
11.19-5.21_15_min 11/1/2019  9:15       0         
11.19-5.21_15_min 11/1/2019  9:30       0         
11.19-5.21_15_min 11/1/2019  9:45       0         
11.19-5.21_15_min 11/1/2019  10:00      0         
11.19-5.21_15_min 11/1/2019  10:15      0         
11.19-5.21_15_min 11/1/2019  10:30      0         
11.19-5.21_15_min 11/1/2019  10:45      0         
11.19-5.21_15_min 11/1/2019  11:00      0         
11.19-5.21_15_min 11/1/2019  11:15      0         
11.19-5.21_15_min 11/1/2019  11:30      0         
11.19-5.21_15_min 11/1/2019  11:45      0         
11.19-5.21_15_min 11/1/2019  12:00      0         
11.19-5.21_15_min 11/1/2019  12:15      0         
11.19-5.21_15_min 11/1/2019  12:30      0         
11.19-5.21_15_min 11/1/2019  12:45      0         
11.19-5.21_15_min 11/1/2019  13:00      0         
11.19-5.21_15_min 11/1/2019  13:15      0         
11.19-5.21_15_min 11/1/2019  13:30      0         
11.19-5.21_15_min 11/1/2019  13:45      0         
11.19-5.21_15_min 11/1/2019  14:00      0         
11.19-5.21_15_min 11/1/2019  14:15      0         
11.19-5.21_15_min 11/1/2019  14:30      0         
11.19-5.21_15_min 11/1/2019  14:45      0         
11.19-5.21_15_min 11/1/2019  15:00      0         
11.19-5.21_15_min 11/1/2019  15:15      0         
11.19-5.21_15_min 11/1/2019  15:30      0         
11.19-5.21_15_min 11/1/2019  15:45      0         
11.19-5.21_15_min 11/1/2019  16:00      0         
11.19-5.21_15_min 11/1/2019  16:15      0         
11.19-5.21_15_min 11/1/2019  16:30      0         
11.19-5.21_15_min 11/1/2019  16:45      0         
11.19-5.21_15_min 11/1/2019  17:00      0         
11.19-5.21_15_min 11/1/2019  17:15      0         
11.19-5.21_15_min 11/1/2019  17:30      0         
11.19-5.21_15_min 11/1/2019  17:45      0         
11.19-5.21_15_min 11/1/2019  18:00      0         
11.19-5.21_15_min 11/1/2019  18:15      0         
11.19-5.21_15_min 11/1/2019  18:45      0         
11.19-5.21_15_min 11/1/2019  19:00      0         
11.19-5.21_15_min 11/1/2019  19:15      0         
11.19-5.21_15_min 11/1/2019  19:30      0         
11.19-5.21_15_min 11/1/2019  19:45      0         
11.19-5.21_15_min 11/1/2019  20:00      0         
11.19-5.21_15_min 11/1/2019  20:15      0         
11.19-5.21_15_min 11/1/2019  20:30      0         
11.19-5.21_15_min 11/1/2019  20:45      0         
11.19-5.21_15_min 11/1/2019  21:00      0         
11.19-5.21_15_min 11/1/2019  21:15      0         
11.19-5.21_15_min 11/1/2019  21:30      0         
11.19-5.21_15_min 11/1/2019  21:45      0         
11.19-5.21_15_min 11/1/2019  22:00      0         
11.19-5.21_15_min 11/1/2019  22:15      0         
11.19-5.21_15_min 11/1/2019  22:30      0         
11.19-5.21_15_min 11/1/2019  22:45      0         
11.19-5.21_15_min 11/1/2019  23:00      0         
11.19-5.21_15_min 11/1/2019  23:15      0         
11.19-5.21_15_min 11/1/2019  23:30      0         
11.19-5.21_15_min 11/1/2019  23:45      0         
11.19-5.21_15_min 11/2/2019  0:00       0         
11.19-5.21_15_min 11/2/2019  0:15       0         
11.19-5.21_15_min 11/2/2019  0:30       0         
11.19-5.21_15_min 11/2/2019  0:45       0         
11.19-5.21_15_min 11/2/2019  1:00       0         
11.19-5.21_15_min 11/2/2019  1:15       0         
11.19-5.21_15_min 11/2/2019  1:30       0         
11.19-5.21_15_min 11/2/2019  1:45       0         
11.19-5.21_15_min 11/2/2019  2:00       0         
11.19-5.21_15_min 11/2/2019  2:15       0         
11.19-5.21_15_min 11/2/2019  2:30       0         
11.19-5.21_15_min 11/2/2019  2:45       0         
11.19-5.21_15_min 11/2/2019  3:00       0         
11.19-5.21_15_min 11/2/2019  3:15       0         
11.19-5.21_15_min 11/2/2019  3:30       0         
11.19-5.21_15_min 11/2/2019  3:45       0         
11.19-5.21_15_min 11/2/2019  4:00       0         
11.19-5.21_15_min 11/2/2019  4:15       0         
11.19-5.21_15_min 11/2/2019  4:30       0         
11.19-5.21_15_min 11/2/2019  4:45       0         
11.19-5.21_15_min 11/2/2019  5:00       0         
11.19-5.21_15_min 11/2/2019  5:15       0         
11.19-5.21_15_min 11/2/2019  5:30       0         
11.19-5.21_15_min 11/2/2019  5:45       0         
11.19-5.21_15_min 11/2/2019  6:00       0         
11.19-5.21_15_min 11/2/2019  6:15       0         
11.19-5.21_15_min 11/2/2019  6:30       0         
11.19-5.21_15_min 11/2/2019  6:45       0         
11.19-5.21_15_min 11/2/2019  7:00       0         
11.19-5.21_15_min 11/2/2019  7:15       0         
11.19-5.21_15_min 11/2/2019  7:30       0         
11.19-5.21_15_min 11/2/2019  7:45       0         
11.19-5.21_15_min 11/2/2019  8:00       0         
11.19-5.21_15_min 11/2/2019  8:15       0         
11.19-5.21_15_min 11/2/2019  8:30       0         
11.19-5.21_15_min 11/2/2019  8:45       0         
11.19-5.21_15_min 11/2/2019  9:00       0         
11.19-5.21_15_min 11/2/2019  9:15       0         
11.19-5.21_15_min 11/2/2019  9:30       0         
11.19-5.21_15_min 11/2/2019  9:45       0         
11.19-5.21_15_min 11/2/2019  10:00      0         
11.19-5.21_15_min 11/2/2019  10:15      0         
11.19-5.21_15_min 11/2/2019  10:30      0         
11.19-5.21_15_min 11/2/2019  10:45      0         
11.19-5.21_15_min 11/2/2019  11:00      0         
11.19-5.21_15_min 11/2/2019  11:15      0         
11.19-5.21_15_min 11/2/2019  11:30      0         
11.19-5.21_15_min 11/2/2019  11:45      0         
11.19-5.21_15_min 11/2/2019  12:00      0         
11.19-5.21_15_min 11/2/2019  12:15      0         
11.19-5.21_15_min 11/2/2019  12:30      0         
11.19-5.21_15_min 11/2/2019  12:45      0         
11.19-5.21_15_min 11/2/2019  13:00      0         
11.19-5.21_15_min 11/2/2019  13:15      0         
11.19-5.21_15_min 11/2/2019  13:30      0         
11.19-5.21_15_min 11/2/2019  13:45      0         
11.19-5.21_15_min 11/2/2019  14:00      0         
11.19-5.21_15_min 11/2/2019  14:15      0         
11.19-5.21_15_min 11/2/2019  14:30      0         
11.19-5.21_15_min 11/2/2019  14:45      0         
11.19-5.21_15_min 11/2/2019  15:00      0         
11.19-5.21_15_min 11/2/2019  15:15      0         
11.19-5.21_15_min 11/2/2019  15:30      0         
11.19-5.21_15_min 11/2/2019  15:45      0         
11.19-5.21_15_min 11/2/2019  16:00      0         
11.19-5.21_15_min 11/2/2019  16:15      0         
11.19-5.21_15_min 11/2/2019  16:30      0         
11.19-5.21_15_min 11/2/2019  16:45      0         
11.19-5.21_15_min 11/2/2019  17:00      0         
11.19-5.21_15_min 11/2/2019  17:15      0         
11.19-5.21_15_min 11/2/2019  17:30      0         
11.19-5.21_15_min 11/2/2019  17:45      0         
11.19-5.21_15_min 11/2/2019  18:30      0         
11.19-5.21_15_min 11/2/2019  18:45      0         
11.19-5.21_15_min 11/2/2019  19:00      0         
11.19-5.21_15_min 11/2/2019  19:15      0         
11.19-5.21_15_min 11/2/2019  19:30      0         
11.19-5.21_15_min 11/2/2019  19:45      0         
11.19-5.21_15_min 11/2/2019  20:00      0         
11.19-5.21_15_min 11/2/2019  20:15      0         
11.19-5.21_15_min 11/2/2019  20:30      0         
11.19-5.21_15_min 11/2/2019  20:45      0         
11.19-5.21_15_min 11/2/2019  21:00      0         
11.19-5.21_15_min 11/2/2019  21:15      0         
11.19-5.21_15_min 11/2/2019  21:30      0         
11.19-5.21_15_min 11/2/2019  21:45      0         
11.19-5.21_15_min 11/2/2019  22:00      0         
11.19-5.21_15_min 11/2/2019  22:15      0         
11.19-5.21_15_min 11/2/2019  22:30      0         
11.19-5.21_15_min 11/2/2019  22:45      0         
11.19-5.21_15_min 11/2/2019  23:00      0         
11.19-5.21_15_min 11/2/2019  23:15      0         
11.19-5.21_15_min 11/2/2019  23:30      0         
11.19-5.21_15_min 11/2/2019  23:45      0         
11.19-5.21_15_min 11/3/2019  0:00       0         
11.19-5.21_15_min 11/3/2019  0:15       0         
11.19-5.21_15_min 11/3/2019  0:30       0         
11.19-5.21_15_min 11/3/2019  0:45       0         
11.19-5.21_15_min 11/3/2019  1:00       0         
11.19-5.21_15_min 11/3/2019  1:15       0         
11.19-5.21_15_min 11/3/2019  1:30       0         
11.19-5.21_15_min 11/3/2019  1:45       0         
11.19-5.21_15_min 11/3/2019  2:00       0         
11.19-5.21_15_min 11/3/2019  2:15       0         
11.19-5.21_15_min 11/3/2019  2:30       0         
11.19-5.21_15_min 11/3/2019  2:45       0         
11.19-5.21_15_min 11/3/2019  3:00       0         
11.19-5.21_15_min 11/3/2019  3:15       0         
11.19-5.21_15_min 11/3/2019  3:30       0         
11.19-5.21_15_min 11/3/2019  3:45       0         
11.19-5.21_15_min 11/3/2019  4:00       0         
11.19-5.21_15_min 11/3/2019  4:15       0         
11.19-5.21_15_min 11/3/2019  4:30       0         
11.19-5.21_15_min 11/3/2019  4:45       0         
11.19-5.21_15_min 11/3/2019  5:00       0         
11.19-5.21_15_min 11/3/2019  5:15       0         
11.19-5.21_15_min 11/3/2019  5:30       0         
11.19-5.21_15_min 11/3/2019  5:45       0         
11.19-5.21_15_min 11/3/2019  6:00       0         
11.19-5.21_15_min 11/3/2019  6:15       0         
11.19-5.21_15_min 11/3/2019  6:30       0         
11.19-5.21_15_min 11/3/2019  6:45       0         
11.19-5.21_15_min 11/3/2019  7:00       0         
11.19-5.21_15_min 11/3/2019  7:15       0         
11.19-5.21_15_min 11/3/2019  7:30       0         
11.19-5.21_15_min 11/3/2019  7:45       0         
11.19-5.21_15_min 11/3/2019  8:00       0         
11.19-5.21_15_min 11/3/2019  8:15       0         
11.19-5.21_15_min 11/3/2019  8:30       0         
11.19-5.21_15_min 11/3/2019  8:45       0         
11.19-5.21_15_min 11/3/2019  9:00       0         
11.19-5.21_15_min 11/3/2019  9:15       0         
11.19-5.21_15_min 11/3/2019  9:30       0         
11.19-5.21_15_min 11/3/2019  9:45       0         
11.19-5.21_15_min 11/3/2019  10:00      0         
11.19-5.21_15_min 11/3/2019  10:15      0         
11.19-5.21_15_min 11/3/2019  10:30      0         
11.19-5.21_15_min 11/3/2019  10:45      0         
11.19-5.21_15_min 11/3/2019  11:00      0         
11.19-5.21_15_min 11/3/2019  11:15      0         
11.19-5.21_15_min 11/3/2019  11:30      0         
11.19-5.21_15_min 11/3/2019  11:45      0         
11.19-5.21_15_min 11/3/2019  12:00      0         
11.19-5.21_15_min 11/3/2019  12:15      0         
11.19-5.21_15_min 11/3/2019  12:30      0         
11.19-5.21_15_min 11/3/2019  12:45      0         
11.19-5.21_15_min 11/3/2019  13:00      0         
11.19-5.21_15_min 11/3/2019  13:15      0         
11.19-5.21_15_min 11/3/2019  13:30      0         
11.19-5.21_15_min 11/3/2019  13:45      0         
11.19-5.21_15_min 11/3/2019  14:00      0         
11.19-5.21_15_min 11/3/2019  14:15      0         
11.19-5.21_15_min 11/3/2019  14:30      0         
11.19-5.21_15_min 11/3/2019  14:45      0         
11.19-5.21_15_min 11/3/2019  15:00      0         
11.19-5.21_15_min 11/3/2019  15:15      0         
11.19-5.21_15_min 11/3/2019  15:30      0         
11.19-5.21_15_min 11/3/2019  15:45      0         
11.19-5.21_15_min 11/3/2019  16:00      0         
11.19-5.21_15_min 11/3/2019  16:15      0         
11.19-5.21_15_min 11/3/2019  16:30      0         
11.19-5.21_15_min 11/3/2019  16:45      0         
11.19-5.21_15_min 11/3/2019  17:00      0         
11.19-5.21_15_min 11/3/2019  17:15      0         
11.19-5.21_15_min 11/3/2019  17:30      0         
11.19-5.21_15_min 11/3/2019  17:45      0         
11.19-5.21_15_min 11/3/2019  18:00      0         
11.19-5.21_15_min 11/3/2019  18:15      0         
11.19-5.21_15_min 11/3/2019  18:30      0         
11.19-5.21_15_min 11/3/2019  18:45      0         
11.19-5.21_15_min 11/3/2019  19:00      0         
11.19-5.21_15_min 11/3/2019  19:15      0         
11.19-5.21_15_min 11/3/2019  19:30      0         
11.19-5.21_15_min 11/3/2019  19:45      0         
11.19-5.21_15_min 11/3/2019  20:00      0         
11.19-5.21_15_min 11/3/2019  20:15      0         
11.19-5.21_15_min 11/3/2019  20:30      0         
11.19-5.21_15_min 11/3/2019  20:45      0         
11.19-5.21_15_min 11/3/2019  21:00      0         
11.19-5.21_15_min 11/3/2019  21:15      0         
11.19-5.21_15_min 11/3/2019  21:30      0         
11.19-5.21_15_min 11/3/2019  21:45      0         
11.19-5.21_15_min 11/3/2019  22:00      0         
11.19-5.21_15_min 11/3/2019  22:15      0         
11.19-5.21_15_min 11/3/2019  22:30      0         
11.19-5.21_15_min 11/3/2019  22:45      0         
11.19-5.21_15_min 11/3/2019  23:00      0         
11.19-5.21_15_min 11/3/2019  23:15      0         
11.19-5.21_15_min 11/3/2019  23:30      0         
11.19-5.21_15_min 11/3/2019  23:45      0         
11.19-5.21_15_min 11/4/2019  0:00       0         
11.19-5.21_15_min 11/4/2019  0:15       0         
11.19-5.21_15_min 11/4/2019  0:30       0         
11.19-5.21_15_min 11/4/2019  0:45       0         
11.19-5.21_15_min 11/4/2019  1:00       0         
11.19-5.21_15_min 11/4/2019  1:15       0         
11.19-5.21_15_min 11/4/2019  1:30       0         
11.19-5.21_15_min 11/4/2019  1:45       0         
11.19-5.21_15_min 11/4/2019  2:00       0         
11.19-5.21_15_min 11/4/2019  2:15       0         
11.19-5.21_15_min 11/4/2019  2:30       0         
11.19-5.21_15_min 11/4/2019  2:45       0         
11.19-5.21_15_min 11/4/2019  3:00       0         
11.19-5.21_15_min 11/4/2019  3:15       0         
11.19-5.21_15_min 11/4/2019  3:30       0         
11.19-5.21_15_min 11/4/2019  3:45       0         
11.19-5.21_15_min 11/4/2019  4:00       0         
11.19-5.21_15_min 11/4/2019  4:15       0         
11.19-5.21_15_min 11/4/2019  4:30       0         
11.19-5.21_15_min 11/4/2019  4:45       0         
11.19-5.21_15_min 11/4/2019  5:00       0         
11.19-5.21_15_min 11/4/2019  5:15       0         
11.19-5.21_15_min 11/4/2019  5:30       0         
11.19-5.21_15_min 11/4/2019  5:45       0         
11.19-5.21_15_min 11/4/2019  6:00       0         
11.19-5.21_15_min 11/4/2019  6:15       0         
11.19-5.21_15_min 11/4/2019  6:30       0         
11.19-5.21_15_min 11/4/2019  6:45       0         
11.19-5.21_15_min 11/4/2019  7:00       0         
11.19-5.21_15_min 11/4/2019  7:15       0         
11.19-5.21_15_min 11/4/2019  7:30       0         
11.19-5.21_15_min 11/4/2019  7:45       0         
11.19-5.21_15_min 11/4/2019  8:00       0         
11.19-5.21_15_min 11/4/2019  8:15       0         
11.19-5.21_15_min 11/4/2019  8:30       0         
11.19-5.21_15_min 11/4/2019  8:45       0         
11.19-5.21_15_min 11/4/2019  9:00       0         
11.19-5.21_15_min 11/4/2019  9:15       0         
11.19-5.21_15_min 11/4/2019  9:30       0         
11.19-5.21_15_min 11/4/2019  9:45       0         
11.19-5.21_15_min 11/4/2019  10:00      0         
11.19-5.21_15_min 11/4/2019  10:15      0         
11.19-5.21_15_min 11/4/2019  10:30      0         
11.19-5.21_15_min 11/4/2019  10:45      0         
11.19-5.21_15_min 11/4/2019  11:00      0         
11.19-5.21_15_min 11/4/2019  11:15      0         
11.19-5.21_15_min 11/4/2019  11:30      0         
11.19-5.21_15_min 11/4/2019  11:45      0         
11.19-5.21_15_min 11/4/2019  12:00      0         
11.19-5.21_15_min 11/4/2019  12:15      0         
11.19-5.21_15_min 11/4/2019  12:30      0         
11.19-5.21_15_min 11/4/2019  12:45      0         
11.19-5.21_15_min 11/4/2019  13:00      0         
11.19-5.21_15_min 11/4/2019  13:15      0         
11.19-5.21_15_min 11/4/2019  13:30      0         
11.19-5.21_15_min 11/4/2019  13:45      0         
11.19-5.21_15_min 11/4/2019  14:00      0         
11.19-5.21_15_min 11/4/2019  14:15      0         
11.19-5.21_15_min 11/4/2019  14:30      0         
11.19-5.21_15_min 11/4/2019  14:45      0         
11.19-5.21_15_min 11/4/2019  15:00      0         
11.19-5.21_15_min 11/4/2019  15:15      0         
11.19-5.21_15_min 11/4/2019  15:30      0         
11.19-5.21_15_min 11/4/2019  15:45      0         
11.19-5.21_15_min 11/4/2019  16:00      0         
11.19-5.21_15_min 11/4/2019  16:15      0         
11.19-5.21_15_min 11/4/2019  16:30      0         
11.19-5.21_15_min 11/4/2019  16:45      0         
11.19-5.21_15_min 11/4/2019  17:00      0         
11.19-5.21_15_min 11/4/2019  17:15      0         
11.19-5.21_15_min 11/4/2019  17:30      0         
11.19-5.21_15_min 11/4/2019  17:45      0         
11.19-5.21_15_min 11/4/2019  18:00      0         
11.19-5.21_15_min 11/4/2019  18:15      0         
11.19-5.21_15_min 11/4/2019  18:30      0         
11.19-5.21_15_min 11/4/2019  18:45      0         
11.19-5.21_15_min 11/4/2019  19:00      0         
11.19-5.21_15_min 11/4/2019  19:15      0         
11.19-5.21_15_min 11/4/2019  19:30      0         
11.19-5.21_15_min 11/4/2019  19:45      0         
11.19-5.21_15_min 11/4/2019  20:00      0         
11.19-5.21_15_min 11/4/2019  20:15      0         
11.19-5.21_15_min 11/4/2019  20:30      0         
11.19-5.21_15_min 11/4/2019  20:45      0         
11.19-5.21_15_min 11/4/2019  21:00      0         
11.19-5.21_15_min 11/4/2019  21:15      0         
11.19-5.21_15_min 11/4/2019  21:30      0         
11.19-5.21_15_min 11/4/2019  21:45      0         
11.19-5.21_15_min 11/4/2019  22:00      0         
11.19-5.21_15_min 11/4/2019  22:15      0         
11.19-5.21_15_min 11/4/2019  22:30      0         
11.19-5.21_15_min 11/4/2019  22:45      0         
11.19-5.21_15_min 11/4/2019  23:00      0         
11.19-5.21_15_min 11/4/2019  23:15      0         
11.19-5.21_15_min 11/4/2019  23:30      0         
11.19-5.21_15_min 11/4/2019  23:45      0         
11.19-5.21_15_min 11/5/2019  0:00       0         
11.19-5.21_15_min 11/5/2019  0:15       0         
11.19-5.21_15_min 11/5/2019  0:30       0         
11.19-5.21_15_min 11/5/2019  0:45       0         
11.19-5.21_15_min 11/5/2019  1:00       0         
11.19-5.21_15_min 11/5/2019  1:15       0         
11.19-5.21_15_min 11/5/2019  1:30       0         
11.19-5.21_15_min 11/5/2019  1:45       0         
11.19-5.21_15_min 11/5/2019  2:00       0         
11.19-5.21_15_min 11/5/2019  2:15       0         
11.19-5.21_15_min 11/5/2019  2:30       0         
11.19-5.21_15_min 11/5/2019  2:45       0         
11.19-5.21_15_min 11/5/2019  3:00       0         
11.19-5.21_15_min 11/5/2019  3:15       0         
11.19-5.21_15_min 11/5/2019  3:30       0         
11.19-5.21_15_min 11/5/2019  3:45       0         
11.19-5.21_15_min 11/5/2019  4:00       0         
11.19-5.21_15_min 11/5/2019  4:15       0         
11.19-5.21_15_min 11/5/2019  4:30       0         
11.19-5.21_15_min 11/5/2019  4:45       0         
11.19-5.21_15_min 11/5/2019  5:00       0         
11.19-5.21_15_min 11/5/2019  5:15       0         
11.19-5.21_15_min 11/5/2019  5:30       0         
11.19-5.21_15_min 11/5/2019  5:45       0         
11.19-5.21_15_min 11/5/2019  6:00       0         
11.19-5.21_15_min 11/5/2019  6:15       0         
11.19-5.21_15_min 11/5/2019  6:30       0         
11.19-5.21_15_min 11/5/2019  6:45       0         
11.19-5.21_15_min 11/5/2019  7:00       0         
11.19-5.21_15_min 11/5/2019  7:15       0         
11.19-5.21_15_min 11/5/2019  7:30       0         
11.19-5.21_15_min 11/5/2019  7:45       0         
11.19-5.21_15_min 11/5/2019  8:00       0         
11.19-5.21_15_min 11/5/2019  8:15       0         
11.19-5.21_15_min 11/5/2019  8:30       0         
11.19-5.21_15_min 11/5/2019  8:45       0         
11.19-5.21_15_min 11/5/2019  9:00       0         
11.19-5.21_15_min 11/5/2019  9:15       0         
11.19-5.21_15_min 11/5/2019  9:30       0         
11.19-5.21_15_min 11/5/2019  9:45       0         
11.19-5.21_15_min 11/5/2019  10:00      0         
11.19-5.21_15_min 11/5/2019  10:15      0         
11.19-5.21_15_min 11/5/2019  10:30      0         
11.19-5.21_15_min 11/5/2019  10:45      0         
11.19-5.21_15_min 11/5/2019  11:00      0         
11.19-5.21_15_min 11/5/2019  11:15      0         
11.19-5.21_15_min 11/5/2019  11:30      0         
11.19-5.21_15_min 11/5/2019  11:45      0         
11.19-5.21_15_min 11/5/2019  12:00      0         
11.19-5.21_15_min 11/5/2019  12:15      0         
11.19-5.21_15_min 11/5/2019  12:30      0         
11.19-5.21_15_min 11/5/2019  12:45      0         
11.19-5.21_15_min 11/5/2019  13:00      0         
11.19-5.21_15_min 11/5/2019  13:15      0         
11.19-5.21_15_min 11/5/2019  13:30      0.01      
11.19-5.21_15_min 11/5/2019  13:45      0         
11.19-5.21_15_min 11/5/2019  14:00      0.01      
11.19-5.21_15_min 11/5/2019  14:15      0         
11.19-5.21_15_min 11/5/2019  14:30      0         
11.19-5.21_15_min 11/5/2019  14:45      0         
11.19-5.21_15_min 11/5/2019  15:00      0         
11.19-5.21_15_min 11/5/2019  15:15      0         
11.19-5.21_15_min 11/5/2019  15:30      0         
11.19-5.21_15_min 11/5/2019  15:45      0         
11.19-5.21_15_min 11/5/2019  16:00      0         
11.19-5.21_15_min 11/5/2019  16:15      0         
11.19-5.21_15_min 11/5/2019  16:30      0         
11.19-5.21_15_min 11/5/2019  16:45      0         
11.19-5.21_15_min 11/5/2019  17:00      0         
11.19-5.21_15_min 11/5/2019  17:15      0         
11.19-5.21_15_min 11/5/2019  17:30      0         
11.19-5.21_15_min 11/5/2019  17:45      0         
11.19-5.21_15_min 11/5/2019  18:00      0         
11.19-5.21_15_min 11/5/2019  18:15      0         
11.19-5.21_15_min 11/5/2019  18:30      0         
11.19-5.21_15_min 11/5/2019  18:45      0         
11.19-5.21_15_min 11/5/2019  19:00      0         
11.19-5.21_15_min 11/5/2019  19:15      0         
11.19-5.21_15_min 11/5/2019  19:30      0         
11.19-5.21_15_min 11/5/2019  19:45      0         
11.19-5.21_15_min 11/5/2019  20:00      0         
11.19-5.21_15_min 11/5/2019  20:15      0         
11.19-5.21_15_min 11/5/2019  20:30      0         
11.19-5.21_15_min 11/5/2019  20:45      0         
11.19-5.21_15_min 11/5/2019  21:00      0         
11.19-5.21_15_min 11/5/2019  21:15      0         
11.19-5.21_15_min 11/5/2019  21:30      0         
11.19-5.21_15_min 11/5/2019  21:45      0         
11.19-5.21_15_min 11/5/2019  22:00      0         
11.19-5.21_15_min 11/5/2019  22:15      0         
11.19-5.21_15_min 11/5/2019  22:30      0         
11.19-5.21_15_min 11/5/2019  22:45      0         
11.19-5.21_15_min 11/5/2019  23:00      0         
11.19-5.21_15_min 11/5/2019  23:15      0         
11.19-5.21_15_min 11/5/2019  23:30      0         
11.19-5.21_15_min 11/5/2019  23:45      0         
11.19-5.21_15_min 11/6/2019  0:00       0         
11.19-5.21_15_min 11/6/2019  0:15       0         
11.19-5.21_15_min 11/6/2019  0:30       0         
11.19-5.21_15_min 11/6/2019  0:45       0         
11.19-5.21_15_min 11/6/2019  1:00       0         
11.19-5.21_15_min 11/6/2019  1:15       0         
11.19-5.21_15_min 11/6/2019  1:30       0         
11.19-5.21_15_min 11/6/2019  1:45       0         
11.19-5.21_15_min 11/6/2019  2:00       0         
11.19-5.21_15_min 11/6/2019  2:15       0         
11.19-5.21_15_min 11/6/2019  2:30       0         
11.19-5.21_15_min 11/6/2019  2:45       0         
11.19-5.21_15_min 11/6/2019  3:00       0         
11.19-5.21_15_min 11/6/2019  3:15       0         
11.19-5.21_15_min 11/6/2019  3:30       0         
11.19-5.21_15_min 11/6/2019  3:45       0         
11.19-5.21_15_min 11/6/2019  4:00       0         
11.19-5.21_15_min 11/6/2019  4:15       0         
11.19-5.21_15_min 11/6/2019  4:30       0         
11.19-5.21_15_min 11/6/2019  4:45       0         
11.19-5.21_15_min 11/6/2019  5:00       0         
11.19-5.21_15_min 11/6/2019  5:15       0         
11.19-5.21_15_min 11/6/2019  5:30       0         
11.19-5.21_15_min 11/6/2019  5:45       0         
11.19-5.21_15_min 11/6/2019  6:00       0         
11.19-5.21_15_min 11/6/2019  6:15       0         
11.19-5.21_15_min 11/6/2019  6:30       0         
11.19-5.21_15_min 11/6/2019  6:45       0         
11.19-5.21_15_min 11/6/2019  7:00       0         
11.19-5.21_15_min 11/6/2019  7:15       0         
11.19-5.21_15_min 11/6/2019  7:30       0         
11.19-5.21_15_min 11/6/2019  7:45       0         
11.19-5.21_15_min 11/6/2019  8:00       0         
11.19-5.21_15_min 11/6/2019  8:15       0         
11.19-5.21_15_min 11/6/2019  8:30       0         
11.19-5.21_15_min 11/6/2019  8:45       0         
11.19-5.21_15_min 11/6/2019  9:00       0         
11.19-5.21_15_min 11/6/2019  9:15       0         
11.19-5.21_15_min 11/6/2019  9:30       0         
11.19-5.21_15_min 11/6/2019  9:45       0         
11.19-5.21_15_min 11/6/2019  10:00      0         
11.19-5.21_15_min 11/6/2019  10:15      0         
11.19-5.21_15_min 11/6/2019  10:30      0         
11.19-5.21_15_min 11/6/2019  10:45      0         
11.19-5.21_15_min 11/6/2019  11:00      0         
11.19-5.21_15_min 11/6/2019  11:15      0         
11.19-5.21_15_min 11/6/2019  11:30      0         
11.19-5.21_15_min 11/6/2019  11:45      0         
11.19-5.21_15_min 11/6/2019  12:00      0         
11.19-5.21_15_min 11/6/2019  12:15      0         
11.19-5.21_15_min 11/6/2019  12:30      0         
11.19-5.21_15_min 11/6/2019  12:45      0         
11.19-5.21_15_min 11/6/2019  13:00      0         
11.19-5.21_15_min 11/6/2019  13:15      0         
11.19-5.21_15_min 11/6/2019  13:30      0         
11.19-5.21_15_min 11/6/2019  13:45      0         
11.19-5.21_15_min 11/6/2019  14:00      0         
11.19-5.21_15_min 11/6/2019  14:15      0         
11.19-5.21_15_min 11/6/2019  14:30      0         
11.19-5.21_15_min 11/6/2019  14:45      0         
11.19-5.21_15_min 11/6/2019  15:00      0         
11.19-5.21_15_min 11/6/2019  15:15      0         
11.19-5.21_15_min 11/6/2019  15:30      0         
11.19-5.21_15_min 11/6/2019  15:45      0         
11.19-5.21_15_min 11/6/2019  16:00      0         
11.19-5.21_15_min 11/6/2019  16:15      0         
11.19-5.21_15_min 11/6/2019  16:30      0         
11.19-5.21_15_min 11/6/2019  16:45      0         
11.19-5.21_15_min 11/6/2019  17:00      0         
11.19-5.21_15_min 11/6/2019  17:15      0         
11.19-5.21_15_min 11/6/2019  17:30      0         
11.19-5.21_15_min 11/6/2019  17:45      0         
11.19-5.21_15_min 11/6/2019  18:00      0         
11.19-5.21_15_min 11/6/2019  18:15      0         
11.19-5.21_15_min 11/6/2019  18:30      0         
11.19-5.21_15_min 11/6/2019  18:45      0         
11.19-5.21_15_min 11/6/2019  19:00      0         
11.19-5.21_15_min 11/6/2019  19:15      0         
11.19-5.21_15_min 11/6/2019  19:30      0         
11.19-5.21_15_min 11/6/2019  19:45      0         
11.19-5.21_15_min 11/6/2019  20:00      0         
11.19-5.21_15_min 11/6/2019  20:15      0         
11.19-5.21_15_min 11/6/2019  20:30      0         
11.19-5.21_15_min 11/6/2019  20:45      0         
11.19-5.21_15_min 11/6/2019  21:00      0         
11.19-5.21_15_min 11/6/2019  21:15      0         
11.19-5.21_15_min 11/6/2019  21:30      0         
11.19-5.21_15_min 11/6/2019  21:45      0         
11.19-5.21_15_min 11/6/2019  22:00      0         
11.19-5.21_15_min 11/6/2019  22:15      0         
11.19-5.21_15_min 11/6/2019  22:30      0         
11.19-5.21_15_min 11/6/2019  22:45      0         
11.19-5.21_15_min 11/6/2019  23:00      0         
11.19-5.21_15_min 11/6/2019  23:15      0         
11.19-5.21_15_min 11/6/2019  23:30      0         
11.19-5.21_15_min 11/6/2019  23:45      0         
11.19-5.21_15_min 11/7/2019  0:00       0         
11.19-5.21_15_min 11/7/2019  0:15       0         
11.19-5.21_15_min 11/7/2019  0:30       0         
11.19-5.21_15_min 11/7/2019  0:45       0         
11.19-5.21_15_min 11/7/2019  1:00       0         
11.19-5.21_15_min 11/7/2019  1:15       0         
11.19-5.21_15_min 11/7/2019  1:30       0         
11.19-5.21_15_min 11/7/2019  1:45       0         
11.19-5.21_15_min 11/7/2019  2:00       0         
11.19-5.21_15_min 11/7/2019  2:15       0         
11.19-5.21_15_min 11/7/2019  2:30       0         
11.19-5.21_15_min 11/7/2019  2:45       0         
11.19-5.21_15_min 11/7/2019  3:00       0         
11.19-5.21_15_min 11/7/2019  3:15       0         
11.19-5.21_15_min 11/7/2019  3:30       0         
11.19-5.21_15_min 11/7/2019  3:45       0         
11.19-5.21_15_min 11/7/2019  4:00       0         
11.19-5.21_15_min 11/7/2019  4:15       0         
11.19-5.21_15_min 11/7/2019  4:30       0         
11.19-5.21_15_min 11/7/2019  4:45       0         
11.19-5.21_15_min 11/7/2019  5:00       0         
11.19-5.21_15_min 11/7/2019  5:30       0         
11.19-5.21_15_min 11/7/2019  5:45       0         
11.19-5.21_15_min 11/7/2019  6:00       0         
11.19-5.21_15_min 11/7/2019  6:15       0         
11.19-5.21_15_min 11/7/2019  6:30       0         
11.19-5.21_15_min 11/7/2019  6:45       0         
11.19-5.21_15_min 11/7/2019  7:00       0         
11.19-5.21_15_min 11/7/2019  7:15       0         
11.19-5.21_15_min 11/7/2019  7:30       0         
11.19-5.21_15_min 11/7/2019  7:45       0         
11.19-5.21_15_min 11/7/2019  8:00       0         
11.19-5.21_15_min 11/7/2019  8:15       0         
11.19-5.21_15_min 11/7/2019  8:30       0         
11.19-5.21_15_min 11/7/2019  8:45       0         
11.19-5.21_15_min 11/7/2019  9:00       0         
11.19-5.21_15_min 11/7/2019  9:15       0         
11.19-5.21_15_min 11/7/2019  9:30       0         
11.19-5.21_15_min 11/7/2019  9:45       0         
11.19-5.21_15_min 11/7/2019  10:00      0         
11.19-5.21_15_min 11/7/2019  10:15      0         
11.19-5.21_15_min 11/7/2019  10:30      0         
11.19-5.21_15_min 11/7/2019  10:45      0         
11.19-5.21_15_min 11/7/2019  11:00      0         
11.19-5.21_15_min 11/7/2019  11:15      0         
11.19-5.21_15_min 11/7/2019  11:30      0         
11.19-5.21_15_min 11/7/2019  11:45      0         
11.19-5.21_15_min 11/7/2019  12:00      0         
11.19-5.21_15_min 11/7/2019  12:15      0         
11.19-5.21_15_min 11/7/2019  12:30      0         
11.19-5.21_15_min 11/7/2019  12:45      0         
11.19-5.21_15_min 11/7/2019  13:00      0         
11.19-5.21_15_min 11/7/2019  13:15      0         
11.19-5.21_15_min 11/7/2019  13:30      0         
11.19-5.21_15_min 11/7/2019  13:45      0         
11.19-5.21_15_min 11/7/2019  14:00      0         
11.19-5.21_15_min 11/7/2019  14:15      0         
11.19-5.21_15_min 11/7/2019  14:30      0         
11.19-5.21_15_min 11/7/2019  14:45      0         
11.19-5.21_15_min 11/7/2019  15:00      0         
11.19-5.21_15_min 11/7/2019  15:15      0         
11.19-5.21_15_min 11/7/2019  15:30      0.01      
11.19-5.21_15_min 11/7/2019  15:45      0.01      
11.19-5.21_15_min 11/7/2019  16:00      0.02      
11.19-5.21_15_min 11/7/2019  16:15      0         
11.19-5.21_15_min 11/7/2019  16:30      0.02      
11.19-5.21_15_min 11/7/2019  16:45      0.01      
11.19-5.21_15_min 11/7/2019  17:00      0         
11.19-5.21_15_min 11/7/2019  17:15      0.02      
11.19-5.21_15_min 11/7/2019  17:30      0.01      
11.19-5.21_15_min 11/7/2019  17:45      0.01      
11.19-5.21_15_min 11/7/2019  18:00      0.01      
11.19-5.21_15_min 11/7/2019  18:15      0.02      
11.19-5.21_15_min 11/7/2019  18:30      0.01      
11.19-5.21_15_min 11/7/2019  18:45      0.02      
11.19-5.21_15_min 11/7/2019  19:00      0.02      
11.19-5.21_15_min 11/7/2019  19:15      0.01      
11.19-5.21_15_min 11/7/2019  19:30      0.01      
11.19-5.21_15_min 11/7/2019  19:45      0.01      
11.19-5.21_15_min 11/7/2019  20:00      0.01      
11.19-5.21_15_min 11/7/2019  21:30      0         
11.19-5.21_15_min 11/7/2019  21:45      0         
11.19-5.21_15_min 11/7/2019  22:00      0         
11.19-5.21_15_min 11/7/2019  22:15      0         
11.19-5.21_15_min 11/7/2019  22:30      0         
11.19-5.21_15_min 11/7/2019  22:45      0         
11.19-5.21_15_min 11/7/2019  23:00      0         
11.19-5.21_15_min 11/7/2019  23:45      0         
11.19-5.21_15_min 11/8/2019  0:00       0         
11.19-5.21_15_min 11/8/2019  0:15       0         
11.19-5.21_15_min 11/8/2019  0:30       0         
11.19-5.21_15_min 11/8/2019  0:45       0         
11.19-5.21_15_min 11/8/2019  1:00       0         
11.19-5.21_15_min 11/8/2019  1:15       0         
11.19-5.21_15_min 11/8/2019  1:30       0         
11.19-5.21_15_min 11/8/2019  1:45       0         
11.19-5.21_15_min 11/8/2019  2:00       0         
11.19-5.21_15_min 11/8/2019  2:15       0         
11.19-5.21_15_min 11/8/2019  2:30       0         
11.19-5.21_15_min 11/8/2019  2:45       0         
11.19-5.21_15_min 11/8/2019  3:00       0         
11.19-5.21_15_min 11/8/2019  3:15       0         
11.19-5.21_15_min 11/8/2019  3:30       0         
11.19-5.21_15_min 11/8/2019  3:45       0         
11.19-5.21_15_min 11/8/2019  4:00       0         
11.19-5.21_15_min 11/8/2019  4:15       0         
11.19-5.21_15_min 11/8/2019  4:30       0         
11.19-5.21_15_min 11/8/2019  4:45       0         
11.19-5.21_15_min 11/8/2019  5:00       0         
11.19-5.21_15_min 11/8/2019  5:15       0         
11.19-5.21_15_min 11/8/2019  5:30       0         
11.19-5.21_15_min 11/8/2019  5:45       0         
11.19-5.21_15_min 11/8/2019  6:00       0         
11.19-5.21_15_min 11/8/2019  6:15       0         
11.19-5.21_15_min 11/8/2019  6:30       0         
11.19-5.21_15_min 11/8/2019  6:45       0         
11.19-5.21_15_min 11/8/2019  7:00       0         
11.19-5.21_15_min 11/8/2019  7:15       0         
11.19-5.21_15_min 11/8/2019  7:30       0         
11.19-5.21_15_min 11/8/2019  7:45       0         
11.19-5.21_15_min 11/8/2019  8:00       0         
11.19-5.21_15_min 11/8/2019  8:15       0         
11.19-5.21_15_min 11/8/2019  8:30       0         
11.19-5.21_15_min 11/8/2019  8:45       0         
11.19-5.21_15_min 11/8/2019  9:00       0         
11.19-5.21_15_min 11/8/2019  9:15       0         
11.19-5.21_15_min 11/8/2019  9:30       0         
11.19-5.21_15_min 11/8/2019  9:45       0         
11.19-5.21_15_min 11/8/2019  10:00      0         
11.19-5.21_15_min 11/8/2019  10:15      0         
11.19-5.21_15_min 11/8/2019  10:30      0         
11.19-5.21_15_min 11/8/2019  10:45      0         
11.19-5.21_15_min 11/8/2019  11:00      0         
11.19-5.21_15_min 11/8/2019  11:15      0         
11.19-5.21_15_min 11/8/2019  11:30      0         
11.19-5.21_15_min 11/8/2019  11:45      0         
11.19-5.21_15_min 11/8/2019  12:00      0         
11.19-5.21_15_min 11/8/2019  12:15      0         
11.19-5.21_15_min 11/8/2019  12:30      0         
11.19-5.21_15_min 11/8/2019  12:45      0         
11.19-5.21_15_min 11/8/2019  13:00      0         
11.19-5.21_15_min 11/8/2019  13:15      0         
11.19-5.21_15_min 11/8/2019  13:30      0         
11.19-5.21_15_min 11/8/2019  13:45      0         
11.19-5.21_15_min 11/8/2019  14:00      0         
11.19-5.21_15_min 11/8/2019  14:15      0         
11.19-5.21_15_min 11/8/2019  14:30      0         
11.19-5.21_15_min 11/8/2019  14:45      0         
11.19-5.21_15_min 11/8/2019  15:00      0         
11.19-5.21_15_min 11/8/2019  15:15      0         
11.19-5.21_15_min 11/8/2019  15:30      0         
11.19-5.21_15_min 11/8/2019  15:45      0         
11.19-5.21_15_min 11/8/2019  16:00      0         
11.19-5.21_15_min 11/8/2019  16:15      0         
11.19-5.21_15_min 11/8/2019  16:30      0         
11.19-5.21_15_min 11/8/2019  16:45      0         
11.19-5.21_15_min 11/8/2019  17:00      0         
11.19-5.21_15_min 11/8/2019  17:15      0         
11.19-5.21_15_min 11/8/2019  17:30      0         
11.19-5.21_15_min 11/8/2019  17:45      0         
11.19-5.21_15_min 11/8/2019  18:00      0         
11.19-5.21_15_min 11/8/2019  18:15      0         
11.19-5.21_15_min 11/8/2019  18:30      0         
11.19-5.21_15_min 11/8/2019  18:45      0         
11.19-5.21_15_min 11/8/2019  19:00      0         
11.19-5.21_15_min 11/8/2019  19:15      0         
11.19-5.21_15_min 11/8/2019  19:30      0         
11.19-5.21_15_min 11/8/2019  19:45      0         
11.19-5.21_15_min 11/8/2019  20:00      0         
11.19-5.21_15_min 11/8/2019  20:15      0         
11.19-5.21_15_min 11/8/2019  20:30      0         
11.19-5.21_15_min 11/8/2019  20:45      0         
11.19-5.21_15_min 11/8/2019  21:00      0         
11.19-5.21_15_min 11/8/2019  21:15      0         
11.19-5.21_15_min 11/8/2019  21:30      0         
11.19-5.21_15_min 11/8/2019  21:45      0         
11.19-5.21_15_min 11/8/2019  22:00      0         
11.19-5.21_15_min 11/8/2019  22:15      0         
11.19-5.21_15_min 11/8/2019  22:30      0         
11.19-5.21_15_min 11/8/2019  22:45      0         
11.19-5.21_15_min 11/8/2019  23:00      0         
11.19-5.21_15_min 11/8/2019  23:15      0         
11.19-5.21_15_min 11/8/2019  23:30      0         
11.19-5.21_15_min 11/8/2019  23:45      0         
11.19-5.21_15_min 11/9/2019  0:00       0         
11.19-5.21_15_min 11/9/2019  0:15       0         
11.19-5.21_15_min 11/9/2019  0:30       0         
11.19-5.21_15_min 11/9/2019  0:45       0         
11.19-5.21_15_min 11/9/2019  1:00       0         
11.19-5.21_15_min 11/9/2019  1:15       0         
11.19-5.21_15_min 11/9/2019  1:30       0         
11.19-5.21_15_min 11/9/2019  1:45       0         
11.19-5.21_15_min 11/9/2019  2:00       0         
11.19-5.21_15_min 11/9/2019  2:15       0         
11.19-5.21_15_min 11/9/2019  2:30       0         
11.19-5.21_15_min 11/9/2019  2:45       0         
11.19-5.21_15_min 11/9/2019  3:00       0         
11.19-5.21_15_min 11/9/2019  3:15       0         
11.19-5.21_15_min 11/9/2019  3:30       0         
11.19-5.21_15_min 11/9/2019  3:45       0         
11.19-5.21_15_min 11/9/2019  4:00       0         
11.19-5.21_15_min 11/9/2019  4:15       0         
11.19-5.21_15_min 11/9/2019  4:30       0         
11.19-5.21_15_min 11/9/2019  4:45       0         
11.19-5.21_15_min 11/9/2019  5:00       0         
11.19-5.21_15_min 11/9/2019  5:15       0         
11.19-5.21_15_min 11/9/2019  5:30       0         
11.19-5.21_15_min 11/9/2019  5:45       0         
11.19-5.21_15_min 11/9/2019  6:00       0         
11.19-5.21_15_min 11/9/2019  6:15       0         
11.19-5.21_15_min 11/9/2019  6:30       0         
11.19-5.21_15_min 11/9/2019  6:45       0         
11.19-5.21_15_min 11/9/2019  7:00       0         
11.19-5.21_15_min 11/9/2019  7:15       0         
11.19-5.21_15_min 11/9/2019  7:30       0         
11.19-5.21_15_min 11/9/2019  7:45       0         
11.19-5.21_15_min 11/9/2019  8:00       0         
11.19-5.21_15_min 11/9/2019  8:15       0         
11.19-5.21_15_min 11/9/2019  8:30       0         
11.19-5.21_15_min 11/9/2019  8:45       0         
11.19-5.21_15_min 11/9/2019  9:00       0         
11.19-5.21_15_min 11/9/2019  9:15       0         
11.19-5.21_15_min 11/9/2019  9:30       0         
11.19-5.21_15_min 11/9/2019  9:45       0         
11.19-5.21_15_min 11/9/2019  10:00      0         
11.19-5.21_15_min 11/9/2019  10:15      0         
11.19-5.21_15_min 11/9/2019  10:30      0         
11.19-5.21_15_min 11/9/2019  10:45      0         
11.19-5.21_15_min 11/9/2019  11:00      0         
11.19-5.21_15_min 11/9/2019  11:15      0         
11.19-5.21_15_min 11/9/2019  11:30      0         
11.19-5.21_15_min 11/9/2019  11:45      0         
11.19-5.21_15_min 11/9/2019  12:00      0         
11.19-5.21_15_min 11/9/2019  12:15      0         
11.19-5.21_15_min 11/9/2019  12:30      0         
11.19-5.21_15_min 11/9/2019  12:45      0         
11.19-5.21_15_min 11/9/2019  13:00      0         
11.19-5.21_15_min 11/9/2019  13:15      0         
11.19-5.21_15_min 11/9/2019  13:30      0         
11.19-5.21_15_min 11/9/2019  13:45      0         
11.19-5.21_15_min 11/9/2019  14:00      0         
11.19-5.21_15_min 11/9/2019  14:15      0         
11.19-5.21_15_min 11/9/2019  14:30      0         
11.19-5.21_15_min 11/9/2019  14:45      0         
11.19-5.21_15_min 11/9/2019  15:00      0         
11.19-5.21_15_min 11/9/2019  15:15      0         
11.19-5.21_15_min 11/9/2019  15:30      0         
11.19-5.21_15_min 11/9/2019  15:45      0         
11.19-5.21_15_min 11/9/2019  16:00      0         
11.19-5.21_15_min 11/9/2019  16:15      0         
11.19-5.21_15_min 11/9/2019  16:30      0         
11.19-5.21_15_min 11/9/2019  16:45      0         
11.19-5.21_15_min 11/9/2019  17:00      0         
11.19-5.21_15_min 11/9/2019  17:15      0         
11.19-5.21_15_min 11/9/2019  17:30      0         
11.19-5.21_15_min 11/9/2019  17:45      0         
11.19-5.21_15_min 11/9/2019  18:00      0         
11.19-5.21_15_min 11/9/2019  18:15      0         
11.19-5.21_15_min 11/9/2019  18:30      0         
11.19-5.21_15_min 11/9/2019  18:45      0         
11.19-5.21_15_min 11/9/2019  19:00      0         
11.19-5.21_15_min 11/9/2019  19:15      0         
11.19-5.21_15_min 11/9/2019  19:30      0         
11.19-5.21_15_min 11/9/2019  19:45      0         
11.19-5.21_15_min 11/9/2019  20:00      0         
11.19-5.21_15_min 11/9/2019  20:15      0         
11.19-5.21_15_min 11/9/2019  20:30      0         
11.19-5.21_15_min 11/9/2019  20:45      0         
11.19-5.21_15_min 11/9/2019  21:00      0         
11.19-5.21_15_min 11/9/2019  21:15      0         
11.19-5.21_15_min 11/9/2019  21:30      0         
11.19-5.21_15_min 11/9/2019  21:45      0         
11.19-5.21_15_min 11/9/2019  22:00      0         
11.19-5.21_15_min 11/9/2019  22:15      0         
11.19-5.21_15_min 11/9/2019  22:30      0         
11.19-5.21_15_min 11/9/2019  22:45      0         
11.19-5.21_15_min 11/9/2019  23:00      0         
11.19-5.21_15_min 11/9/2019  23:15      0         
11.19-5.21_15_min 11/9/2019  23:30      0         
11.19-5.21_15_min 11/9/2019  23:45      0         
11.19-5.21_15_min 11/10/2019 0:00       0         
11.19-5.21_15_min 11/10/2019 0:15       0         
11.19-5.21_15_min 11/10/2019 0:30       0         
11.19-5.21_15_min 11/10/2019 0:45       0         
11.19-5.21_15_min 11/10/2019 1:00       0         
11.19-5.21_15_min 11/10/2019 1:15       0         
11.19-5.21_15_min 11/10/2019 1:30       0         
11.19-5.21_15_min 11/10/2019 1:45       0         
11.19-5.21_15_min 11/10/2019 2:00       0         
11.19-5.21_15_min 11/10/2019 2:15       0         
11.19-5.21_15_min 11/10/2019 2:30       0         
11.19-5.21_15_min 11/10/2019 2:45       0         
11.19-5.21_15_min 11/10/2019 3:00       0         
11.19-5.21_15_min 11/10/2019 3:15       0         
11.19-5.21_15_min 11/10/2019 3:30       0         
11.19-5.21_15_min 11/10/2019 3:45       0         
11.19-5.21_15_min 11/10/2019 4:00       0         
11.19-5.21_15_min 11/10/2019 4:15       0         
11.19-5.21_15_min 11/10/2019 4:30       0         
11.19-5.21_15_min 11/10/2019 4:45       0         
11.19-5.21_15_min 11/10/2019 5:00       0         
11.19-5.21_15_min 11/10/2019 5:15       0         
11.19-5.21_15_min 11/10/2019 5:30       0         
11.19-5.21_15_min 11/10/2019 5:45       0         
11.19-5.21_15_min 11/10/2019 6:00       0         
11.19-5.21_15_min 11/10/2019 6:15       0         
11.19-5.21_15_min 11/10/2019 6:30       0         
11.19-5.21_15_min 11/10/2019 6:45       0         
11.19-5.21_15_min 11/10/2019 7:00       0         
11.19-5.21_15_min 11/10/2019 7:15       0         
11.19-5.21_15_min 11/10/2019 7:30       0         
11.19-5.21_15_min 11/10/2019 7:45       0         
11.19-5.21_15_min 11/10/2019 8:00       0         
11.19-5.21_15_min 11/10/2019 8:15       0         
11.19-5.21_15_min 11/10/2019 8:30       0         
11.19-5.21_15_min 11/10/2019 8:45       0         
11.19-5.21_15_min 11/10/2019 9:00       0         
11.19-5.21_15_min 11/10/2019 9:15       0         
11.19-5.21_15_min 11/10/2019 9:30       0         
11.19-5.21_15_min 11/10/2019 9:45       0         
11.19-5.21_15_min 11/10/2019 10:00      0         
11.19-5.21_15_min 11/10/2019 10:15      0         
11.19-5.21_15_min 11/10/2019 10:30      0         
11.19-5.21_15_min 11/10/2019 10:45      0         
11.19-5.21_15_min 11/10/2019 11:00      0         
11.19-5.21_15_min 11/10/2019 11:15      0         
11.19-5.21_15_min 11/10/2019 11:30      0         
11.19-5.21_15_min 11/10/2019 11:45      0         
11.19-5.21_15_min 11/10/2019 12:00      0         
11.19-5.21_15_min 11/10/2019 12:15      0         
11.19-5.21_15_min 11/10/2019 12:30      0         
11.19-5.21_15_min 11/10/2019 12:45      0         
11.19-5.21_15_min 11/10/2019 13:00      0         
11.19-5.21_15_min 11/10/2019 13:15      0         
11.19-5.21_15_min 11/10/2019 13:30      0         
11.19-5.21_15_min 11/10/2019 13:45      0         
11.19-5.21_15_min 11/10/2019 14:00      0         
11.19-5.21_15_min 11/10/2019 14:15      0         
11.19-5.21_15_min 11/10/2019 14:30      0         
11.19-5.21_15_min 11/10/2019 14:45      0         
11.19-5.21_15_min 11/10/2019 15:00      0         
11.19-5.21_15_min 11/10/2019 15:15      0         
11.19-5.21_15_min 11/10/2019 15:30      0         
11.19-5.21_15_min 11/10/2019 15:45      0         
11.19-5.21_15_min 11/10/2019 16:00      0         
11.19-5.21_15_min 11/10/2019 16:15      0         
11.19-5.21_15_min 11/10/2019 16:30      0         
11.19-5.21_15_min 11/10/2019 16:45      0         
11.19-5.21_15_min 11/10/2019 17:00      0         
11.19-5.21_15_min 11/10/2019 17:15      0         
11.19-5.21_15_min 11/10/2019 17:30      0         
11.19-5.21_15_min 11/10/2019 17:45      0         
11.19-5.21_15_min 11/10/2019 18:00      0         
11.19-5.21_15_min 11/10/2019 18:15      0         
11.19-5.21_15_min 11/10/2019 18:30      0         
11.19-5.21_15_min 11/10/2019 18:45      0         
11.19-5.21_15_min 11/10/2019 19:00      0         
11.19-5.21_15_min 11/10/2019 19:15      0         
11.19-5.21_15_min 11/10/2019 19:30      0         
11.19-5.21_15_min 11/10/2019 19:45      0         
11.19-5.21_15_min 11/10/2019 20:00      0         
11.19-5.21_15_min 11/10/2019 20:15      0         
11.19-5.21_15_min 11/10/2019 20:30      0         
11.19-5.21_15_min 11/10/2019 20:45      0         
11.19-5.21_15_min 11/10/2019 21:00      0         
11.19-5.21_15_min 11/10/2019 21:15      0         
11.19-5.21_15_min 11/10/2019 21:30      0         
11.19-5.21_15_min 11/10/2019 21:45      0         
11.19-5.21_15_min 11/10/2019 22:00      0         
11.19-5.21_15_min 11/10/2019 22:15      0         
11.19-5.21_15_min 11/10/2019 22:30      0         
11.19-5.21_15_min 11/10/2019 22:45      0         
11.19-5.21_15_min 11/10/2019 23:00      0         
11.19-5.21_15_min 11/10/2019 23:15      0         
11.19-5.21_15_min 11/10/2019 23:30      0         
11.19-5.21_15_min 11/10/2019 23:45      0         
11.19-5.21_15_min 11/11/2019 0:00       0         
11.19-5.21_15_min 11/11/2019 0:15       0         
11.19-5.21_15_min 11/11/2019 0:30       0         
11.19-5.21_15_min 11/11/2019 0:45       0         
11.19-5.21_15_min 11/11/2019 1:00       0         
11.19-5.21_15_min 11/11/2019 1:15       0         
11.19-5.21_15_min 11/11/2019 1:30       0         
11.19-5.21_15_min 11/11/2019 1:45       0         
11.19-5.21_15_min 11/11/2019 2:00       0         
11.19-5.21_15_min 11/11/2019 2:15       0         
11.19-5.21_15_min 11/11/2019 2:30       0         
11.19-5.21_15_min 11/11/2019 2:45       0         
11.19-5.21_15_min 11/11/2019 3:00       0         
11.19-5.21_15_min 11/11/2019 3:15       0         
11.19-5.21_15_min 11/11/2019 3:30       0         
11.19-5.21_15_min 11/11/2019 3:45       0         
11.19-5.21_15_min 11/11/2019 4:00       0         
11.19-5.21_15_min 11/11/2019 4:15       0         
11.19-5.21_15_min 11/11/2019 4:30       0         
11.19-5.21_15_min 11/11/2019 4:45       0         
11.19-5.21_15_min 11/11/2019 5:00       0         
11.19-5.21_15_min 11/11/2019 5:15       0         
11.19-5.21_15_min 11/11/2019 5:30       0         
11.19-5.21_15_min 11/11/2019 5:45       0         
11.19-5.21_15_min 11/11/2019 6:00       0         
11.19-5.21_15_min 11/11/2019 6:15       0         
11.19-5.21_15_min 11/11/2019 6:30       0         
11.19-5.21_15_min 11/11/2019 6:45       0         
11.19-5.21_15_min 11/11/2019 7:00       0         
11.19-5.21_15_min 11/11/2019 7:15       0         
11.19-5.21_15_min 11/11/2019 7:30       0         
11.19-5.21_15_min 11/11/2019 7:45       0         
11.19-5.21_15_min 11/11/2019 8:00       0         
11.19-5.21_15_min 11/11/2019 8:15       0         
11.19-5.21_15_min 11/11/2019 8:30       0         
11.19-5.21_15_min 11/11/2019 8:45       0         
11.19-5.21_15_min 11/11/2019 9:00       0         
11.19-5.21_15_min 11/11/2019 9:15       0         
11.19-5.21_15_min 11/11/2019 9:30       0         
11.19-5.21_15_min 11/11/2019 9:45       0         
11.19-5.21_15_min 11/11/2019 10:00      0         
11.19-5.21_15_min 11/11/2019 10:15      0         
11.19-5.21_15_min 11/11/2019 10:30      0         
11.19-5.21_15_min 11/11/2019 10:45      0         
11.19-5.21_15_min 11/11/2019 11:00      0         
11.19-5.21_15_min 11/11/2019 11:15      0         
11.19-5.21_15_min 11/11/2019 11:30      0         
11.19-5.21_15_min 11/11/2019 11:45      0         
11.19-5.21_15_min 11/11/2019 12:00      0         
11.19-5.21_15_min 11/11/2019 12:15      0         
11.19-5.21_15_min 11/11/2019 12:30      0         
11.19-5.21_15_min 11/11/2019 12:45      0         
11.19-5.21_15_min 11/11/2019 13:00      0         
11.19-5.21_15_min 11/11/2019 13:15      0         
11.19-5.21_15_min 11/11/2019 13:30      0         
11.19-5.21_15_min 11/11/2019 13:45      0         
11.19-5.21_15_min 11/11/2019 14:00      0         
11.19-5.21_15_min 11/11/2019 14:15      0         
11.19-5.21_15_min 11/11/2019 14:30      0         
11.19-5.21_15_min 11/11/2019 14:45      0         
11.19-5.21_15_min 11/11/2019 15:00      0         
11.19-5.21_15_min 11/11/2019 15:15      0         
11.19-5.21_15_min 11/11/2019 15:30      0         
11.19-5.21_15_min 11/11/2019 15:45      0         
11.19-5.21_15_min 11/11/2019 16:00      0         
11.19-5.21_15_min 11/11/2019 16:15      0         
11.19-5.21_15_min 11/11/2019 16:30      0         
11.19-5.21_15_min 11/11/2019 16:45      0         
11.19-5.21_15_min 11/11/2019 17:00      0         
11.19-5.21_15_min 11/11/2019 17:15      0         
11.19-5.21_15_min 11/11/2019 17:30      0         
11.19-5.21_15_min 11/11/2019 17:45      0         
11.19-5.21_15_min 11/11/2019 18:00      0         
11.19-5.21_15_min 11/11/2019 18:15      0         
11.19-5.21_15_min 11/11/2019 18:30      0         
11.19-5.21_15_min 11/11/2019 18:45      0         
11.19-5.21_15_min 11/11/2019 19:00      0         
11.19-5.21_15_min 11/11/2019 19:15      0         
11.19-5.21_15_min 11/11/2019 19:30      0         
11.19-5.21_15_min 11/11/2019 19:45      0         
11.19-5.21_15_min 11/11/2019 20:00      0         
11.19-5.21_15_min 11/11/2019 20:15      0         
11.19-5.21_15_min 11/11/2019 20:30      0         
11.19-5.21_15_min 11/11/2019 20:45      0         
11.19-5.21_15_min 11/11/2019 21:00      0         
11.19-5.21_15_min 11/11/2019 21:15      0         
11.19-5.21_15_min 11/11/2019 21:30      0         
11.19-5.21_15_min 11/11/2019 21:45      0         
11.19-5.21_15_min 11/11/2019 22:00      0         
11.19-5.21_15_min 11/11/2019 22:15      0         
11.19-5.21_15_min 11/11/2019 22:30      0         
11.19-5.21_15_min 11/11/2019 22:45      0         
11.19-5.21_15_min 11/11/2019 23:00      0         
11.19-5.21_15_min 11/11/2019 23:15      0         
11.19-5.21_15_min 11/11/2019 23:30      0         
11.19-5.21_15_min 11/11/2019 23:45      0         
11.19-5.21_15_min 11/12/2019 0:00       0         
11.19-5.21_15_min 11/12/2019 0:15       0         
11.19-5.21_15_min 11/12/2019 0:30       0         
11.19-5.21_15_min 11/12/2019 0:45       0         
11.19-5.21_15_min 11/12/2019 1:00       0         
11.19-5.21_15_min 11/12/2019 1:15       0         
11.19-5.21_15_min 11/12/2019 1:30       0         
11.19-5.21_15_min 11/12/2019 1:45       0         
11.19-5.21_15_min 11/12/2019 2:00       0         
11.19-5.21_15_min 11/12/2019 2:15       0         
11.19-5.21_15_min 11/12/2019 2:30       0         
11.19-5.21_15_min 11/12/2019 2:45       0         
11.19-5.21_15_min 11/12/2019 3:00       0         
11.19-5.21_15_min 11/12/2019 3:15       0         
11.19-5.21_15_min 11/12/2019 3:30       0         
11.19-5.21_15_min 11/12/2019 3:45       0         
11.19-5.21_15_min 11/12/2019 4:00       0         
11.19-5.21_15_min 11/12/2019 4:15       0         
11.19-5.21_15_min 11/12/2019 4:30       0         
11.19-5.21_15_min 11/12/2019 4:45       0         
11.19-5.21_15_min 11/12/2019 5:00       0         
11.19-5.21_15_min 11/12/2019 5:15       0         
11.19-5.21_15_min 11/12/2019 5:30       0         
11.19-5.21_15_min 11/12/2019 5:45       0         
11.19-5.21_15_min 11/12/2019 6:00       0         
11.19-5.21_15_min 11/12/2019 6:15       0         
11.19-5.21_15_min 11/12/2019 6:30       0         
11.19-5.21_15_min 11/12/2019 6:45       0         
11.19-5.21_15_min 11/12/2019 7:00       0         
11.19-5.21_15_min 11/12/2019 7:15       0         
11.19-5.21_15_min 11/12/2019 7:30       0         
11.19-5.21_15_min 11/12/2019 7:45       0         
11.19-5.21_15_min 11/12/2019 8:00       0         
11.19-5.21_15_min 11/12/2019 8:15       0         
11.19-5.21_15_min 11/12/2019 8:30       0         
11.19-5.21_15_min 11/12/2019 8:45       0         
11.19-5.21_15_min 11/12/2019 9:00       0         
11.19-5.21_15_min 11/12/2019 9:15       0.01      
11.19-5.21_15_min 11/12/2019 9:30       0         
11.19-5.21_15_min 11/12/2019 9:45       0.01      
11.19-5.21_15_min 11/12/2019 10:00      0         
11.19-5.21_15_min 11/12/2019 10:15      0         
11.19-5.21_15_min 11/12/2019 10:30      0         
11.19-5.21_15_min 11/12/2019 10:45      0         
11.19-5.21_15_min 11/12/2019 11:00      0         
11.19-5.21_15_min 11/12/2019 11:15      0         
11.19-5.21_15_min 11/12/2019 11:30      0         
11.19-5.21_15_min 11/12/2019 11:45      0         
11.19-5.21_15_min 11/12/2019 12:00      0         
11.19-5.21_15_min 11/12/2019 12:15      0         
11.19-5.21_15_min 11/12/2019 12:30      0         
11.19-5.21_15_min 11/12/2019 12:45      0         
11.19-5.21_15_min 11/12/2019 13:00      0         
11.19-5.21_15_min 11/12/2019 13:15      0         
11.19-5.21_15_min 11/12/2019 13:30      0         
11.19-5.21_15_min 11/12/2019 13:45      0         
11.19-5.21_15_min 11/12/2019 14:00      0         
11.19-5.21_15_min 11/12/2019 14:15      0         
11.19-5.21_15_min 11/12/2019 14:30      0         
11.19-5.21_15_min 11/12/2019 14:45      0         
11.19-5.21_15_min 11/12/2019 15:00      0         
11.19-5.21_15_min 11/12/2019 15:15      0         
11.19-5.21_15_min 11/12/2019 15:30      0         
11.19-5.21_15_min 11/12/2019 15:45      0         
11.19-5.21_15_min 11/12/2019 16:00      0         
11.19-5.21_15_min 11/12/2019 16:15      0         
11.19-5.21_15_min 11/12/2019 16:30      0         
11.19-5.21_15_min 11/12/2019 16:45      0         
11.19-5.21_15_min 11/12/2019 17:00      0         
11.19-5.21_15_min 11/12/2019 17:15      0         
11.19-5.21_15_min 11/12/2019 17:30      0         
11.19-5.21_15_min 11/12/2019 17:45      0         
11.19-5.21_15_min 11/12/2019 18:00      0         
11.19-5.21_15_min 11/12/2019 18:15      0         
11.19-5.21_15_min 11/12/2019 18:30      0         
11.19-5.21_15_min 11/12/2019 18:45      0         
11.19-5.21_15_min 11/12/2019 19:00      0         
11.19-5.21_15_min 11/12/2019 19:15      0         
11.19-5.21_15_min 11/12/2019 19:30      0         
11.19-5.21_15_min 11/12/2019 19:45      0         
11.19-5.21_15_min 11/12/2019 20:00      0         
11.19-5.21_15_min 11/12/2019 20:15      0         
11.19-5.21_15_min 11/12/2019 20:30      0         
11.19-5.21_15_min 11/12/2019 20:45      0         
11.19-5.21_15_min 11/12/2019 21:00      0         
11.19-5.21_15_min 11/12/2019 21:15      0         
11.19-5.21_15_min 11/12/2019 21:30      0         
11.19-5.21_15_min 11/12/2019 21:45      0         
11.19-5.21_15_min 11/12/2019 22:00      0         
11.19-5.21_15_min 11/12/2019 22:15      0         
11.19-5.21_15_min 11/12/2019 22:30      0         
11.19-5.21_15_min 11/12/2019 22:45      0         
11.19-5.21_15_min 11/12/2019 23:00      0         
11.19-5.21_15_min 11/12/2019 23:15      0         
11.19-5.21_15_min 11/12/2019 23:30      0         
11.19-5.21_15_min 11/12/2019 23:45      0         
11.19-5.21_15_min 11/13/2019 0:00       0         
11.19-5.21_15_min 11/13/2019 0:15       0         
11.19-5.21_15_min 11/13/2019 0:30       0         
11.19-5.21_15_min 11/13/2019 0:45       0         
11.19-5.21_15_min 11/13/2019 1:00       0         
11.19-5.21_15_min 11/13/2019 1:15       0         
11.19-5.21_15_min 11/13/2019 1:30       0         
11.19-5.21_15_min 11/13/2019 1:45       0         
11.19-5.21_15_min 11/13/2019 2:00       0         
11.19-5.21_15_min 11/13/2019 2:15       0         
11.19-5.21_15_min 11/13/2019 2:30       0         
11.19-5.21_15_min 11/13/2019 2:45       0         
11.19-5.21_15_min 11/13/2019 3:00       0         
11.19-5.21_15_min 11/13/2019 3:15       0         
11.19-5.21_15_min 11/13/2019 3:30       0         
11.19-5.21_15_min 11/13/2019 3:45       0         
11.19-5.21_15_min 11/13/2019 4:00       0         
11.19-5.21_15_min 11/13/2019 4:15       0         
11.19-5.21_15_min 11/13/2019 4:30       0         
11.19-5.21_15_min 11/13/2019 4:45       0         
11.19-5.21_15_min 11/13/2019 5:00       0         
11.19-5.21_15_min 11/13/2019 5:15       0         
11.19-5.21_15_min 11/13/2019 5:30       0         
11.19-5.21_15_min 11/13/2019 5:45       0         
11.19-5.21_15_min 11/13/2019 6:00       0         
11.19-5.21_15_min 11/13/2019 6:15       0         
11.19-5.21_15_min 11/13/2019 6:30       0         
11.19-5.21_15_min 11/13/2019 6:45       0         
11.19-5.21_15_min 11/13/2019 7:00       0         
11.19-5.21_15_min 11/13/2019 7:15       0         
11.19-5.21_15_min 11/13/2019 7:30       0         
11.19-5.21_15_min 11/13/2019 7:45       0         
11.19-5.21_15_min 11/13/2019 8:00       0         
11.19-5.21_15_min 11/13/2019 8:15       0         
11.19-5.21_15_min 11/13/2019 8:30       0         
11.19-5.21_15_min 11/13/2019 8:45       0         
11.19-5.21_15_min 11/13/2019 9:00       0         
11.19-5.21_15_min 11/13/2019 9:15       0         
11.19-5.21_15_min 11/13/2019 9:30       0         
11.19-5.21_15_min 11/13/2019 9:45       0         
11.19-5.21_15_min 11/13/2019 10:00      0         
11.19-5.21_15_min 11/13/2019 10:15      0         
11.19-5.21_15_min 11/13/2019 10:30      0         
11.19-5.21_15_min 11/13/2019 10:45      0         
11.19-5.21_15_min 11/13/2019 11:00      0         
11.19-5.21_15_min 11/13/2019 11:15      0         
11.19-5.21_15_min 11/13/2019 11:30      0         
11.19-5.21_15_min 11/13/2019 11:45      0         
11.19-5.21_15_min 11/13/2019 12:00      0         
11.19-5.21_15_min 11/13/2019 12:15      0         
11.19-5.21_15_min 11/13/2019 12:30      0         
11.19-5.21_15_min 11/13/2019 12:45      0         
11.19-5.21_15_min 11/13/2019 13:00      0         
11.19-5.21_15_min 11/13/2019 13:15      0         
11.19-5.21_15_min 11/13/2019 13:30      0         
11.19-5.21_15_min 11/13/2019 13:45      0         
11.19-5.21_15_min 11/13/2019 14:00      0         
11.19-5.21_15_min 11/13/2019 14:15      0         
11.19-5.21_15_min 11/13/2019 14:30      0         
11.19-5.21_15_min 11/13/2019 14:45      0         
11.19-5.21_15_min 11/13/2019 15:00      0         
11.19-5.21_15_min 11/13/2019 15:15      0         
11.19-5.21_15_min 11/13/2019 15:30      0         
11.19-5.21_15_min 11/13/2019 15:45      0         
11.19-5.21_15_min 11/13/2019 16:00      0         
11.19-5.21_15_min 11/13/2019 16:15      0         
11.19-5.21_15_min 11/13/2019 16:30      0         
11.19-5.21_15_min 11/13/2019 16:45      0         
11.19-5.21_15_min 11/13/2019 17:00      0         
11.19-5.21_15_min 11/13/2019 17:15      0         
11.19-5.21_15_min 11/13/2019 17:30      0         
11.19-5.21_15_min 11/13/2019 17:45      0         
11.19-5.21_15_min 11/13/2019 18:00      0         
11.19-5.21_15_min 11/13/2019 18:15      0         
11.19-5.21_15_min 11/13/2019 18:30      0         
11.19-5.21_15_min 11/13/2019 18:45      0         
11.19-5.21_15_min 11/13/2019 19:00      0         
11.19-5.21_15_min 11/13/2019 19:15      0         
11.19-5.21_15_min 11/13/2019 19:30      0         
11.19-5.21_15_min 11/13/2019 19:45      0         
11.19-5.21_15_min 11/13/2019 20:00      0         
11.19-5.21_15_min 11/13/2019 20:15      0         
11.19-5.21_15_min 11/13/2019 20:30      0         
11.19-5.21_15_min 11/13/2019 20:45      0         
11.19-5.21_15_min 11/13/2019 21:00      0         
11.19-5.21_15_min 11/13/2019 21:15      0         
11.19-5.21_15_min 11/13/2019 21:30      0         
11.19-5.21_15_min 11/13/2019 21:45      0         
11.19-5.21_15_min 11/13/2019 22:00      0         
11.19-5.21_15_min 11/13/2019 22:15      0         
11.19-5.21_15_min 11/13/2019 22:30      0         
11.19-5.21_15_min 11/13/2019 22:45      0         
11.19-5.21_15_min 11/13/2019 23:00      0         
11.19-5.21_15_min 11/13/2019 23:15      0         
11.19-5.21_15_min 11/13/2019 23:30      0         
11.19-5.21_15_min 11/13/2019 23:45      0         
11.19-5.21_15_min 11/14/2019 0:00       0         
11.19-5.21_15_min 11/14/2019 0:15       0         
11.19-5.21_15_min 11/14/2019 0:30       0         
11.19-5.21_15_min 11/14/2019 0:45       0         
11.19-5.21_15_min 11/14/2019 1:00       0         
11.19-5.21_15_min 11/14/2019 1:15       0         
11.19-5.21_15_min 11/14/2019 1:30       0         
11.19-5.21_15_min 11/14/2019 1:45       0         
11.19-5.21_15_min 11/14/2019 2:00       0         
11.19-5.21_15_min 11/14/2019 2:15       0         
11.19-5.21_15_min 11/14/2019 2:30       0         
11.19-5.21_15_min 11/14/2019 2:45       0         
11.19-5.21_15_min 11/14/2019 3:00       0         
11.19-5.21_15_min 11/14/2019 3:15       0         
11.19-5.21_15_min 11/14/2019 3:30       0         
11.19-5.21_15_min 11/14/2019 3:45       0         
11.19-5.21_15_min 11/14/2019 4:00       0         
11.19-5.21_15_min 11/14/2019 4:15       0         
11.19-5.21_15_min 11/14/2019 4:30       0         
11.19-5.21_15_min 11/14/2019 4:45       0         
11.19-5.21_15_min 11/14/2019 5:00       0         
11.19-5.21_15_min 11/14/2019 5:15       0         
11.19-5.21_15_min 11/14/2019 5:30       0         
11.19-5.21_15_min 11/14/2019 5:45       0         
11.19-5.21_15_min 11/14/2019 6:00       0         
11.19-5.21_15_min 11/14/2019 6:15       0         
11.19-5.21_15_min 11/14/2019 6:30       0         
11.19-5.21_15_min 11/14/2019 6:45       0         
11.19-5.21_15_min 11/14/2019 7:00       0         
11.19-5.21_15_min 11/14/2019 7:15       0         
11.19-5.21_15_min 11/14/2019 7:30       0         
11.19-5.21_15_min 11/14/2019 7:45       0         
11.19-5.21_15_min 11/14/2019 8:00       0         
11.19-5.21_15_min 11/14/2019 8:15       0         
11.19-5.21_15_min 11/14/2019 8:30       0         
11.19-5.21_15_min 11/14/2019 8:45       0         
11.19-5.21_15_min 11/14/2019 9:00       0         
11.19-5.21_15_min 11/14/2019 9:15       0         
11.19-5.21_15_min 11/14/2019 9:30       0         
11.19-5.21_15_min 11/14/2019 9:45       0         
11.19-5.21_15_min 11/14/2019 10:00      0         
11.19-5.21_15_min 11/14/2019 10:15      0         
11.19-5.21_15_min 11/14/2019 10:30      0         
11.19-5.21_15_min 11/14/2019 10:45      0         
11.19-5.21_15_min 11/14/2019 11:00      0         
11.19-5.21_15_min 11/14/2019 11:15      0         
11.19-5.21_15_min 11/14/2019 11:30      0         
11.19-5.21_15_min 11/14/2019 11:45      0         
11.19-5.21_15_min 11/14/2019 12:00      0         
11.19-5.21_15_min 11/14/2019 12:15      0         
11.19-5.21_15_min 11/14/2019 12:30      0         
11.19-5.21_15_min 11/14/2019 12:45      0         
11.19-5.21_15_min 11/14/2019 13:00      0         
11.19-5.21_15_min 11/14/2019 13:15      0         
11.19-5.21_15_min 11/14/2019 13:30      0         
11.19-5.21_15_min 11/14/2019 13:45      0         
11.19-5.21_15_min 11/14/2019 14:00      0         
11.19-5.21_15_min 11/14/2019 14:15      0         
11.19-5.21_15_min 11/14/2019 14:30      0         
11.19-5.21_15_min 11/14/2019 14:45      0         
11.19-5.21_15_min 11/14/2019 15:00      0         
11.19-5.21_15_min 11/14/2019 15:15      0         
11.19-5.21_15_min 11/14/2019 15:30      0         
11.19-5.21_15_min 11/14/2019 15:45      0         
11.19-5.21_15_min 11/14/2019 16:00      0         
11.19-5.21_15_min 11/14/2019 16:15      0         
11.19-5.21_15_min 11/14/2019 16:30      0         
11.19-5.21_15_min 11/14/2019 16:45      0         
11.19-5.21_15_min 11/14/2019 17:00      0         
11.19-5.21_15_min 11/14/2019 17:15      0         
11.19-5.21_15_min 11/14/2019 17:30      0         
11.19-5.21_15_min 11/14/2019 17:45      0         
11.19-5.21_15_min 11/14/2019 18:00      0         
11.19-5.21_15_min 11/14/2019 18:15      0         
11.19-5.21_15_min 11/14/2019 18:30      0         
11.19-5.21_15_min 11/14/2019 18:45      0         
11.19-5.21_15_min 11/14/2019 19:00      0         
11.19-5.21_15_min 11/14/2019 19:15      0         
11.19-5.21_15_min 11/14/2019 19:30      0         
11.19-5.21_15_min 11/14/2019 19:45      0         
11.19-5.21_15_min 11/14/2019 20:00      0         
11.19-5.21_15_min 11/14/2019 20:15      0         
11.19-5.21_15_min 11/14/2019 20:30      0         
11.19-5.21_15_min 11/14/2019 20:45      0         
11.19-5.21_15_min 11/14/2019 21:00      0         
11.19-5.21_15_min 11/14/2019 21:15      0         
11.19-5.21_15_min 11/14/2019 21:30      0         
11.19-5.21_15_min 11/14/2019 21:45      0         
11.19-5.21_15_min 11/14/2019 22:00      0         
11.19-5.21_15_min 11/14/2019 22:15      0         
11.19-5.21_15_min 11/14/2019 22:30      0         
11.19-5.21_15_min 11/14/2019 22:45      0         
11.19-5.21_15_min 11/14/2019 23:00      0         
11.19-5.21_15_min 11/14/2019 23:15      0         
11.19-5.21_15_min 11/14/2019 23:30      0         
11.19-5.21_15_min 11/14/2019 23:45      0         
11.19-5.21_15_min 11/15/2019 0:00       0         
11.19-5.21_15_min 11/15/2019 0:15       0         
11.19-5.21_15_min 11/15/2019 0:30       0         
11.19-5.21_15_min 11/15/2019 0:45       0         
11.19-5.21_15_min 11/15/2019 1:00       0         
11.19-5.21_15_min 11/15/2019 1:15       0         
11.19-5.21_15_min 11/15/2019 1:30       0         
11.19-5.21_15_min 11/15/2019 1:45       0         
11.19-5.21_15_min 11/15/2019 2:00       0         
11.19-5.21_15_min 11/15/2019 2:15       0         
11.19-5.21_15_min 11/15/2019 2:30       0         
11.19-5.21_15_min 11/15/2019 2:45       0         
11.19-5.21_15_min 11/15/2019 3:00       0         
11.19-5.21_15_min 11/15/2019 3:15       0         
11.19-5.21_15_min 11/15/2019 3:30       0         
11.19-5.21_15_min 11/15/2019 3:45       0         
11.19-5.21_15_min 11/15/2019 4:00       0         
11.19-5.21_15_min 11/15/2019 4:15       0         
11.19-5.21_15_min 11/15/2019 4:30       0         
11.19-5.21_15_min 11/15/2019 4:45       0         
11.19-5.21_15_min 11/15/2019 5:00       0         
11.19-5.21_15_min 11/15/2019 5:15       0         
11.19-5.21_15_min 11/15/2019 5:30       0         
11.19-5.21_15_min 11/15/2019 5:45       0         
11.19-5.21_15_min 11/15/2019 6:00       0         
11.19-5.21_15_min 11/15/2019 6:15       0         
11.19-5.21_15_min 11/15/2019 6:30       0         
11.19-5.21_15_min 11/15/2019 6:45       0         
11.19-5.21_15_min 11/15/2019 7:00       0         
11.19-5.21_15_min 11/15/2019 7:15       0         
11.19-5.21_15_min 11/15/2019 7:30       0         
11.19-5.21_15_min 11/15/2019 7:45       0         
11.19-5.21_15_min 11/15/2019 8:00       0         
11.19-5.21_15_min 11/15/2019 8:15       0         
11.19-5.21_15_min 11/15/2019 8:30       0         
11.19-5.21_15_min 11/15/2019 8:45       0         
11.19-5.21_15_min 11/15/2019 9:00       0         
11.19-5.21_15_min 11/15/2019 9:15       0         
11.19-5.21_15_min 11/15/2019 9:30       0         
11.19-5.21_15_min 11/15/2019 9:45       0         
11.19-5.21_15_min 11/15/2019 10:00      0         
11.19-5.21_15_min 11/15/2019 10:15      0         
11.19-5.21_15_min 11/15/2019 10:30      0         
11.19-5.21_15_min 11/15/2019 10:45      0         
11.19-5.21_15_min 11/15/2019 11:00      0         
11.19-5.21_15_min 11/15/2019 11:15      0         
11.19-5.21_15_min 11/15/2019 11:30      0         
11.19-5.21_15_min 11/15/2019 11:45      0         
11.19-5.21_15_min 11/15/2019 12:00      0         
11.19-5.21_15_min 11/15/2019 12:15      0         
11.19-5.21_15_min 11/15/2019 12:30      0         
11.19-5.21_15_min 11/15/2019 12:45      0         
11.19-5.21_15_min 11/15/2019 13:00      0         
11.19-5.21_15_min 11/15/2019 13:15      0         
11.19-5.21_15_min 11/15/2019 13:30      0         
11.19-5.21_15_min 11/15/2019 13:45      0         
11.19-5.21_15_min 11/15/2019 14:00      0         
11.19-5.21_15_min 11/15/2019 14:15      0         
11.19-5.21_15_min 11/15/2019 14:30      0         
11.19-5.21_15_min 11/15/2019 14:45      0         
11.19-5.21_15_min 11/15/2019 15:00      0         
11.19-5.21_15_min 11/15/2019 15:15      0         
11.19-5.21_15_min 11/15/2019 15:30      0         
11.19-5.21_15_min 11/15/2019 15:45      0         
11.19-5.21_15_min 11/15/2019 16:00      0         
11.19-5.21_15_min 11/15/2019 16:15      0         
11.19-5.21_15_min 11/15/2019 16:30      0         
11.19-5.21_15_min 11/15/2019 16:45      0         
11.19-5.21_15_min 11/15/2019 17:00      0         
11.19-5.21_15_min 11/15/2019 17:15      0         
11.19-5.21_15_min 11/15/2019 17:30      0         
11.19-5.21_15_min 11/15/2019 17:45      0         
11.19-5.21_15_min 11/15/2019 18:00      0         
11.19-5.21_15_min 11/15/2019 18:15      0         
11.19-5.21_15_min 11/15/2019 18:30      0         
11.19-5.21_15_min 11/15/2019 18:45      0         
11.19-5.21_15_min 11/15/2019 19:00      0         
11.19-5.21_15_min 11/15/2019 19:15      0         
11.19-5.21_15_min 11/15/2019 19:30      0         
11.19-5.21_15_min 11/15/2019 19:45      0         
11.19-5.21_15_min 11/15/2019 20:00      0         
11.19-5.21_15_min 11/15/2019 20:15      0         
11.19-5.21_15_min 11/15/2019 20:30      0         
11.19-5.21_15_min 11/15/2019 20:45      0         
11.19-5.21_15_min 11/15/2019 21:00      0         
11.19-5.21_15_min 11/15/2019 21:15      0         
11.19-5.21_15_min 11/15/2019 21:30      0         
11.19-5.21_15_min 11/15/2019 21:45      0         
11.19-5.21_15_min 11/15/2019 22:00      0         
11.19-5.21_15_min 11/15/2019 22:15      0         
11.19-5.21_15_min 11/15/2019 22:30      0         
11.19-5.21_15_min 11/15/2019 22:45      0         
11.19-5.21_15_min 11/15/2019 23:00      0         
11.19-5.21_15_min 11/15/2019 23:15      0         
11.19-5.21_15_min 11/15/2019 23:30      0         
11.19-5.21_15_min 11/15/2019 23:45      0         
11.19-5.21_15_min 11/16/2019 0:00       0         
11.19-5.21_15_min 11/16/2019 0:15       0         
11.19-5.21_15_min 11/16/2019 0:30       0         
11.19-5.21_15_min 11/16/2019 0:45       0         
11.19-5.21_15_min 11/16/2019 1:00       0         
11.19-5.21_15_min 11/16/2019 1:15       0         
11.19-5.21_15_min 11/16/2019 1:30       0         
11.19-5.21_15_min 11/16/2019 1:45       0         
11.19-5.21_15_min 11/16/2019 2:00       0         
11.19-5.21_15_min 11/16/2019 2:15       0         
11.19-5.21_15_min 11/16/2019 2:30       0         
11.19-5.21_15_min 11/16/2019 2:45       0         
11.19-5.21_15_min 11/16/2019 3:00       0         
11.19-5.21_15_min 11/16/2019 3:15       0         
11.19-5.21_15_min 11/16/2019 3:30       0         
11.19-5.21_15_min 11/16/2019 3:45       0         
11.19-5.21_15_min 11/16/2019 4:00       0         
11.19-5.21_15_min 11/16/2019 4:15       0         
11.19-5.21_15_min 11/16/2019 4:30       0         
11.19-5.21_15_min 11/16/2019 4:45       0         
11.19-5.21_15_min 11/16/2019 5:00       0         
11.19-5.21_15_min 11/16/2019 5:15       0         
11.19-5.21_15_min 11/16/2019 5:30       0         
11.19-5.21_15_min 11/16/2019 5:45       0         
11.19-5.21_15_min 11/16/2019 6:00       0         
11.19-5.21_15_min 11/16/2019 6:15       0         
11.19-5.21_15_min 11/16/2019 6:30       0         
11.19-5.21_15_min 11/16/2019 6:45       0         
11.19-5.21_15_min 11/16/2019 7:00       0         
11.19-5.21_15_min 11/16/2019 7:15       0         
11.19-5.21_15_min 11/16/2019 7:30       0         
11.19-5.21_15_min 11/16/2019 7:45       0         
11.19-5.21_15_min 11/16/2019 8:00       0         
11.19-5.21_15_min 11/16/2019 8:15       0         
11.19-5.21_15_min 11/16/2019 8:30       0         
11.19-5.21_15_min 11/16/2019 8:45       0         
11.19-5.21_15_min 11/16/2019 9:00       0         
11.19-5.21_15_min 11/16/2019 9:15       0         
11.19-5.21_15_min 11/16/2019 9:30       0         
11.19-5.21_15_min 11/16/2019 9:45       0         
11.19-5.21_15_min 11/16/2019 10:00      0         
11.19-5.21_15_min 11/16/2019 10:15      0         
11.19-5.21_15_min 11/16/2019 10:30      0         
11.19-5.21_15_min 11/16/2019 10:45      0         
11.19-5.21_15_min 11/16/2019 11:00      0         
11.19-5.21_15_min 11/16/2019 11:15      0         
11.19-5.21_15_min 11/16/2019 11:30      0         
11.19-5.21_15_min 11/16/2019 11:45      0         
11.19-5.21_15_min 11/16/2019 12:00      0         
11.19-5.21_15_min 11/16/2019 12:15      0         
11.19-5.21_15_min 11/16/2019 12:30      0         
11.19-5.21_15_min 11/16/2019 12:45      0         
11.19-5.21_15_min 11/16/2019 13:00      0         
11.19-5.21_15_min 11/16/2019 13:15      0         
11.19-5.21_15_min 11/16/2019 13:30      0         
11.19-5.21_15_min 11/16/2019 13:45      0         
11.19-5.21_15_min 11/16/2019 14:00      0         
11.19-5.21_15_min 11/16/2019 14:15      0         
11.19-5.21_15_min 11/16/2019 14:30      0         
11.19-5.21_15_min 11/16/2019 14:45      0         
11.19-5.21_15_min 11/16/2019 15:00      0         
11.19-5.21_15_min 11/16/2019 15:15      0         
11.19-5.21_15_min 11/16/2019 15:30      0         
11.19-5.21_15_min 11/16/2019 15:45      0         
11.19-5.21_15_min 11/16/2019 16:00      0         
11.19-5.21_15_min 11/16/2019 16:15      0         
11.19-5.21_15_min 11/16/2019 16:30      0         
11.19-5.21_15_min 11/16/2019 16:45      0         
11.19-5.21_15_min 11/16/2019 17:00      0         
11.19-5.21_15_min 11/16/2019 17:15      0         
11.19-5.21_15_min 11/16/2019 17:30      0         
11.19-5.21_15_min 11/16/2019 17:45      0         
11.19-5.21_15_min 11/16/2019 18:00      0         
11.19-5.21_15_min 11/16/2019 18:15      0         
11.19-5.21_15_min 11/16/2019 18:30      0         
11.19-5.21_15_min 11/16/2019 18:45      0         
11.19-5.21_15_min 11/16/2019 19:00      0         
11.19-5.21_15_min 11/16/2019 19:15      0         
11.19-5.21_15_min 11/16/2019 19:30      0         
11.19-5.21_15_min 11/16/2019 19:45      0         
11.19-5.21_15_min 11/16/2019 20:00      0         
11.19-5.21_15_min 11/16/2019 20:15      0         
11.19-5.21_15_min 11/16/2019 20:30      0         
11.19-5.21_15_min 11/16/2019 20:45      0         
11.19-5.21_15_min 11/16/2019 21:00      0         
11.19-5.21_15_min 11/16/2019 21:15      0         
11.19-5.21_15_min 11/16/2019 21:30      0         
11.19-5.21_15_min 11/16/2019 21:45      0         
11.19-5.21_15_min 11/16/2019 22:00      0         
11.19-5.21_15_min 11/16/2019 22:15      0         
11.19-5.21_15_min 11/16/2019 22:30      0         
11.19-5.21_15_min 11/16/2019 22:45      0         
11.19-5.21_15_min 11/16/2019 23:00      0         
11.19-5.21_15_min 11/16/2019 23:15      0         
11.19-5.21_15_min 11/16/2019 23:30      0         
11.19-5.21_15_min 11/16/2019 23:45      0         
11.19-5.21_15_min 11/17/2019 0:00       0         
11.19-5.21_15_min 11/17/2019 0:15       0         
11.19-5.21_15_min 11/17/2019 0:30       0         
11.19-5.21_15_min 11/17/2019 0:45       0         
11.19-5.21_15_min 11/17/2019 1:00       0         
11.19-5.21_15_min 11/17/2019 1:15       0         
11.19-5.21_15_min 11/17/2019 1:30       0         
11.19-5.21_15_min 11/17/2019 1:45       0         
11.19-5.21_15_min 11/17/2019 2:00       0         
11.19-5.21_15_min 11/17/2019 2:15       0         
11.19-5.21_15_min 11/17/2019 2:30       0         
11.19-5.21_15_min 11/17/2019 2:45       0         
11.19-5.21_15_min 11/17/2019 3:00       0         
11.19-5.21_15_min 11/17/2019 3:15       0         
11.19-5.21_15_min 11/17/2019 3:30       0         
11.19-5.21_15_min 11/17/2019 3:45       0         
11.19-5.21_15_min 11/17/2019 4:00       0         
11.19-5.21_15_min 11/17/2019 4:15       0         
11.19-5.21_15_min 11/17/2019 4:30       0         
11.19-5.21_15_min 11/17/2019 4:45       0         
11.19-5.21_15_min 11/17/2019 5:00       0         
11.19-5.21_15_min 11/17/2019 5:15       0         
11.19-5.21_15_min 11/17/2019 5:30       0         
11.19-5.21_15_min 11/17/2019 5:45       0         
11.19-5.21_15_min 11/17/2019 6:00       0         
11.19-5.21_15_min 11/17/2019 6:15       0         
11.19-5.21_15_min 11/17/2019 6:30       0         
11.19-5.21_15_min 11/17/2019 6:45       0         
11.19-5.21_15_min 11/17/2019 7:00       0         
11.19-5.21_15_min 11/17/2019 7:15       0         
11.19-5.21_15_min 11/17/2019 7:30       0         
11.19-5.21_15_min 11/17/2019 7:45       0         
11.19-5.21_15_min 11/17/2019 8:00       0         
11.19-5.21_15_min 11/17/2019 8:15       0         
11.19-5.21_15_min 11/17/2019 8:30       0         
11.19-5.21_15_min 11/17/2019 8:45       0         
11.19-5.21_15_min 11/17/2019 9:00       0         
11.19-5.21_15_min 11/17/2019 9:15       0         
11.19-5.21_15_min 11/17/2019 9:30       0         
11.19-5.21_15_min 11/17/2019 9:45       0         
11.19-5.21_15_min 11/17/2019 10:00      0         
11.19-5.21_15_min 11/17/2019 10:15      0         
11.19-5.21_15_min 11/17/2019 10:30      0         
11.19-5.21_15_min 11/17/2019 10:45      0         
11.19-5.21_15_min 11/17/2019 11:00      0         
11.19-5.21_15_min 11/17/2019 11:15      0         
11.19-5.21_15_min 11/17/2019 11:30      0         
11.19-5.21_15_min 11/17/2019 11:45      0         
11.19-5.21_15_min 11/17/2019 12:00      0         
11.19-5.21_15_min 11/17/2019 12:15      0         
11.19-5.21_15_min 11/17/2019 12:30      0         
11.19-5.21_15_min 11/17/2019 12:45      0         
11.19-5.21_15_min 11/17/2019 13:00      0         
11.19-5.21_15_min 11/17/2019 13:15      0         
11.19-5.21_15_min 11/17/2019 13:30      0         
11.19-5.21_15_min 11/17/2019 13:45      0         
11.19-5.21_15_min 11/17/2019 14:00      0         
11.19-5.21_15_min 11/17/2019 14:15      0         
11.19-5.21_15_min 11/17/2019 14:30      0         
11.19-5.21_15_min 11/17/2019 14:45      0         
11.19-5.21_15_min 11/17/2019 15:00      0         
11.19-5.21_15_min 11/17/2019 15:15      0         
11.19-5.21_15_min 11/17/2019 15:30      0         
11.19-5.21_15_min 11/17/2019 15:45      0         
11.19-5.21_15_min 11/17/2019 16:00      0         
11.19-5.21_15_min 11/17/2019 16:15      0         
11.19-5.21_15_min 11/17/2019 16:30      0         
11.19-5.21_15_min 11/17/2019 16:45      0         
11.19-5.21_15_min 11/17/2019 17:00      0         
11.19-5.21_15_min 11/17/2019 17:15      0         
11.19-5.21_15_min 11/17/2019 17:30      0         
11.19-5.21_15_min 11/17/2019 17:45      0         
11.19-5.21_15_min 11/17/2019 18:00      0         
11.19-5.21_15_min 11/17/2019 18:15      0         
11.19-5.21_15_min 11/17/2019 18:30      0         
11.19-5.21_15_min 11/17/2019 18:45      0         
11.19-5.21_15_min 11/17/2019 19:00      0         
11.19-5.21_15_min 11/17/2019 19:15      0         
11.19-5.21_15_min 11/17/2019 19:30      0         
11.19-5.21_15_min 11/17/2019 19:45      0         
11.19-5.21_15_min 11/17/2019 20:00      0         
11.19-5.21_15_min 11/17/2019 20:15      0         
11.19-5.21_15_min 11/17/2019 20:30      0         
11.19-5.21_15_min 11/17/2019 20:45      0         
11.19-5.21_15_min 11/17/2019 21:00      0         
11.19-5.21_15_min 11/17/2019 21:15      0         
11.19-5.21_15_min 11/17/2019 21:30      0         
11.19-5.21_15_min 11/17/2019 21:45      0         
11.19-5.21_15_min 11/17/2019 22:00      0         
11.19-5.21_15_min 11/17/2019 22:15      0         
11.19-5.21_15_min 11/17/2019 22:30      0         
11.19-5.21_15_min 11/17/2019 22:45      0         
11.19-5.21_15_min 11/17/2019 23:00      0         
11.19-5.21_15_min 11/17/2019 23:15      0         
11.19-5.21_15_min 11/17/2019 23:30      0         
11.19-5.21_15_min 11/17/2019 23:45      0         
11.19-5.21_15_min 11/18/2019 0:00       0         
11.19-5.21_15_min 11/18/2019 0:15       0         
11.19-5.21_15_min 11/18/2019 0:30       0         
11.19-5.21_15_min 11/18/2019 0:45       0         
11.19-5.21_15_min 11/18/2019 1:00       0         
11.19-5.21_15_min 11/18/2019 1:15       0         
11.19-5.21_15_min 11/18/2019 1:30       0         
11.19-5.21_15_min 11/18/2019 1:45       0         
11.19-5.21_15_min 11/18/2019 2:00       0         
11.19-5.21_15_min 11/18/2019 2:15       0         
11.19-5.21_15_min 11/18/2019 2:30       0         
11.19-5.21_15_min 11/18/2019 2:45       0         
11.19-5.21_15_min 11/18/2019 3:00       0         
11.19-5.21_15_min 11/18/2019 3:15       0         
11.19-5.21_15_min 11/18/2019 3:30       0         
11.19-5.21_15_min 11/18/2019 3:45       0         
11.19-5.21_15_min 11/18/2019 4:00       0         
11.19-5.21_15_min 11/18/2019 4:15       0         
11.19-5.21_15_min 11/18/2019 4:30       0         
11.19-5.21_15_min 11/18/2019 4:45       0         
11.19-5.21_15_min 11/18/2019 5:00       0         
11.19-5.21_15_min 11/18/2019 5:15       0         
11.19-5.21_15_min 11/18/2019 5:30       0         
11.19-5.21_15_min 11/18/2019 5:45       0         
11.19-5.21_15_min 11/18/2019 6:00       0         
11.19-5.21_15_min 11/18/2019 6:15       0         
11.19-5.21_15_min 11/18/2019 6:30       0         
11.19-5.21_15_min 11/18/2019 6:45       0         
11.19-5.21_15_min 11/18/2019 7:00       0         
11.19-5.21_15_min 11/18/2019 7:15       0         
11.19-5.21_15_min 11/18/2019 7:30       0         
11.19-5.21_15_min 11/18/2019 7:45       0         
11.19-5.21_15_min 11/18/2019 8:00       0         
11.19-5.21_15_min 11/18/2019 8:15       0         
11.19-5.21_15_min 11/18/2019 8:30       0.01      
11.19-5.21_15_min 11/18/2019 8:45       0.01      
11.19-5.21_15_min 11/18/2019 9:00       0         
11.19-5.21_15_min 11/18/2019 9:15       0         
11.19-5.21_15_min 11/18/2019 9:30       0.01      
11.19-5.21_15_min 11/18/2019 9:45       0         
11.19-5.21_15_min 11/18/2019 10:00      0         
11.19-5.21_15_min 11/18/2019 10:15      0.01      
11.19-5.21_15_min 11/18/2019 10:30      0         
11.19-5.21_15_min 11/18/2019 10:45      0         
11.19-5.21_15_min 11/18/2019 11:00      0         
11.19-5.21_15_min 11/18/2019 11:15      0         
11.19-5.21_15_min 11/18/2019 11:30      0         
11.19-5.21_15_min 11/18/2019 11:45      0         
11.19-5.21_15_min 11/18/2019 12:00      0         
11.19-5.21_15_min 11/18/2019 12:15      0         
11.19-5.21_15_min 11/18/2019 12:30      0         
11.19-5.21_15_min 11/18/2019 12:45      0         
11.19-5.21_15_min 11/18/2019 13:00      0         
11.19-5.21_15_min 11/18/2019 13:15      0         
11.19-5.21_15_min 11/18/2019 13:30      0         
11.19-5.21_15_min 11/18/2019 13:45      0         
11.19-5.21_15_min 11/18/2019 14:00      0         
11.19-5.21_15_min 11/18/2019 14:15      0         
11.19-5.21_15_min 11/18/2019 14:30      0         
11.19-5.21_15_min 11/18/2019 14:45      0         
11.19-5.21_15_min 11/18/2019 15:00      0         
11.19-5.21_15_min 11/18/2019 15:15      0         
11.19-5.21_15_min 11/18/2019 15:30      0         
11.19-5.21_15_min 11/18/2019 15:45      0         
11.19-5.21_15_min 11/18/2019 16:00      0         
11.19-5.21_15_min 11/18/2019 16:15      0         
11.19-5.21_15_min 11/18/2019 16:30      0         
11.19-5.21_15_min 11/18/2019 16:45      0         
11.19-5.21_15_min 11/18/2019 17:00      0         
11.19-5.21_15_min 11/18/2019 17:15      0         
11.19-5.21_15_min 11/18/2019 17:30      0         
11.19-5.21_15_min 11/18/2019 17:45      0         
11.19-5.21_15_min 11/18/2019 18:00      0         
11.19-5.21_15_min 11/18/2019 18:15      0         
11.19-5.21_15_min 11/18/2019 18:30      0         
11.19-5.21_15_min 11/18/2019 18:45      0         
11.19-5.21_15_min 11/18/2019 19:00      0         
11.19-5.21_15_min 11/18/2019 19:15      0         
11.19-5.21_15_min 11/18/2019 19:30      0         
11.19-5.21_15_min 11/18/2019 19:45      0         
11.19-5.21_15_min 11/18/2019 20:00      0         
11.19-5.21_15_min 11/18/2019 20:15      0         
11.19-5.21_15_min 11/18/2019 20:30      0         
11.19-5.21_15_min 11/18/2019 20:45      0         
11.19-5.21_15_min 11/18/2019 21:00      0         
11.19-5.21_15_min 11/18/2019 21:15      0         
11.19-5.21_15_min 11/18/2019 21:30      0         
11.19-5.21_15_min 11/18/2019 21:45      0         
11.19-5.21_15_min 11/18/2019 22:00      0         
11.19-5.21_15_min 11/18/2019 22:15      0         
11.19-5.21_15_min 11/18/2019 22:30      0         
11.19-5.21_15_min 11/18/2019 22:45      0         
11.19-5.21_15_min 11/18/2019 23:00      0         
11.19-5.21_15_min 11/18/2019 23:15      0         
11.19-5.21_15_min 11/18/2019 23:30      0         
11.19-5.21_15_min 11/18/2019 23:45      0         
11.19-5.21_15_min 11/19/2019 0:00       0         
11.19-5.21_15_min 11/19/2019 0:15       0         
11.19-5.21_15_min 11/19/2019 0:30       0         
11.19-5.21_15_min 11/19/2019 0:45       0         
11.19-5.21_15_min 11/19/2019 1:00       0         
11.19-5.21_15_min 11/19/2019 1:15       0         
11.19-5.21_15_min 11/19/2019 1:30       0         
11.19-5.21_15_min 11/19/2019 1:45       0         
11.19-5.21_15_min 11/19/2019 2:00       0         
11.19-5.21_15_min 11/19/2019 2:15       0         
11.19-5.21_15_min 11/19/2019 2:30       0         
11.19-5.21_15_min 11/19/2019 2:45       0         
11.19-5.21_15_min 11/19/2019 3:00       0         
11.19-5.21_15_min 11/19/2019 4:15       0         
11.19-5.21_15_min 11/19/2019 4:30       0.01      
11.19-5.21_15_min 11/19/2019 9:15       0.01      
11.19-5.21_15_min 11/19/2019 9:30       0         
11.19-5.21_15_min 11/19/2019 9:45       0         
11.19-5.21_15_min 11/19/2019 10:00      0         
11.19-5.21_15_min 11/19/2019 10:15      0         
11.19-5.21_15_min 11/19/2019 10:30      0.01      
11.19-5.21_15_min 11/19/2019 10:45      0         
11.19-5.21_15_min 11/19/2019 11:00      0         
11.19-5.21_15_min 11/19/2019 11:15      0         
11.19-5.21_15_min 11/19/2019 11:30      0         
11.19-5.21_15_min 11/19/2019 11:45      0         
11.19-5.21_15_min 11/19/2019 12:00      0         
11.19-5.21_15_min 11/19/2019 12:15      0         
11.19-5.21_15_min 11/19/2019 12:30      0         
11.19-5.21_15_min 11/19/2019 12:45      0         
11.19-5.21_15_min 11/19/2019 13:30      0         
11.19-5.21_15_min 11/19/2019 13:45      0         
11.19-5.21_15_min 11/19/2019 14:00      0         
11.19-5.21_15_min 11/19/2019 14:15      0         
11.19-5.21_15_min 11/19/2019 14:30      0         
11.19-5.21_15_min 11/19/2019 14:45      0         
11.19-5.21_15_min 11/19/2019 15:00      0         
11.19-5.21_15_min 11/19/2019 15:15      0         
11.19-5.21_15_min 11/19/2019 15:30      0         
11.19-5.21_15_min 11/19/2019 15:45      0         
11.19-5.21_15_min 11/19/2019 16:00      0         
11.19-5.21_15_min 11/19/2019 16:15      0         
11.19-5.21_15_min 11/19/2019 16:30      0         
11.19-5.21_15_min 11/19/2019 16:45      0         
11.19-5.21_15_min 11/19/2019 17:00      0         
11.19-5.21_15_min 11/19/2019 17:15      0         
11.19-5.21_15_min 11/19/2019 17:30      0         
11.19-5.21_15_min 11/19/2019 17:45      0         
11.19-5.21_15_min 11/19/2019 18:00      0         
11.19-5.21_15_min 11/19/2019 18:15      0         
11.19-5.21_15_min 11/19/2019 18:30      0         
11.19-5.21_15_min 11/19/2019 18:45      0         
11.19-5.21_15_min 11/19/2019 19:00      0         
11.19-5.21_15_min 11/19/2019 19:15      0         
11.19-5.21_15_min 11/19/2019 19:30      0         
11.19-5.21_15_min 11/19/2019 19:45      0         
11.19-5.21_15_min 11/19/2019 20:00      0         
11.19-5.21_15_min 11/19/2019 20:15      0         
11.19-5.21_15_min 11/19/2019 20:30      0         
11.19-5.21_15_min 11/19/2019 20:45      0         
11.19-5.21_15_min 11/19/2019 21:00      0         
11.19-5.21_15_min 11/19/2019 21:15      0         
11.19-5.21_15_min 11/19/2019 21:30      0         
11.19-5.21_15_min 11/19/2019 21:45      0         
11.19-5.21_15_min 11/19/2019 22:00      0         
11.19-5.21_15_min 11/19/2019 22:15      0         
11.19-5.21_15_min 11/19/2019 22:30      0         
11.19-5.21_15_min 11/19/2019 22:45      0         
11.19-5.21_15_min 11/19/2019 23:00      0         
11.19-5.21_15_min 11/19/2019 23:15      0         
11.19-5.21_15_min 11/19/2019 23:30      0         
11.19-5.21_15_min 11/19/2019 23:45      0         
11.19-5.21_15_min 11/20/2019 0:00       0         
11.19-5.21_15_min 11/20/2019 0:15       0         
11.19-5.21_15_min 11/20/2019 0:30       0         
11.19-5.21_15_min 11/20/2019 0:45       0         
11.19-5.21_15_min 11/20/2019 1:00       0         
11.19-5.21_15_min 11/20/2019 1:15       0         
11.19-5.21_15_min 11/20/2019 1:30       0         
11.19-5.21_15_min 11/20/2019 1:45       0         
11.19-5.21_15_min 11/20/2019 2:00       0         
11.19-5.21_15_min 11/20/2019 2:15       0         
11.19-5.21_15_min 11/20/2019 2:30       0         
11.19-5.21_15_min 11/20/2019 2:45       0         
11.19-5.21_15_min 11/20/2019 3:00       0         
11.19-5.21_15_min 11/20/2019 3:15       0         
11.19-5.21_15_min 11/20/2019 3:30       0         
11.19-5.21_15_min 11/20/2019 3:45       0         
11.19-5.21_15_min 11/20/2019 4:00       0         
11.19-5.21_15_min 11/20/2019 4:15       0         
11.19-5.21_15_min 11/20/2019 4:30       0         
11.19-5.21_15_min 11/20/2019 4:45       0         
11.19-5.21_15_min 11/20/2019 5:00       0         
11.19-5.21_15_min 11/20/2019 5:15       0         
11.19-5.21_15_min 11/20/2019 5:30       0         
11.19-5.21_15_min 11/20/2019 5:45       0         
11.19-5.21_15_min 11/20/2019 6:00       0         
11.19-5.21_15_min 11/20/2019 6:15       0         
11.19-5.21_15_min 11/20/2019 6:30       0         
11.19-5.21_15_min 11/20/2019 6:45       0         
11.19-5.21_15_min 11/20/2019 7:00       0         
11.19-5.21_15_min 11/20/2019 7:15       0         
11.19-5.21_15_min 11/20/2019 7:30       0         
11.19-5.21_15_min 11/20/2019 7:45       0         
11.19-5.21_15_min 11/20/2019 8:00       0         
11.19-5.21_15_min 11/20/2019 8:15       0         
11.19-5.21_15_min 11/20/2019 8:30       0         
11.19-5.21_15_min 11/20/2019 8:45       0         
11.19-5.21_15_min 11/20/2019 9:00       0         
11.19-5.21_15_min 11/20/2019 9:15       0         
11.19-5.21_15_min 11/20/2019 9:30       0         
11.19-5.21_15_min 11/20/2019 9:45       0         
11.19-5.21_15_min 11/20/2019 10:00      0         
11.19-5.21_15_min 11/20/2019 10:15      0         
11.19-5.21_15_min 11/20/2019 10:30      0         
11.19-5.21_15_min 11/20/2019 10:45      0         
11.19-5.21_15_min 11/20/2019 11:00      0         
11.19-5.21_15_min 11/20/2019 11:15      0         
11.19-5.21_15_min 11/20/2019 11:30      0.01      
11.19-5.21_15_min 11/20/2019 11:45      0         
11.19-5.21_15_min 11/20/2019 12:00      0         
11.19-5.21_15_min 11/20/2019 12:15      0         
11.19-5.21_15_min 11/20/2019 12:30      0         
11.19-5.21_15_min 11/20/2019 12:45      0         
11.19-5.21_15_min 11/20/2019 13:00      0         
11.19-5.21_15_min 11/20/2019 13:15      0         
11.19-5.21_15_min 11/20/2019 13:30      0         
11.19-5.21_15_min 11/20/2019 13:45      0         
11.19-5.21_15_min 11/20/2019 14:00      0         
11.19-5.21_15_min 11/20/2019 14:15      0         
11.19-5.21_15_min 11/20/2019 14:30      0         
11.19-5.21_15_min 11/20/2019 14:45      0         
11.19-5.21_15_min 11/20/2019 15:00      0         
11.19-5.21_15_min 11/20/2019 15:15      0         
11.19-5.21_15_min 11/20/2019 15:30      0         
11.19-5.21_15_min 11/20/2019 15:45      0         
11.19-5.21_15_min 11/20/2019 16:00      0         
11.19-5.21_15_min 11/20/2019 16:15      0         
11.19-5.21_15_min 11/20/2019 16:30      0         
11.19-5.21_15_min 11/20/2019 16:45      0         
11.19-5.21_15_min 11/20/2019 17:00      0         
11.19-5.21_15_min 11/20/2019 17:15      0         
11.19-5.21_15_min 11/20/2019 17:30      0         
11.19-5.21_15_min 11/20/2019 17:45      0         
11.19-5.21_15_min 11/20/2019 18:00      0         
11.19-5.21_15_min 11/20/2019 18:15      0         
11.19-5.21_15_min 11/20/2019 18:30      0         
11.19-5.21_15_min 11/20/2019 18:45      0         
11.19-5.21_15_min 11/20/2019 19:00      0         
11.19-5.21_15_min 11/20/2019 19:15      0         
11.19-5.21_15_min 11/20/2019 19:30      0         
11.19-5.21_15_min 11/20/2019 19:45      0         
11.19-5.21_15_min 11/20/2019 20:00      0         
11.19-5.21_15_min 11/20/2019 20:15      0         
11.19-5.21_15_min 11/20/2019 20:30      0         
11.19-5.21_15_min 11/20/2019 20:45      0         
11.19-5.21_15_min 11/20/2019 21:00      0         
11.19-5.21_15_min 11/20/2019 21:15      0         
11.19-5.21_15_min 11/20/2019 21:30      0         
11.19-5.21_15_min 11/20/2019 21:45      0         
11.19-5.21_15_min 11/20/2019 22:00      0         
11.19-5.21_15_min 11/20/2019 22:15      0         
11.19-5.21_15_min 11/20/2019 22:30      0         
11.19-5.21_15_min 11/20/2019 22:45      0         
11.19-5.21_15_min 11/20/2019 23:00      0         
11.19-5.21_15_min 11/20/2019 23:15      0         
11.19-5.21_15_min 11/20/2019 23:30      0         
11.19-5.21_15_min 11/20/2019 23:45      0         
11.19-5.21_15_min 11/21/2019 0:00       0         
11.19-5.21_15_min 11/21/2019 0:15       0         
11.19-5.21_15_min 11/21/2019 0:30       0         
11.19-5.21_15_min 11/21/2019 0:45       0         
11.19-5.21_15_min 11/21/2019 1:00       0         
11.19-5.21_15_min 11/21/2019 1:15       0         
11.19-5.21_15_min 11/21/2019 1:30       0         
11.19-5.21_15_min 11/21/2019 1:45       0         
11.19-5.21_15_min 11/21/2019 2:00       0         
11.19-5.21_15_min 11/21/2019 2:15       0         
11.19-5.21_15_min 11/21/2019 2:30       0         
11.19-5.21_15_min 11/21/2019 2:45       0         
11.19-5.21_15_min 11/21/2019 3:00       0         
11.19-5.21_15_min 11/21/2019 3:15       0         
11.19-5.21_15_min 11/21/2019 3:30       0         
11.19-5.21_15_min 11/21/2019 3:45       0         
11.19-5.21_15_min 11/21/2019 4:00       0         
11.19-5.21_15_min 11/21/2019 4:15       0         
11.19-5.21_15_min 11/21/2019 4:30       0         
11.19-5.21_15_min 11/21/2019 4:45       0         
11.19-5.21_15_min 11/21/2019 5:00       0         
11.19-5.21_15_min 11/21/2019 5:15       0         
11.19-5.21_15_min 11/21/2019 5:30       0         
11.19-5.21_15_min 11/21/2019 5:45       0         
11.19-5.21_15_min 11/21/2019 6:00       0         
11.19-5.21_15_min 11/21/2019 6:15       0         
11.19-5.21_15_min 11/21/2019 6:30       0         
11.19-5.21_15_min 11/21/2019 6:45       0         
11.19-5.21_15_min 11/21/2019 7:00       0         
11.19-5.21_15_min 11/21/2019 7:15       0         
11.19-5.21_15_min 11/21/2019 7:30       0         
11.19-5.21_15_min 11/21/2019 7:45       0         
11.19-5.21_15_min 11/21/2019 8:00       0         
11.19-5.21_15_min 11/21/2019 8:15       0         
11.19-5.21_15_min 11/21/2019 8:30       0         
11.19-5.21_15_min 11/21/2019 8:45       0         
11.19-5.21_15_min 11/21/2019 9:00       0         
11.19-5.21_15_min 11/21/2019 9:15       0         
11.19-5.21_15_min 11/21/2019 9:30       0         
11.19-5.21_15_min 11/21/2019 9:45       0         
11.19-5.21_15_min 11/21/2019 10:00      0         
11.19-5.21_15_min 11/21/2019 10:15      0         
11.19-5.21_15_min 11/21/2019 10:30      0         
11.19-5.21_15_min 11/21/2019 10:45      0         
11.19-5.21_15_min 11/21/2019 11:00      0         
11.19-5.21_15_min 11/21/2019 11:15      0         
11.19-5.21_15_min 11/21/2019 11:30      0         
11.19-5.21_15_min 11/21/2019 11:45      0         
11.19-5.21_15_min 11/21/2019 12:00      0         
11.19-5.21_15_min 11/21/2019 12:15      0         
11.19-5.21_15_min 11/21/2019 12:30      0         
11.19-5.21_15_min 11/21/2019 12:45      0         
11.19-5.21_15_min 11/21/2019 13:00      0         
11.19-5.21_15_min 11/21/2019 13:15      0         
11.19-5.21_15_min 11/21/2019 13:30      0         
11.19-5.21_15_min 11/21/2019 13:45      0         
11.19-5.21_15_min 11/21/2019 14:00      0         
11.19-5.21_15_min 11/21/2019 14:15      0         
11.19-5.21_15_min 11/21/2019 14:30      0         
11.19-5.21_15_min 11/21/2019 14:45      0         
11.19-5.21_15_min 11/21/2019 15:00      0         
11.19-5.21_15_min 11/21/2019 15:15      0         
11.19-5.21_15_min 11/21/2019 15:30      0         
11.19-5.21_15_min 11/21/2019 15:45      0         
11.19-5.21_15_min 11/21/2019 16:00      0         
11.19-5.21_15_min 11/21/2019 16:15      0         
11.19-5.21_15_min 11/21/2019 16:30      0         
11.19-5.21_15_min 11/21/2019 16:45      0         
11.19-5.21_15_min 11/21/2019 17:00      0         
11.19-5.21_15_min 11/21/2019 17:15      0         
11.19-5.21_15_min 11/21/2019 17:30      0         
11.19-5.21_15_min 11/21/2019 17:45      0         
11.19-5.21_15_min 11/21/2019 18:00      0         
11.19-5.21_15_min 11/21/2019 18:15      0         
11.19-5.21_15_min 11/21/2019 18:30      0         
11.19-5.21_15_min 11/21/2019 18:45      0         
11.19-5.21_15_min 11/21/2019 19:00      0         
11.19-5.21_15_min 11/21/2019 19:15      0         
11.19-5.21_15_min 11/21/2019 19:30      0         
11.19-5.21_15_min 11/21/2019 19:45      0         
11.19-5.21_15_min 11/21/2019 20:00      0         
11.19-5.21_15_min 11/21/2019 20:15      0         
11.19-5.21_15_min 11/21/2019 20:30      0         
11.19-5.21_15_min 11/21/2019 20:45      0         
11.19-5.21_15_min 11/21/2019 21:00      0         
11.19-5.21_15_min 11/21/2019 21:15      0         
11.19-5.21_15_min 11/21/2019 21:30      0         
11.19-5.21_15_min 11/21/2019 21:45      0         
11.19-5.21_15_min 11/21/2019 22:00      0         
11.19-5.21_15_min 11/21/2019 22:15      0         
11.19-5.21_15_min 11/21/2019 22:30      0         
11.19-5.21_15_min 11/21/2019 22:45      0         
11.19-5.21_15_min 11/21/2019 23:00      0         
11.19-5.21_15_min 11/21/2019 23:15      0         
11.19-5.21_15_min 11/21/2019 23:30      0         
11.19-5.21_15_min 11/21/2019 23:45      0         
11.19-5.21_15_min 11/22/2019 0:00       0         
11.19-5.21_15_min 11/22/2019 0:15       0         
11.19-5.21_15_min 11/22/2019 0:30       0         
11.19-5.21_15_min 11/22/2019 0:45       0         
11.19-5.21_15_min 11/22/2019 1:00       0         
11.19-5.21_15_min 11/22/2019 1:15       0         
11.19-5.21_15_min 11/22/2019 1:30       0         
11.19-5.21_15_min 11/22/2019 1:45       0         
11.19-5.21_15_min 11/22/2019 2:00       0         
11.19-5.21_15_min 11/22/2019 2:15       0         
11.19-5.21_15_min 11/22/2019 2:30       0         
11.19-5.21_15_min 11/22/2019 2:45       0         
11.19-5.21_15_min 11/22/2019 3:00       0         
11.19-5.21_15_min 11/22/2019 3:15       0         
11.19-5.21_15_min 11/22/2019 3:30       0         
11.19-5.21_15_min 11/22/2019 3:45       0         
11.19-5.21_15_min 11/22/2019 4:00       0         
11.19-5.21_15_min 11/22/2019 4:15       0         
11.19-5.21_15_min 11/22/2019 4:30       0         
11.19-5.21_15_min 11/22/2019 4:45       0         
11.19-5.21_15_min 11/22/2019 5:00       0         
11.19-5.21_15_min 11/22/2019 5:15       0         
11.19-5.21_15_min 11/22/2019 5:30       0         
11.19-5.21_15_min 11/22/2019 5:45       0         
11.19-5.21_15_min 11/22/2019 6:00       0         
11.19-5.21_15_min 11/22/2019 6:15       0         
11.19-5.21_15_min 11/22/2019 6:30       0         
11.19-5.21_15_min 11/22/2019 6:45       0         
11.19-5.21_15_min 11/22/2019 7:00       0         
11.19-5.21_15_min 11/22/2019 7:15       0         
11.19-5.21_15_min 11/22/2019 7:30       0         
11.19-5.21_15_min 11/22/2019 7:45       0         
11.19-5.21_15_min 11/22/2019 8:00       0         
11.19-5.21_15_min 11/22/2019 8:15       0         
11.19-5.21_15_min 11/22/2019 8:30       0         
11.19-5.21_15_min 11/22/2019 8:45       0         
11.19-5.21_15_min 11/22/2019 9:00       0         
11.19-5.21_15_min 11/22/2019 9:15       0         
11.19-5.21_15_min 11/22/2019 9:30       0         
11.19-5.21_15_min 11/22/2019 9:45       0         
11.19-5.21_15_min 11/22/2019 10:00      0         
11.19-5.21_15_min 11/22/2019 10:15      0         
11.19-5.21_15_min 11/22/2019 10:30      0         
11.19-5.21_15_min 11/22/2019 10:45      0         
11.19-5.21_15_min 11/22/2019 11:00      0         
11.19-5.21_15_min 11/22/2019 11:15      0         
11.19-5.21_15_min 11/22/2019 11:30      0         
11.19-5.21_15_min 11/22/2019 11:45      0         
11.19-5.21_15_min 11/22/2019 12:00      0         
11.19-5.21_15_min 11/22/2019 12:15      0         
11.19-5.21_15_min 11/22/2019 12:30      0         
11.19-5.21_15_min 11/22/2019 12:45      0         
11.19-5.21_15_min 11/22/2019 13:00      0         
11.19-5.21_15_min 11/22/2019 13:15      0         
11.19-5.21_15_min 11/22/2019 13:30      0.01      
11.19-5.21_15_min 11/22/2019 13:45      0.03      
11.19-5.21_15_min 11/22/2019 14:00      0.02      
11.19-5.21_15_min 11/22/2019 14:15      0.05      
11.19-5.21_15_min 11/22/2019 14:30      0.02      
11.19-5.21_15_min 11/22/2019 14:45      0         
11.19-5.21_15_min 11/22/2019 15:00      0.01      
11.19-5.21_15_min 11/22/2019 15:15      0         
11.19-5.21_15_min 11/22/2019 15:30      0         
11.19-5.21_15_min 11/22/2019 15:45      0         
11.19-5.21_15_min 11/22/2019 16:00      0         
11.19-5.21_15_min 11/22/2019 16:15      0         
11.19-5.21_15_min 11/22/2019 16:30      0         
11.19-5.21_15_min 11/22/2019 16:45      0         
11.19-5.21_15_min 11/22/2019 17:00      0         
11.19-5.21_15_min 11/22/2019 17:15      0         
11.19-5.21_15_min 11/22/2019 17:30      0         
11.19-5.21_15_min 11/22/2019 17:45      0         
11.19-5.21_15_min 11/22/2019 18:00      0         
11.19-5.21_15_min 11/22/2019 18:15      0         
11.19-5.21_15_min 11/22/2019 18:30      0         
11.19-5.21_15_min 11/22/2019 18:45      0         
11.19-5.21_15_min 11/22/2019 19:00      0         
11.19-5.21_15_min 11/22/2019 19:15      0         
11.19-5.21_15_min 11/22/2019 19:30      0         
11.19-5.21_15_min 11/22/2019 19:45      0         
11.19-5.21_15_min 11/22/2019 20:00      0         
11.19-5.21_15_min 11/22/2019 20:15      0         
11.19-5.21_15_min 11/22/2019 20:30      0         
11.19-5.21_15_min 11/22/2019 20:45      0         
11.19-5.21_15_min 11/22/2019 21:00      0         
11.19-5.21_15_min 11/22/2019 21:15      0         
11.19-5.21_15_min 11/22/2019 21:30      0         
11.19-5.21_15_min 11/22/2019 21:45      0         
11.19-5.21_15_min 11/22/2019 22:00      0         
11.19-5.21_15_min 11/22/2019 22:15      0         
11.19-5.21_15_min 11/22/2019 22:30      0         
11.19-5.21_15_min 11/22/2019 22:45      0         
11.19-5.21_15_min 11/22/2019 23:00      0         
11.19-5.21_15_min 11/22/2019 23:15      0         
11.19-5.21_15_min 11/22/2019 23:30      0         
11.19-5.21_15_min 11/22/2019 23:45      0         
11.19-5.21_15_min 11/23/2019 0:00       0         
11.19-5.21_15_min 11/23/2019 0:15       0         
11.19-5.21_15_min 11/23/2019 0:30       0         
11.19-5.21_15_min 11/23/2019 0:45       0         
11.19-5.21_15_min 11/23/2019 1:00       0         
11.19-5.21_15_min 11/23/2019 1:15       0         
11.19-5.21_15_min 11/23/2019 1:30       0         
11.19-5.21_15_min 11/23/2019 1:45       0         
11.19-5.21_15_min 11/23/2019 2:00       0         
11.19-5.21_15_min 11/23/2019 2:15       0         
11.19-5.21_15_min 11/23/2019 2:30       0         
11.19-5.21_15_min 11/23/2019 2:45       0         
11.19-5.21_15_min 11/23/2019 3:00       0         
11.19-5.21_15_min 11/23/2019 3:15       0         
11.19-5.21_15_min 11/23/2019 3:30       0         
11.19-5.21_15_min 11/23/2019 3:45       0         
11.19-5.21_15_min 11/23/2019 4:00       0         
11.19-5.21_15_min 11/23/2019 4:15       0         
11.19-5.21_15_min 11/23/2019 4:30       0         
11.19-5.21_15_min 11/23/2019 4:45       0         
11.19-5.21_15_min 11/23/2019 5:00       0         
11.19-5.21_15_min 11/23/2019 5:15       0         
11.19-5.21_15_min 11/23/2019 5:30       0         
11.19-5.21_15_min 11/23/2019 5:45       0         
11.19-5.21_15_min 11/23/2019 6:00       0         
11.19-5.21_15_min 11/23/2019 6:15       0         
11.19-5.21_15_min 11/23/2019 6:30       0         
11.19-5.21_15_min 11/23/2019 6:45       0         
11.19-5.21_15_min 11/23/2019 7:00       0         
11.19-5.21_15_min 11/23/2019 7:15       0         
11.19-5.21_15_min 11/23/2019 7:30       0         
11.19-5.21_15_min 11/23/2019 7:45       0         
11.19-5.21_15_min 11/23/2019 8:00       0         
11.19-5.21_15_min 11/23/2019 8:15       0         
11.19-5.21_15_min 11/23/2019 8:30       0         
11.19-5.21_15_min 11/23/2019 8:45       0         
11.19-5.21_15_min 11/23/2019 9:00       0         
11.19-5.21_15_min 11/23/2019 9:15       0         
11.19-5.21_15_min 11/23/2019 9:30       0         
11.19-5.21_15_min 11/23/2019 9:45       0         
11.19-5.21_15_min 11/23/2019 10:00      0         
11.19-5.21_15_min 11/23/2019 10:15      0         
11.19-5.21_15_min 11/23/2019 10:30      0         
11.19-5.21_15_min 11/23/2019 10:45      0         
11.19-5.21_15_min 11/23/2019 11:00      0         
11.19-5.21_15_min 11/23/2019 11:15      0         
11.19-5.21_15_min 11/23/2019 11:30      0         
11.19-5.21_15_min 11/23/2019 11:45      0         
11.19-5.21_15_min 11/23/2019 12:00      0         
11.19-5.21_15_min 11/23/2019 12:15      0         
11.19-5.21_15_min 11/23/2019 12:30      0         
11.19-5.21_15_min 11/23/2019 12:45      0         
11.19-5.21_15_min 11/23/2019 13:00      0         
11.19-5.21_15_min 11/23/2019 13:15      0         
11.19-5.21_15_min 11/23/2019 13:30      0         
11.19-5.21_15_min 11/23/2019 13:45      0         
11.19-5.21_15_min 11/23/2019 14:00      0         
11.19-5.21_15_min 11/23/2019 14:15      0         
11.19-5.21_15_min 11/23/2019 14:30      0         
11.19-5.21_15_min 11/23/2019 14:45      0         
11.19-5.21_15_min 11/23/2019 15:00      0         
11.19-5.21_15_min 11/23/2019 15:15      0         
11.19-5.21_15_min 11/23/2019 15:30      0         
11.19-5.21_15_min 11/23/2019 15:45      0         
11.19-5.21_15_min 11/23/2019 16:00      0         
11.19-5.21_15_min 11/23/2019 16:15      0         
11.19-5.21_15_min 11/23/2019 16:30      0         
11.19-5.21_15_min 11/23/2019 16:45      0         
11.19-5.21_15_min 11/23/2019 17:00      0         
11.19-5.21_15_min 11/23/2019 17:15      0         
11.19-5.21_15_min 11/23/2019 17:30      0         
11.19-5.21_15_min 11/23/2019 17:45      0         
11.19-5.21_15_min 11/23/2019 18:00      0         
11.19-5.21_15_min 11/23/2019 18:15      0         
11.19-5.21_15_min 11/23/2019 18:30      0         
11.19-5.21_15_min 11/23/2019 18:45      0         
11.19-5.21_15_min 11/23/2019 19:00      0         
11.19-5.21_15_min 11/23/2019 19:15      0         
11.19-5.21_15_min 11/23/2019 19:30      0         
11.19-5.21_15_min 11/23/2019 19:45      0         
11.19-5.21_15_min 11/23/2019 20:00      0         
11.19-5.21_15_min 11/23/2019 20:15      0         
11.19-5.21_15_min 11/23/2019 20:30      0         
11.19-5.21_15_min 11/23/2019 20:45      0         
11.19-5.21_15_min 11/23/2019 21:00      0         
11.19-5.21_15_min 11/23/2019 21:15      0         
11.19-5.21_15_min 11/23/2019 21:30      0         
11.19-5.21_15_min 11/23/2019 21:45      0         
11.19-5.21_15_min 11/23/2019 22:00      0         
11.19-5.21_15_min 11/23/2019 22:15      0         
11.19-5.21_15_min 11/23/2019 22:30      0         
11.19-5.21_15_min 11/23/2019 22:45      0         
11.19-5.21_15_min 11/23/2019 23:00      0         
11.19-5.21_15_min 11/23/2019 23:15      0         
11.19-5.21_15_min 11/23/2019 23:30      0         
11.19-5.21_15_min 11/23/2019 23:45      0         
11.19-5.21_15_min 11/24/2019 0:00       0         
11.19-5.21_15_min 11/24/2019 0:15       0         
11.19-5.21_15_min 11/24/2019 0:30       0         
11.19-5.21_15_min 11/24/2019 0:45       0         
11.19-5.21_15_min 11/24/2019 1:00       0         
11.19-5.21_15_min 11/24/2019 1:15       0         
11.19-5.21_15_min 11/24/2019 1:30       0.01      
11.19-5.21_15_min 11/24/2019 1:45       0.01      
11.19-5.21_15_min 11/24/2019 2:00       0.02      
11.19-5.21_15_min 11/24/2019 2:15       0.02      
11.19-5.21_15_min 11/24/2019 2:30       0.01      
11.19-5.21_15_min 11/24/2019 2:45       0.02      
11.19-5.21_15_min 11/24/2019 3:00       0.03      
11.19-5.21_15_min 11/24/2019 3:15       0.02      
11.19-5.21_15_min 11/24/2019 3:30       0.03      
11.19-5.21_15_min 11/24/2019 3:45       0         
11.19-5.21_15_min 11/24/2019 4:00       0         
11.19-5.21_15_min 11/24/2019 4:15       0.01      
11.19-5.21_15_min 11/24/2019 4:30       0         
11.19-5.21_15_min 11/24/2019 4:45       0.03      
11.19-5.21_15_min 11/24/2019 5:00       0         
11.19-5.21_15_min 11/24/2019 5:15       0.02      
11.19-5.21_15_min 11/24/2019 5:30       0.01      
11.19-5.21_15_min 11/24/2019 5:45       0         
11.19-5.21_15_min 11/24/2019 6:15       0         
11.19-5.21_15_min 11/24/2019 6:30       0.01      
11.19-5.21_15_min 11/24/2019 6:45       0.01      
11.19-5.21_15_min 11/24/2019 7:00       0.01      
11.19-5.21_15_min 11/24/2019 7:15       0         
11.19-5.21_15_min 11/24/2019 7:30       0.01      
11.19-5.21_15_min 11/24/2019 7:45       0.01      
11.19-5.21_15_min 11/24/2019 8:00       0         
11.19-5.21_15_min 11/24/2019 8:15       0.01      
11.19-5.21_15_min 11/24/2019 8:30       0.02      
11.19-5.21_15_min 11/24/2019 8:45       0.01      
11.19-5.21_15_min 11/24/2019 9:00       0.01      
11.19-5.21_15_min 11/24/2019 9:15       0.02      
11.19-5.21_15_min 11/24/2019 9:30       0.07      
11.19-5.21_15_min 11/24/2019 9:45       0.08      
11.19-5.21_15_min 11/24/2019 10:00      0.03      
11.19-5.21_15_min 11/24/2019 10:15      0.06      
11.19-5.21_15_min 11/24/2019 10:30      0.09      
11.19-5.21_15_min 11/24/2019 10:45      0.05      
11.19-5.21_15_min 11/24/2019 11:00      0.03      
11.19-5.21_15_min 11/24/2019 11:15      0.03      
11.19-5.21_15_min 11/24/2019 11:30      0.02      
11.19-5.21_15_min 11/24/2019 11:45      0.06      
11.19-5.21_15_min 11/24/2019 12:00      0.09      
11.19-5.21_15_min 11/24/2019 12:15      0.06      
11.19-5.21_15_min 11/24/2019 12:30      0.06      
11.19-5.21_15_min 11/24/2019 12:45      0.11      
11.19-5.21_15_min 11/24/2019 13:00      0.1       
11.19-5.21_15_min 11/24/2019 13:15      0.09      
11.19-5.21_15_min 11/24/2019 13:30      0.03      
11.19-5.21_15_min 11/24/2019 13:45      0.02      
11.19-5.21_15_min 11/24/2019 14:00      0.08      
11.19-5.21_15_min 11/24/2019 14:15      0         
11.19-5.21_15_min 11/24/2019 14:30      0.01      
11.19-5.21_15_min 11/24/2019 14:45      0.03      
11.19-5.21_15_min 11/24/2019 15:00      0.02      
11.19-5.21_15_min 11/24/2019 15:15      0.06      
11.19-5.21_15_min 11/24/2019 15:30      0.05      
11.19-5.21_15_min 11/24/2019 15:45      0.06      
11.19-5.21_15_min 11/24/2019 16:00      0.01      
11.19-5.21_15_min 11/24/2019 16:15      0.01      
11.19-5.21_15_min 11/24/2019 16:30      0.04      
11.19-5.21_15_min 11/24/2019 16:45      0.05      
11.19-5.21_15_min 11/24/2019 17:00      0.05      
11.19-5.21_15_min 11/24/2019 17:15      0.06      
11.19-5.21_15_min 11/24/2019 17:30      0.02      
11.19-5.21_15_min 11/24/2019 17:45      0.01      
11.19-5.21_15_min 11/24/2019 18:00      0         
11.19-5.21_15_min 11/24/2019 18:15      0         
11.19-5.21_15_min 11/24/2019 18:30      0         
11.19-5.21_15_min 11/24/2019 18:45      0         
11.19-5.21_15_min 11/24/2019 19:00      0         
11.19-5.21_15_min 11/24/2019 19:15      0         
11.19-5.21_15_min 11/24/2019 19:30      0         
11.19-5.21_15_min 11/24/2019 19:45      0         
11.19-5.21_15_min 11/24/2019 20:00      0         
11.19-5.21_15_min 11/24/2019 20:15      0         
11.19-5.21_15_min 11/24/2019 20:30      0         
11.19-5.21_15_min 11/24/2019 20:45      0         
11.19-5.21_15_min 11/24/2019 21:00      0         
11.19-5.21_15_min 11/24/2019 21:15      0         
11.19-5.21_15_min 11/24/2019 21:30      0         
11.19-5.21_15_min 11/24/2019 21:45      0         
11.19-5.21_15_min 11/24/2019 22:00      0         
11.19-5.21_15_min 11/24/2019 22:15      0         
11.19-5.21_15_min 11/24/2019 22:30      0         
11.19-5.21_15_min 11/24/2019 22:45      0         
11.19-5.21_15_min 11/24/2019 23:00      0         
11.19-5.21_15_min 11/24/2019 23:15      0         
11.19-5.21_15_min 11/24/2019 23:30      0         
11.19-5.21_15_min 11/24/2019 23:45      0         
11.19-5.21_15_min 11/25/2019 0:00       0         
11.19-5.21_15_min 11/25/2019 0:15       0         
11.19-5.21_15_min 11/25/2019 0:30       0         
11.19-5.21_15_min 11/25/2019 0:45       0         
11.19-5.21_15_min 11/25/2019 1:00       0         
11.19-5.21_15_min 11/25/2019 1:15       0         
11.19-5.21_15_min 11/25/2019 1:30       0         
11.19-5.21_15_min 11/25/2019 1:45       0         
11.19-5.21_15_min 11/25/2019 2:00       0         
11.19-5.21_15_min 11/25/2019 2:15       0         
11.19-5.21_15_min 11/25/2019 2:30       0         
11.19-5.21_15_min 11/25/2019 2:45       0         
11.19-5.21_15_min 11/25/2019 3:00       0         
11.19-5.21_15_min 11/25/2019 3:15       0         
11.19-5.21_15_min 11/25/2019 3:30       0         
11.19-5.21_15_min 11/25/2019 3:45       0         
11.19-5.21_15_min 11/25/2019 4:00       0         
11.19-5.21_15_min 11/25/2019 4:15       0         
11.19-5.21_15_min 11/25/2019 4:30       0         
11.19-5.21_15_min 11/25/2019 4:45       0         
11.19-5.21_15_min 11/25/2019 5:00       0         
11.19-5.21_15_min 11/25/2019 5:15       0         
11.19-5.21_15_min 11/25/2019 5:30       0         
11.19-5.21_15_min 11/25/2019 5:45       0         
11.19-5.21_15_min 11/25/2019 6:00       0         
11.19-5.21_15_min 11/25/2019 6:15       0         
11.19-5.21_15_min 11/25/2019 6:30       0         
11.19-5.21_15_min 11/25/2019 6:45       0         
11.19-5.21_15_min 11/25/2019 7:00       0         
11.19-5.21_15_min 11/25/2019 7:15       0         
11.19-5.21_15_min 11/25/2019 7:30       0         
11.19-5.21_15_min 11/25/2019 7:45       0         
11.19-5.21_15_min 11/25/2019 8:00       0         
11.19-5.21_15_min 11/25/2019 8:15       0         
11.19-5.21_15_min 11/25/2019 8:30       0         
11.19-5.21_15_min 11/25/2019 8:45       0         
11.19-5.21_15_min 11/25/2019 9:00       0         
11.19-5.21_15_min 11/25/2019 9:15       0         
11.19-5.21_15_min 11/25/2019 9:30       0         
11.19-5.21_15_min 11/25/2019 9:45       0         
11.19-5.21_15_min 11/25/2019 10:00      0         
11.19-5.21_15_min 11/25/2019 10:15      0         
11.19-5.21_15_min 11/25/2019 10:30      0         
11.19-5.21_15_min 11/25/2019 10:45      0         
11.19-5.21_15_min 11/25/2019 11:00      0         
11.19-5.21_15_min 11/25/2019 11:15      0         
11.19-5.21_15_min 11/25/2019 11:30      0         
11.19-5.21_15_min 11/25/2019 11:45      0         
11.19-5.21_15_min 11/25/2019 12:00      0         
11.19-5.21_15_min 11/25/2019 12:15      0         
11.19-5.21_15_min 11/25/2019 12:30      0         
11.19-5.21_15_min 11/25/2019 12:45      0         
11.19-5.21_15_min 11/25/2019 13:00      0         
11.19-5.21_15_min 11/25/2019 13:15      0         
11.19-5.21_15_min 11/25/2019 13:30      0         
11.19-5.21_15_min 11/25/2019 13:45      0         
11.19-5.21_15_min 11/25/2019 14:00      0         
11.19-5.21_15_min 11/25/2019 14:15      0         
11.19-5.21_15_min 11/25/2019 14:30      0         
11.19-5.21_15_min 11/25/2019 14:45      0         
11.19-5.21_15_min 11/25/2019 15:00      0         
11.19-5.21_15_min 11/25/2019 15:15      0         
11.19-5.21_15_min 11/25/2019 15:30      0         
11.19-5.21_15_min 11/25/2019 15:45      0         
11.19-5.21_15_min 11/25/2019 16:00      0         
11.19-5.21_15_min 11/25/2019 16:15      0         
11.19-5.21_15_min 11/25/2019 16:30      0         
11.19-5.21_15_min 11/25/2019 16:45      0         
11.19-5.21_15_min 11/25/2019 17:00      0         
11.19-5.21_15_min 11/25/2019 17:15      0         
11.19-5.21_15_min 11/25/2019 17:30      0         
11.19-5.21_15_min 11/25/2019 17:45      0         
11.19-5.21_15_min 11/25/2019 18:00      0         
11.19-5.21_15_min 11/25/2019 18:15      0         
11.19-5.21_15_min 11/25/2019 18:30      0         
11.19-5.21_15_min 11/25/2019 18:45      0         
11.19-5.21_15_min 11/25/2019 19:00      0         
11.19-5.21_15_min 11/25/2019 19:15      0         
11.19-5.21_15_min 11/25/2019 19:30      0         
11.19-5.21_15_min 11/25/2019 19:45      0         
11.19-5.21_15_min 11/25/2019 20:00      0         
11.19-5.21_15_min 11/25/2019 20:15      0         
11.19-5.21_15_min 11/25/2019 20:30      0         
11.19-5.21_15_min 11/25/2019 20:45      0         
11.19-5.21_15_min 11/25/2019 21:00      0         
11.19-5.21_15_min 11/25/2019 21:15      0         
11.19-5.21_15_min 11/25/2019 21:30      0         
11.19-5.21_15_min 11/25/2019 21:45      0         
11.19-5.21_15_min 11/25/2019 22:00      0         
11.19-5.21_15_min 11/25/2019 22:15      0         
11.19-5.21_15_min 11/25/2019 22:30      0         
11.19-5.21_15_min 11/25/2019 22:45      0         
11.19-5.21_15_min 11/25/2019 23:00      0         
11.19-5.21_15_min 11/25/2019 23:15      0         
11.19-5.21_15_min 11/25/2019 23:30      0         
11.19-5.21_15_min 11/25/2019 23:45      0         
11.19-5.21_15_min 11/26/2019 0:00       0         
11.19-5.21_15_min 11/26/2019 0:15       0         
11.19-5.21_15_min 11/26/2019 0:30       0         
11.19-5.21_15_min 11/26/2019 0:45       0         
11.19-5.21_15_min 11/26/2019 1:00       0         
11.19-5.21_15_min 11/26/2019 1:15       0         
11.19-5.21_15_min 11/26/2019 1:30       0         
11.19-5.21_15_min 11/26/2019 1:45       0         
11.19-5.21_15_min 11/26/2019 2:00       0         
11.19-5.21_15_min 11/26/2019 2:15       0         
11.19-5.21_15_min 11/26/2019 2:30       0         
11.19-5.21_15_min 11/26/2019 2:45       0         
11.19-5.21_15_min 11/26/2019 3:00       0         
11.19-5.21_15_min 11/26/2019 3:15       0         
11.19-5.21_15_min 11/26/2019 3:30       0         
11.19-5.21_15_min 11/26/2019 3:45       0         
11.19-5.21_15_min 11/26/2019 4:00       0         
11.19-5.21_15_min 11/26/2019 4:15       0         
11.19-5.21_15_min 11/26/2019 4:30       0         
11.19-5.21_15_min 11/26/2019 4:45       0         
11.19-5.21_15_min 11/26/2019 5:00       0         
11.19-5.21_15_min 11/26/2019 5:15       0         
11.19-5.21_15_min 11/26/2019 5:30       0         
11.19-5.21_15_min 11/26/2019 5:45       0         
11.19-5.21_15_min 11/26/2019 6:00       0         
11.19-5.21_15_min 11/26/2019 6:15       0         
11.19-5.21_15_min 11/26/2019 6:30       0         
11.19-5.21_15_min 11/26/2019 6:45       0         
11.19-5.21_15_min 11/26/2019 7:00       0         
11.19-5.21_15_min 11/26/2019 7:15       0         
11.19-5.21_15_min 11/26/2019 7:30       0         
11.19-5.21_15_min 11/26/2019 7:45       0         
11.19-5.21_15_min 11/26/2019 8:00       0         
11.19-5.21_15_min 11/26/2019 8:15       0         
11.19-5.21_15_min 11/26/2019 8:30       0         
11.19-5.21_15_min 11/26/2019 8:45       0         
11.19-5.21_15_min 11/26/2019 9:00       0         
11.19-5.21_15_min 11/26/2019 9:15       0         
11.19-5.21_15_min 11/26/2019 9:30       0         
11.19-5.21_15_min 11/26/2019 9:45       0         
11.19-5.21_15_min 11/26/2019 10:00      0         
11.19-5.21_15_min 11/26/2019 10:15      0         
11.19-5.21_15_min 11/26/2019 10:30      0         
11.19-5.21_15_min 11/26/2019 10:45      0         
11.19-5.21_15_min 11/26/2019 11:00      0         
11.19-5.21_15_min 11/26/2019 11:15      0         
11.19-5.21_15_min 11/26/2019 11:30      0         
11.19-5.21_15_min 11/26/2019 11:45      0         
11.19-5.21_15_min 11/26/2019 12:00      0         
11.19-5.21_15_min 11/26/2019 12:15      0         
11.19-5.21_15_min 11/26/2019 12:30      0         
11.19-5.21_15_min 11/26/2019 12:45      0         
11.19-5.21_15_min 11/26/2019 13:00      0         
11.19-5.21_15_min 11/26/2019 13:15      0         
11.19-5.21_15_min 11/26/2019 13:30      0         
11.19-5.21_15_min 11/26/2019 13:45      0         
11.19-5.21_15_min 11/26/2019 14:00      0         
11.19-5.21_15_min 11/26/2019 14:15      0         
11.19-5.21_15_min 11/26/2019 14:30      0         
11.19-5.21_15_min 11/26/2019 14:45      0         
11.19-5.21_15_min 11/26/2019 15:00      0         
11.19-5.21_15_min 11/26/2019 15:15      0         
11.19-5.21_15_min 11/26/2019 15:30      0         
11.19-5.21_15_min 11/26/2019 15:45      0         
11.19-5.21_15_min 11/26/2019 16:00      0         
11.19-5.21_15_min 11/26/2019 16:15      0         
11.19-5.21_15_min 11/26/2019 16:30      0         
11.19-5.21_15_min 11/26/2019 16:45      0         
11.19-5.21_15_min 11/26/2019 17:00      0         
11.19-5.21_15_min 11/26/2019 17:15      0         
11.19-5.21_15_min 11/26/2019 17:30      0         
11.19-5.21_15_min 11/26/2019 17:45      0         
11.19-5.21_15_min 11/26/2019 18:00      0         
11.19-5.21_15_min 11/26/2019 18:15      0         
11.19-5.21_15_min 11/26/2019 18:30      0         
11.19-5.21_15_min 11/26/2019 18:45      0         
11.19-5.21_15_min 11/26/2019 19:00      0         
11.19-5.21_15_min 11/26/2019 19:15      0         
11.19-5.21_15_min 11/26/2019 19:30      0         
11.19-5.21_15_min 11/26/2019 19:45      0         
11.19-5.21_15_min 11/26/2019 20:00      0         
11.19-5.21_15_min 11/26/2019 20:15      0         
11.19-5.21_15_min 11/26/2019 20:30      0         
11.19-5.21_15_min 11/26/2019 20:45      0         
11.19-5.21_15_min 11/26/2019 21:00      0         
11.19-5.21_15_min 11/26/2019 21:15      0         
11.19-5.21_15_min 11/26/2019 21:30      0         
11.19-5.21_15_min 11/26/2019 21:45      0         
11.19-5.21_15_min 11/26/2019 22:00      0         
11.19-5.21_15_min 11/26/2019 22:15      0         
11.19-5.21_15_min 11/26/2019 22:30      0         
11.19-5.21_15_min 11/26/2019 22:45      0         
11.19-5.21_15_min 11/26/2019 23:00      0         
11.19-5.21_15_min 11/26/2019 23:15      0         
11.19-5.21_15_min 11/26/2019 23:30      0         
11.19-5.21_15_min 11/26/2019 23:45      0         
11.19-5.21_15_min 11/27/2019 0:00       0         
11.19-5.21_15_min 11/27/2019 0:15       0         
11.19-5.21_15_min 11/27/2019 0:30       0         
11.19-5.21_15_min 11/27/2019 0:45       0         
11.19-5.21_15_min 11/27/2019 1:00       0         
11.19-5.21_15_min 11/27/2019 1:15       0         
11.19-5.21_15_min 11/27/2019 1:30       0         
11.19-5.21_15_min 11/27/2019 1:45       0         
11.19-5.21_15_min 11/27/2019 2:00       0         
11.19-5.21_15_min 11/27/2019 2:15       0         
11.19-5.21_15_min 11/27/2019 2:30       0         
11.19-5.21_15_min 11/27/2019 2:45       0         
11.19-5.21_15_min 11/27/2019 3:00       0         
11.19-5.21_15_min 11/27/2019 3:15       0         
11.19-5.21_15_min 11/27/2019 3:30       0         
11.19-5.21_15_min 11/27/2019 3:45       0         
11.19-5.21_15_min 11/27/2019 4:00       0         
11.19-5.21_15_min 11/27/2019 4:15       0         
11.19-5.21_15_min 11/27/2019 4:30       0         
11.19-5.21_15_min 11/27/2019 4:45       0         
11.19-5.21_15_min 11/27/2019 5:00       0         
11.19-5.21_15_min 11/27/2019 5:15       0         
11.19-5.21_15_min 11/27/2019 5:30       0         
11.19-5.21_15_min 11/27/2019 5:45       0         
11.19-5.21_15_min 11/27/2019 6:00       0         
11.19-5.21_15_min 11/27/2019 6:15       0         
11.19-5.21_15_min 11/27/2019 6:30       0         
11.19-5.21_15_min 11/27/2019 6:45       0         
11.19-5.21_15_min 11/27/2019 7:00       0         
11.19-5.21_15_min 11/27/2019 7:15       0         
11.19-5.21_15_min 11/27/2019 7:30       0         
11.19-5.21_15_min 11/27/2019 7:45       0         
11.19-5.21_15_min 11/27/2019 8:00       0         
11.19-5.21_15_min 11/27/2019 8:15       0         
11.19-5.21_15_min 11/27/2019 8:30       0         
11.19-5.21_15_min 11/27/2019 8:45       0         
11.19-5.21_15_min 11/27/2019 9:00       0         
11.19-5.21_15_min 11/27/2019 9:15       0         
11.19-5.21_15_min 11/27/2019 9:30       0         
11.19-5.21_15_min 11/27/2019 9:45       0         
11.19-5.21_15_min 11/27/2019 10:00      0         
11.19-5.21_15_min 11/27/2019 10:15      0         
11.19-5.21_15_min 11/27/2019 10:30      0         
11.19-5.21_15_min 11/27/2019 10:45      0         
11.19-5.21_15_min 11/27/2019 11:00      0         
11.19-5.21_15_min 11/27/2019 11:15      0         
11.19-5.21_15_min 11/27/2019 11:30      0         
11.19-5.21_15_min 11/27/2019 11:45      0         
11.19-5.21_15_min 11/27/2019 12:00      0         
11.19-5.21_15_min 11/27/2019 12:15      0         
11.19-5.21_15_min 11/27/2019 12:30      0         
11.19-5.21_15_min 11/27/2019 12:45      0         
11.19-5.21_15_min 11/27/2019 13:00      0         
11.19-5.21_15_min 11/27/2019 13:15      0         
11.19-5.21_15_min 11/27/2019 13:30      0         
11.19-5.21_15_min 11/27/2019 13:45      0         
11.19-5.21_15_min 11/27/2019 14:00      0         
11.19-5.21_15_min 11/27/2019 14:15      0         
11.19-5.21_15_min 11/27/2019 14:30      0         
11.19-5.21_15_min 11/27/2019 14:45      0         
11.19-5.21_15_min 11/27/2019 15:00      0         
11.19-5.21_15_min 11/27/2019 15:15      0         
11.19-5.21_15_min 11/27/2019 15:30      0         
11.19-5.21_15_min 11/27/2019 15:45      0         
11.19-5.21_15_min 11/27/2019 16:00      0         
11.19-5.21_15_min 11/27/2019 16:15      0         
11.19-5.21_15_min 11/27/2019 16:30      0         
11.19-5.21_15_min 11/27/2019 16:45      0         
11.19-5.21_15_min 11/27/2019 17:00      0         
11.19-5.21_15_min 11/27/2019 17:15      0         
11.19-5.21_15_min 11/27/2019 17:30      0         
11.19-5.21_15_min 11/27/2019 17:45      0         
11.19-5.21_15_min 11/27/2019 18:00      0.01      
11.19-5.21_15_min 11/27/2019 18:15      0.01      
11.19-5.21_15_min 11/27/2019 18:30      0.03      
11.19-5.21_15_min 11/27/2019 18:45      0.03      
11.19-5.21_15_min 11/27/2019 19:00      0.03      
11.19-5.21_15_min 11/27/2019 19:15      0         
11.19-5.21_15_min 11/27/2019 19:30      0         
11.19-5.21_15_min 11/27/2019 19:45      0         
11.19-5.21_15_min 11/27/2019 20:00      0.01      
11.19-5.21_15_min 11/27/2019 20:15      0         
11.19-5.21_15_min 11/27/2019 20:30      0         
11.19-5.21_15_min 11/27/2019 20:45      0         
11.19-5.21_15_min 11/27/2019 21:00      0         
11.19-5.21_15_min 11/27/2019 21:15      0         
11.19-5.21_15_min 11/27/2019 21:30      0         
11.19-5.21_15_min 11/27/2019 21:45      0         
11.19-5.21_15_min 11/27/2019 22:00      0         
11.19-5.21_15_min 11/27/2019 22:15      0         
11.19-5.21_15_min 11/27/2019 22:30      0         
11.19-5.21_15_min 11/27/2019 22:45      0         
11.19-5.21_15_min 11/27/2019 23:00      0         
11.19-5.21_15_min 11/27/2019 23:15      0         
11.19-5.21_15_min 11/27/2019 23:30      0         
11.19-5.21_15_min 11/27/2019 23:45      0         
11.19-5.21_15_min 11/28/2019 0:00       0         
11.19-5.21_15_min 11/28/2019 0:15       0         
11.19-5.21_15_min 11/28/2019 0:30       0         
11.19-5.21_15_min 11/28/2019 0:45       0         
11.19-5.21_15_min 11/28/2019 1:00       0         
11.19-5.21_15_min 11/28/2019 1:15       0         
11.19-5.21_15_min 11/28/2019 1:30       0         
11.19-5.21_15_min 11/28/2019 1:45       0         
11.19-5.21_15_min 11/28/2019 2:00       0         
11.19-5.21_15_min 11/28/2019 2:15       0         
11.19-5.21_15_min 11/28/2019 2:30       0         
11.19-5.21_15_min 11/28/2019 2:45       0         
11.19-5.21_15_min 11/28/2019 3:00       0         
11.19-5.21_15_min 11/28/2019 3:15       0         
11.19-5.21_15_min 11/28/2019 3:30       0         
11.19-5.21_15_min 11/28/2019 3:45       0         
11.19-5.21_15_min 11/28/2019 4:00       0         
11.19-5.21_15_min 11/28/2019 4:15       0         
11.19-5.21_15_min 11/28/2019 4:30       0         
11.19-5.21_15_min 11/28/2019 4:45       0         
11.19-5.21_15_min 11/28/2019 5:00       0         
11.19-5.21_15_min 11/28/2019 5:15       0         
11.19-5.21_15_min 11/28/2019 5:30       0         
11.19-5.21_15_min 11/28/2019 5:45       0         
11.19-5.21_15_min 11/28/2019 6:00       0         
11.19-5.21_15_min 11/28/2019 6:15       0         
11.19-5.21_15_min 11/28/2019 6:30       0         
11.19-5.21_15_min 11/28/2019 6:45       0         
11.19-5.21_15_min 11/28/2019 7:00       0         
11.19-5.21_15_min 11/28/2019 7:15       0         
11.19-5.21_15_min 11/28/2019 7:30       0         
11.19-5.21_15_min 11/28/2019 7:45       0         
11.19-5.21_15_min 11/28/2019 8:00       0         
11.19-5.21_15_min 11/28/2019 8:15       0         
11.19-5.21_15_min 11/28/2019 8:30       0         
11.19-5.21_15_min 11/28/2019 8:45       0         
11.19-5.21_15_min 11/28/2019 9:00       0         
11.19-5.21_15_min 11/28/2019 9:15       0         
11.19-5.21_15_min 11/28/2019 9:30       0         
11.19-5.21_15_min 11/28/2019 9:45       0         
11.19-5.21_15_min 11/28/2019 10:00      0         
11.19-5.21_15_min 11/28/2019 10:15      0         
11.19-5.21_15_min 11/28/2019 10:30      0         
11.19-5.21_15_min 11/28/2019 10:45      0         
11.19-5.21_15_min 11/28/2019 11:00      0         
11.19-5.21_15_min 11/28/2019 11:15      0         
11.19-5.21_15_min 11/28/2019 11:30      0         
11.19-5.21_15_min 11/28/2019 11:45      0         
11.19-5.21_15_min 11/28/2019 12:00      0         
11.19-5.21_15_min 11/28/2019 12:15      0         
11.19-5.21_15_min 11/28/2019 12:30      0         
11.19-5.21_15_min 11/28/2019 12:45      0         
11.19-5.21_15_min 11/28/2019 13:00      0         
11.19-5.21_15_min 11/28/2019 13:15      0         
11.19-5.21_15_min 11/28/2019 13:30      0         
11.19-5.21_15_min 11/28/2019 13:45      0         
11.19-5.21_15_min 11/28/2019 14:00      0         
11.19-5.21_15_min 11/28/2019 14:15      0         
11.19-5.21_15_min 11/28/2019 14:30      0         
11.19-5.21_15_min 11/28/2019 14:45      0         
11.19-5.21_15_min 11/28/2019 15:00      0         
11.19-5.21_15_min 11/28/2019 15:15      0         
11.19-5.21_15_min 11/28/2019 15:30      0         
11.19-5.21_15_min 11/28/2019 15:45      0         
11.19-5.21_15_min 11/28/2019 16:00      0         
11.19-5.21_15_min 11/28/2019 16:15      0         
11.19-5.21_15_min 11/28/2019 16:30      0         
11.19-5.21_15_min 11/28/2019 16:45      0         
11.19-5.21_15_min 11/28/2019 17:00      0         
11.19-5.21_15_min 11/28/2019 17:15      0         
11.19-5.21_15_min 11/28/2019 17:30      0         
11.19-5.21_15_min 11/28/2019 17:45      0         
11.19-5.21_15_min 11/28/2019 18:00      0         
11.19-5.21_15_min 11/28/2019 18:15      0         
11.19-5.21_15_min 11/28/2019 18:30      0         
11.19-5.21_15_min 11/28/2019 18:45      0         
11.19-5.21_15_min 11/28/2019 19:00      0         
11.19-5.21_15_min 11/28/2019 19:15      0         
11.19-5.21_15_min 11/28/2019 19:30      0         
11.19-5.21_15_min 11/28/2019 19:45      0         
11.19-5.21_15_min 11/28/2019 20:00      0         
11.19-5.21_15_min 11/28/2019 20:15      0         
11.19-5.21_15_min 11/28/2019 20:30      0         
11.19-5.21_15_min 11/28/2019 20:45      0         
11.19-5.21_15_min 11/28/2019 21:00      0         
11.19-5.21_15_min 11/28/2019 21:15      0         
11.19-5.21_15_min 11/28/2019 21:30      0         
11.19-5.21_15_min 11/28/2019 21:45      0         
11.19-5.21_15_min 11/28/2019 22:00      0         
11.19-5.21_15_min 11/28/2019 22:15      0         
11.19-5.21_15_min 11/28/2019 22:30      0         
11.19-5.21_15_min 11/28/2019 22:45      0         
11.19-5.21_15_min 11/28/2019 23:00      0         
11.19-5.21_15_min 11/28/2019 23:15      0         
11.19-5.21_15_min 11/28/2019 23:30      0         
11.19-5.21_15_min 11/28/2019 23:45      0         
11.19-5.21_15_min 11/29/2019 0:00       0         
11.19-5.21_15_min 11/29/2019 0:15       0         
11.19-5.21_15_min 11/29/2019 0:30       0         
11.19-5.21_15_min 11/29/2019 0:45       0         
11.19-5.21_15_min 11/29/2019 1:00       0         
11.19-5.21_15_min 11/29/2019 1:15       0         
11.19-5.21_15_min 11/29/2019 1:30       0         
11.19-5.21_15_min 11/29/2019 1:45       0         
11.19-5.21_15_min 11/29/2019 2:00       0         
11.19-5.21_15_min 11/29/2019 2:15       0         
11.19-5.21_15_min 11/29/2019 2:30       0         
11.19-5.21_15_min 11/29/2019 2:45       0         
11.19-5.21_15_min 11/29/2019 3:00       0         
11.19-5.21_15_min 11/29/2019 3:15       0         
11.19-5.21_15_min 11/29/2019 3:30       0         
11.19-5.21_15_min 11/29/2019 3:45       0         
11.19-5.21_15_min 11/29/2019 4:00       0         
11.19-5.21_15_min 11/29/2019 4:15       0         
11.19-5.21_15_min 11/29/2019 4:30       0         
11.19-5.21_15_min 11/29/2019 4:45       0         
11.19-5.21_15_min 11/29/2019 5:00       0         
11.19-5.21_15_min 11/29/2019 5:15       0         
11.19-5.21_15_min 11/29/2019 5:30       0         
11.19-5.21_15_min 11/29/2019 5:45       0         
11.19-5.21_15_min 11/29/2019 6:00       0         
11.19-5.21_15_min 11/29/2019 6:15       0         
11.19-5.21_15_min 11/29/2019 6:30       0         
11.19-5.21_15_min 11/29/2019 6:45       0         
11.19-5.21_15_min 11/29/2019 7:00       0         
11.19-5.21_15_min 11/29/2019 7:15       0         
11.19-5.21_15_min 11/29/2019 7:30       0         
11.19-5.21_15_min 11/29/2019 7:45       0         
11.19-5.21_15_min 11/29/2019 8:00       0         
11.19-5.21_15_min 11/29/2019 8:15       0         
11.19-5.21_15_min 11/29/2019 8:30       0         
11.19-5.21_15_min 11/29/2019 8:45       0         
11.19-5.21_15_min 11/29/2019 9:00       0         
11.19-5.21_15_min 11/29/2019 9:15       0         
11.19-5.21_15_min 11/29/2019 9:30       0         
11.19-5.21_15_min 11/29/2019 9:45       0         
11.19-5.21_15_min 11/29/2019 10:00      0         
11.19-5.21_15_min 11/29/2019 10:15      0         
11.19-5.21_15_min 11/29/2019 10:30      0         
11.19-5.21_15_min 11/29/2019 10:45      0         
11.19-5.21_15_min 11/29/2019 11:00      0         
11.19-5.21_15_min 11/29/2019 11:15      0         
11.19-5.21_15_min 11/29/2019 11:30      0         
11.19-5.21_15_min 11/29/2019 11:45      0         
11.19-5.21_15_min 11/29/2019 12:00      0         
11.19-5.21_15_min 11/29/2019 12:15      0         
11.19-5.21_15_min 11/29/2019 12:30      0         
11.19-5.21_15_min 11/29/2019 12:45      0         
11.19-5.21_15_min 11/29/2019 13:00      0         
11.19-5.21_15_min 11/29/2019 13:15      0         
11.19-5.21_15_min 11/29/2019 13:30      0         
11.19-5.21_15_min 11/29/2019 13:45      0         
11.19-5.21_15_min 11/29/2019 14:00      0         
11.19-5.21_15_min 11/29/2019 14:15      0         
11.19-5.21_15_min 11/29/2019 14:30      0         
11.19-5.21_15_min 11/29/2019 14:45      0         
11.19-5.21_15_min 11/29/2019 15:00      0         
11.19-5.21_15_min 11/29/2019 15:15      0         
11.19-5.21_15_min 11/29/2019 15:30      0         
11.19-5.21_15_min 11/29/2019 15:45      0         
11.19-5.21_15_min 11/29/2019 16:00      0         
11.19-5.21_15_min 11/29/2019 16:15      0         
11.19-5.21_15_min 11/29/2019 16:30      0         
11.19-5.21_15_min 11/29/2019 16:45      0         
11.19-5.21_15_min 11/29/2019 17:00      0         
11.19-5.21_15_min 11/29/2019 17:15      0         
11.19-5.21_15_min 11/29/2019 17:30      0         
11.19-5.21_15_min 11/29/2019 17:45      0         
11.19-5.21_15_min 11/29/2019 18:00      0         
11.19-5.21_15_min 11/29/2019 18:15      0         
11.19-5.21_15_min 11/29/2019 18:30      0         
11.19-5.21_15_min 11/29/2019 18:45      0         
11.19-5.21_15_min 11/29/2019 19:00      0         
11.19-5.21_15_min 11/29/2019 19:15      0         
11.19-5.21_15_min 11/29/2019 19:30      0         
11.19-5.21_15_min 11/29/2019 19:45      0         
11.19-5.21_15_min 11/29/2019 20:00      0         
11.19-5.21_15_min 11/29/2019 20:15      0         
11.19-5.21_15_min 11/29/2019 20:30      0         
11.19-5.21_15_min 11/29/2019 20:45      0         
11.19-5.21_15_min 11/29/2019 21:00      0         
11.19-5.21_15_min 11/29/2019 21:15      0         
11.19-5.21_15_min 11/29/2019 21:30      0         
11.19-5.21_15_min 11/29/2019 21:45      0         
11.19-5.21_15_min 11/29/2019 22:00      0         
11.19-5.21_15_min 11/29/2019 22:15      0         
11.19-5.21_15_min 11/29/2019 22:30      0         
11.19-5.21_15_min 11/29/2019 22:45      0         
11.19-5.21_15_min 11/29/2019 23:00      0         
11.19-5.21_15_min 11/29/2019 23:15      0         
11.19-5.21_15_min 11/29/2019 23:30      0         
11.19-5.21_15_min 11/29/2019 23:45      0         
11.19-5.21_15_min 11/30/2019 0:00       0         
11.19-5.21_15_min 11/30/2019 0:15       0         
11.19-5.21_15_min 11/30/2019 0:30       0         
11.19-5.21_15_min 11/30/2019 0:45       0         
11.19-5.21_15_min 11/30/2019 1:00       0         
11.19-5.21_15_min 11/30/2019 1:15       0         
11.19-5.21_15_min 11/30/2019 1:30       0         
11.19-5.21_15_min 11/30/2019 1:45       0         
11.19-5.21_15_min 11/30/2019 2:00       0         
11.19-5.21_15_min 11/30/2019 2:15       0         
11.19-5.21_15_min 11/30/2019 2:30       0         
11.19-5.21_15_min 11/30/2019 2:45       0         
11.19-5.21_15_min 11/30/2019 3:00       0         
11.19-5.21_15_min 11/30/2019 3:15       0         
11.19-5.21_15_min 11/30/2019 3:30       0         
11.19-5.21_15_min 11/30/2019 3:45       0         
11.19-5.21_15_min 11/30/2019 4:00       0         
11.19-5.21_15_min 11/30/2019 4:15       0         
11.19-5.21_15_min 11/30/2019 4:30       0         
11.19-5.21_15_min 11/30/2019 4:45       0         
11.19-5.21_15_min 11/30/2019 5:00       0         
11.19-5.21_15_min 11/30/2019 5:15       0         
11.19-5.21_15_min 11/30/2019 5:30       0         
11.19-5.21_15_min 11/30/2019 5:45       0         
11.19-5.21_15_min 11/30/2019 6:00       0         
11.19-5.21_15_min 11/30/2019 6:15       0         
11.19-5.21_15_min 11/30/2019 6:30       0         
11.19-5.21_15_min 11/30/2019 6:45       0         
11.19-5.21_15_min 11/30/2019 7:00       0         
11.19-5.21_15_min 11/30/2019 7:15       0         
11.19-5.21_15_min 11/30/2019 7:30       0         
11.19-5.21_15_min 11/30/2019 7:45       0         
11.19-5.21_15_min 11/30/2019 8:00       0         
11.19-5.21_15_min 11/30/2019 8:15       0         
11.19-5.21_15_min 11/30/2019 8:30       0         
11.19-5.21_15_min 11/30/2019 8:45       0         
11.19-5.21_15_min 11/30/2019 9:00       0         
11.19-5.21_15_min 11/30/2019 9:15       0         
11.19-5.21_15_min 11/30/2019 9:30       0         
11.19-5.21_15_min 11/30/2019 9:45       0         
11.19-5.21_15_min 11/30/2019 10:00      0         
11.19-5.21_15_min 11/30/2019 10:15      0         
11.19-5.21_15_min 11/30/2019 10:30      0         
11.19-5.21_15_min 11/30/2019 10:45      0         
11.19-5.21_15_min 11/30/2019 11:00      0         
11.19-5.21_15_min 11/30/2019 11:15      0         
11.19-5.21_15_min 11/30/2019 11:30      0         
11.19-5.21_15_min 11/30/2019 11:45      0         
11.19-5.21_15_min 11/30/2019 12:00      0         
11.19-5.21_15_min 11/30/2019 12:15      0         
11.19-5.21_15_min 11/30/2019 12:30      0         
11.19-5.21_15_min 11/30/2019 12:45      0         
11.19-5.21_15_min 11/30/2019 13:00      0         
11.19-5.21_15_min 11/30/2019 13:15      0         
11.19-5.21_15_min 11/30/2019 13:30      0         
11.19-5.21_15_min 11/30/2019 13:45      0         
11.19-5.21_15_min 11/30/2019 14:00      0         
11.19-5.21_15_min 11/30/2019 14:15      0         
11.19-5.21_15_min 11/30/2019 14:30      0         
11.19-5.21_15_min 11/30/2019 14:45      0         
11.19-5.21_15_min 11/30/2019 15:00      0         
11.19-5.21_15_min 11/30/2019 15:15      0         
11.19-5.21_15_min 11/30/2019 15:30      0         
11.19-5.21_15_min 11/30/2019 15:45      0         
11.19-5.21_15_min 11/30/2019 16:00      0         
11.19-5.21_15_min 11/30/2019 16:15      0         
11.19-5.21_15_min 11/30/2019 16:30      0         
11.19-5.21_15_min 11/30/2019 16:45      0         
11.19-5.21_15_min 11/30/2019 17:00      0         
11.19-5.21_15_min 11/30/2019 17:15      0         
11.19-5.21_15_min 11/30/2019 17:30      0         
11.19-5.21_15_min 11/30/2019 17:45      0         
11.19-5.21_15_min 11/30/2019 18:00      0         
11.19-5.21_15_min 11/30/2019 18:15      0         
11.19-5.21_15_min 11/30/2019 18:30      0         
11.19-5.21_15_min 11/30/2019 18:45      0         
11.19-5.21_15_min 11/30/2019 19:00      0         
11.19-5.21_15_min 11/30/2019 19:15      0         
11.19-5.21_15_min 11/30/2019 19:30      0         
11.19-5.21_15_min 11/30/2019 19:45      0         
11.19-5.21_15_min 11/30/2019 20:00      0         
11.19-5.21_15_min 11/30/2019 20:15      0         
11.19-5.21_15_min 11/30/2019 20:30      0         
11.19-5.21_15_min 11/30/2019 20:45      0         
11.19-5.21_15_min 11/30/2019 21:00      0         
11.19-5.21_15_min 11/30/2019 21:15      0         
11.19-5.21_15_min 11/30/2019 21:30      0         
11.19-5.21_15_min 11/30/2019 21:45      0         
11.19-5.21_15_min 11/30/2019 22:00      0         
11.19-5.21_15_min 11/30/2019 22:15      0         
11.19-5.21_15_min 11/30/2019 22:30      0         
11.19-5.21_15_min 11/30/2019 22:45      0         
11.19-5.21_15_min 11/30/2019 23:00      0         
11.19-5.21_15_min 11/30/2019 23:15      0         
11.19-5.21_15_min 11/30/2019 23:30      0         
11.19-5.21_15_min 11/30/2019 23:45      0         
11.19-5.21_15_min 12/1/2019  0:00       0         
11.19-5.21_15_min 12/1/2019  0:15       0         
11.19-5.21_15_min 12/1/2019  0:30       0         
11.19-5.21_15_min 12/1/2019  0:45       0         
11.19-5.21_15_min 12/1/2019  1:00       0         
11.19-5.21_15_min 12/1/2019  1:15       0         
11.19-5.21_15_min 12/1/2019  1:30       0         
11.19-5.21_15_min 12/1/2019  1:45       0         
11.19-5.21_15_min 12/1/2019  2:00       0         
11.19-5.21_15_min 12/1/2019  2:15       0         
11.19-5.21_15_min 12/1/2019  2:30       0         
11.19-5.21_15_min 12/1/2019  2:45       0         
11.19-5.21_15_min 12/1/2019  3:00       0         
11.19-5.21_15_min 12/1/2019  3:15       0         
11.19-5.21_15_min 12/1/2019  3:30       0         
11.19-5.21_15_min 12/1/2019  3:45       0         
11.19-5.21_15_min 12/1/2019  4:00       0         
11.19-5.21_15_min 12/1/2019  4:15       0         
11.19-5.21_15_min 12/1/2019  4:30       0         
11.19-5.21_15_min 12/1/2019  4:45       0         
11.19-5.21_15_min 12/1/2019  5:00       0         
11.19-5.21_15_min 12/1/2019  5:15       0         
11.19-5.21_15_min 12/1/2019  5:30       0         
11.19-5.21_15_min 12/1/2019  5:45       0         
11.19-5.21_15_min 12/1/2019  6:00       0         
11.19-5.21_15_min 12/1/2019  6:15       0         
11.19-5.21_15_min 12/1/2019  6:30       0         
11.19-5.21_15_min 12/1/2019  6:45       0         
11.19-5.21_15_min 12/1/2019  7:00       0         
11.19-5.21_15_min 12/1/2019  7:15       0         
11.19-5.21_15_min 12/1/2019  7:30       0         
11.19-5.21_15_min 12/1/2019  7:45       0         
11.19-5.21_15_min 12/1/2019  8:00       0         
11.19-5.21_15_min 12/1/2019  8:15       0         
11.19-5.21_15_min 12/1/2019  8:30       0         
11.19-5.21_15_min 12/1/2019  8:45       0         
11.19-5.21_15_min 12/1/2019  9:00       0         
11.19-5.21_15_min 12/1/2019  9:15       0         
11.19-5.21_15_min 12/1/2019  9:30       0         
11.19-5.21_15_min 12/1/2019  9:45       0         
11.19-5.21_15_min 12/1/2019  10:00      0         
11.19-5.21_15_min 12/1/2019  10:15      0         
11.19-5.21_15_min 12/1/2019  10:30      0         
11.19-5.21_15_min 12/1/2019  10:45      0         
11.19-5.21_15_min 12/1/2019  11:00      0         
11.19-5.21_15_min 12/1/2019  11:15      0         
11.19-5.21_15_min 12/1/2019  11:30      0         
11.19-5.21_15_min 12/1/2019  11:45      0         
11.19-5.21_15_min 12/1/2019  12:00      0         
11.19-5.21_15_min 12/1/2019  12:15      0         
11.19-5.21_15_min 12/1/2019  12:30      0         
11.19-5.21_15_min 12/1/2019  12:45      0         
11.19-5.21_15_min 12/1/2019  13:00      0         
11.19-5.21_15_min 12/1/2019  13:15      0         
11.19-5.21_15_min 12/1/2019  13:30      0         
11.19-5.21_15_min 12/1/2019  13:45      0         
11.19-5.21_15_min 12/1/2019  14:00      0         
11.19-5.21_15_min 12/1/2019  14:15      0         
11.19-5.21_15_min 12/1/2019  14:30      0         
11.19-5.21_15_min 12/1/2019  14:45      0         
11.19-5.21_15_min 12/1/2019  15:00      0         
11.19-5.21_15_min 12/1/2019  15:15      0         
11.19-5.21_15_min 12/1/2019  15:30      0.01      
11.19-5.21_15_min 12/1/2019  15:45      0         
11.19-5.21_15_min 12/1/2019  16:00      0         
11.19-5.21_15_min 12/1/2019  17:00      0.01      
11.19-5.21_15_min 12/1/2019  17:15      0.01      
11.19-5.21_15_min 12/1/2019  18:15      0         
11.19-5.21_15_min 12/1/2019  18:30      0         
11.19-5.21_15_min 12/1/2019  18:45      0.01      
11.19-5.21_15_min 12/1/2019  19:00      0.04      
11.19-5.21_15_min 12/1/2019  19:15      0.08      
11.19-5.21_15_min 12/1/2019  19:30      0.05      
11.19-5.21_15_min 12/1/2019  19:45      0.03      
11.19-5.21_15_min 12/1/2019  20:00      0.05      
11.19-5.21_15_min 12/1/2019  20:15      0.06      
11.19-5.21_15_min 12/1/2019  20:30      0.07      
11.19-5.21_15_min 12/1/2019  20:45      0.09      
11.19-5.21_15_min 12/1/2019  21:00      0.02      
11.19-5.21_15_min 12/1/2019  21:15      0.05      
11.19-5.21_15_min 12/1/2019  21:30      0.01      
11.19-5.21_15_min 12/1/2019  21:45      0         
11.19-5.21_15_min 12/1/2019  22:00      0.03      
11.19-5.21_15_min 12/1/2019  22:15      0.01      
11.19-5.21_15_min 12/1/2019  22:30      0         
11.19-5.21_15_min 12/1/2019  22:45      0.01      
11.19-5.21_15_min 12/1/2019  23:00      0         
11.19-5.21_15_min 12/1/2019  23:15      0         
11.19-5.21_15_min 12/1/2019  23:30      0         
11.19-5.21_15_min 12/1/2019  23:45      0         
11.19-5.21_15_min 12/2/2019  0:00       0         
11.19-5.21_15_min 12/2/2019  0:15       0         
11.19-5.21_15_min 12/2/2019  0:30       0         
11.19-5.21_15_min 12/2/2019  0:45       0         
11.19-5.21_15_min 12/2/2019  1:00       0         
11.19-5.21_15_min 12/2/2019  1:15       0         
11.19-5.21_15_min 12/2/2019  1:30       0         
11.19-5.21_15_min 12/2/2019  1:45       0         
11.19-5.21_15_min 12/2/2019  2:00       0         
11.19-5.21_15_min 12/2/2019  2:15       0         
11.19-5.21_15_min 12/2/2019  2:30       0         
11.19-5.21_15_min 12/2/2019  2:45       0         
11.19-5.21_15_min 12/2/2019  3:00       0         
11.19-5.21_15_min 12/2/2019  3:15       0         
11.19-5.21_15_min 12/2/2019  3:30       0         
11.19-5.21_15_min 12/2/2019  3:45       0         
11.19-5.21_15_min 12/2/2019  4:00       0         
11.19-5.21_15_min 12/2/2019  4:15       0         
11.19-5.21_15_min 12/2/2019  4:30       0         
11.19-5.21_15_min 12/2/2019  4:45       0.01      
11.19-5.21_15_min 12/2/2019  5:00       0         
11.19-5.21_15_min 12/2/2019  5:15       0         
11.19-5.21_15_min 12/2/2019  5:30       0         
11.19-5.21_15_min 12/2/2019  5:45       0         
11.19-5.21_15_min 12/2/2019  6:00       0         
11.19-5.21_15_min 12/2/2019  6:15       0         
11.19-5.21_15_min 12/2/2019  6:30       0         
11.19-5.21_15_min 12/2/2019  6:45       0         
11.19-5.21_15_min 12/2/2019  7:00       0         
11.19-5.21_15_min 12/2/2019  7:15       0         
11.19-5.21_15_min 12/2/2019  7:30       0         
11.19-5.21_15_min 12/2/2019  7:45       0         
11.19-5.21_15_min 12/2/2019  8:00       0         
11.19-5.21_15_min 12/2/2019  8:15       0         
11.19-5.21_15_min 12/2/2019  8:30       0         
11.19-5.21_15_min 12/2/2019  8:45       0         
11.19-5.21_15_min 12/2/2019  9:00       0         
11.19-5.21_15_min 12/2/2019  9:15       0         
11.19-5.21_15_min 12/2/2019  9:30       0         
11.19-5.21_15_min 12/2/2019  9:45       0         
11.19-5.21_15_min 12/2/2019  10:00      0         
11.19-5.21_15_min 12/2/2019  10:15      0         
11.19-5.21_15_min 12/2/2019  10:30      0         
11.19-5.21_15_min 12/2/2019  10:45      0         
11.19-5.21_15_min 12/2/2019  11:00      0         
11.19-5.21_15_min 12/2/2019  11:15      0         
11.19-5.21_15_min 12/2/2019  11:30      0         
11.19-5.21_15_min 12/2/2019  11:45      0         
11.19-5.21_15_min 12/2/2019  12:00      0         
11.19-5.21_15_min 12/2/2019  12:15      0.01      
11.19-5.21_15_min 12/2/2019  12:30      0         
11.19-5.21_15_min 12/2/2019  12:45      0         
11.19-5.21_15_min 12/2/2019  13:00      0         
11.19-5.21_15_min 12/2/2019  13:15      0         
11.19-5.21_15_min 12/2/2019  13:30      0         
11.19-5.21_15_min 12/2/2019  13:45      0         
11.19-5.21_15_min 12/2/2019  14:00      0         
11.19-5.21_15_min 12/2/2019  14:15      0         
11.19-5.21_15_min 12/2/2019  14:30      0         
11.19-5.21_15_min 12/2/2019  14:45      0         
11.19-5.21_15_min 12/2/2019  15:00      0         
11.19-5.21_15_min 12/2/2019  15:15      0         
11.19-5.21_15_min 12/2/2019  15:30      0         
11.19-5.21_15_min 12/2/2019  15:45      0         
11.19-5.21_15_min 12/2/2019  16:00      0         
11.19-5.21_15_min 12/2/2019  16:15      0         
11.19-5.21_15_min 12/2/2019  16:30      0         
11.19-5.21_15_min 12/2/2019  16:45      0         
11.19-5.21_15_min 12/2/2019  17:00      0         
11.19-5.21_15_min 12/2/2019  17:15      0         
11.19-5.21_15_min 12/2/2019  17:30      0         
11.19-5.21_15_min 12/2/2019  17:45      0         
11.19-5.21_15_min 12/2/2019  18:00      0         
11.19-5.21_15_min 12/2/2019  18:15      0         
11.19-5.21_15_min 12/2/2019  18:30      0         
11.19-5.21_15_min 12/2/2019  18:45      0         
11.19-5.21_15_min 12/2/2019  19:00      0         
11.19-5.21_15_min 12/2/2019  19:15      0         
11.19-5.21_15_min 12/2/2019  19:30      0         
11.19-5.21_15_min 12/2/2019  19:45      0         
11.19-5.21_15_min 12/2/2019  20:00      0         
11.19-5.21_15_min 12/2/2019  20:15      0         
11.19-5.21_15_min 12/2/2019  20:30      0         
11.19-5.21_15_min 12/2/2019  20:45      0         
11.19-5.21_15_min 12/2/2019  21:00      0         
11.19-5.21_15_min 12/2/2019  21:15      0         
11.19-5.21_15_min 12/2/2019  21:30      0         
11.19-5.21_15_min 12/2/2019  21:45      0         
11.19-5.21_15_min 12/2/2019  22:00      0         
11.19-5.21_15_min 12/2/2019  22:15      0         
11.19-5.21_15_min 12/2/2019  22:30      0         
11.19-5.21_15_min 12/2/2019  22:45      0         
11.19-5.21_15_min 12/2/2019  23:00      0         
11.19-5.21_15_min 12/2/2019  23:15      0         
11.19-5.21_15_min 12/2/2019  23:30      0         
11.19-5.21_15_min 12/2/2019  23:45      0         
11.19-5.21_15_min 12/3/2019  0:00       0         
11.19-5.21_15_min 12/3/2019  0:15       0         
11.19-5.21_15_min 12/3/2019  0:30       0         
11.19-5.21_15_min 12/3/2019  0:45       0         
11.19-5.21_15_min 12/3/2019  1:00       0         
11.19-5.21_15_min 12/3/2019  1:15       0         
11.19-5.21_15_min 12/3/2019  1:30       0         
11.19-5.21_15_min 12/3/2019  1:45       0         
11.19-5.21_15_min 12/3/2019  2:00       0         
11.19-5.21_15_min 12/3/2019  2:15       0         
11.19-5.21_15_min 12/3/2019  2:30       0         
11.19-5.21_15_min 12/3/2019  2:45       0.01      
11.19-5.21_15_min 12/3/2019  3:00       0         
11.19-5.21_15_min 12/3/2019  3:15       0         
11.19-5.21_15_min 12/3/2019  3:30       0         
11.19-5.21_15_min 12/3/2019  3:45       0         
11.19-5.21_15_min 12/3/2019  4:30       0         
11.19-5.21_15_min 12/3/2019  4:45       0         
11.19-5.21_15_min 12/3/2019  5:00       0         
11.19-5.21_15_min 12/3/2019  5:15       0         
11.19-5.21_15_min 12/3/2019  5:30       0         
11.19-5.21_15_min 12/3/2019  5:45       0         
11.19-5.21_15_min 12/3/2019  6:00       0         
11.19-5.21_15_min 12/3/2019  6:15       0         
11.19-5.21_15_min 12/3/2019  6:30       0         
11.19-5.21_15_min 12/3/2019  6:45       0         
11.19-5.21_15_min 12/3/2019  7:00       0         
11.19-5.21_15_min 12/3/2019  7:30       0         
11.19-5.21_15_min 12/3/2019  8:45       0         
11.19-5.21_15_min 12/3/2019  9:00       0         
11.19-5.21_15_min 12/3/2019  9:15       0         
11.19-5.21_15_min 12/3/2019  9:30       0         
11.19-5.21_15_min 12/3/2019  9:45       0         
11.19-5.21_15_min 12/3/2019  10:00      0         
11.19-5.21_15_min 12/3/2019  10:15      0         
11.19-5.21_15_min 12/3/2019  10:30      0         
11.19-5.21_15_min 12/3/2019  10:45      0         
11.19-5.21_15_min 12/3/2019  11:00      0         
11.19-5.21_15_min 12/3/2019  11:15      0         
11.19-5.21_15_min 12/3/2019  11:30      0         
11.19-5.21_15_min 12/3/2019  11:45      0         
11.19-5.21_15_min 12/3/2019  12:00      0         
11.19-5.21_15_min 12/3/2019  12:15      0         
11.19-5.21_15_min 12/3/2019  12:30      0         
11.19-5.21_15_min 12/3/2019  12:45      0         
11.19-5.21_15_min 12/3/2019  13:00      0         
11.19-5.21_15_min 12/3/2019  13:15      0         
11.19-5.21_15_min 12/3/2019  13:30      0         
11.19-5.21_15_min 12/3/2019  13:45      0         
11.19-5.21_15_min 12/3/2019  14:00      0         
11.19-5.21_15_min 12/3/2019  14:15      0         
11.19-5.21_15_min 12/3/2019  14:30      0         
11.19-5.21_15_min 12/3/2019  14:45      0         
11.19-5.21_15_min 12/3/2019  15:00      0         
11.19-5.21_15_min 12/3/2019  15:15      0         
11.19-5.21_15_min 12/3/2019  15:30      0         
11.19-5.21_15_min 12/3/2019  15:45      0         
11.19-5.21_15_min 12/3/2019  16:00      0         
11.19-5.21_15_min 12/3/2019  16:15      0         
11.19-5.21_15_min 12/3/2019  16:30      0         
11.19-5.21_15_min 12/3/2019  16:45      0         
11.19-5.21_15_min 12/3/2019  17:00      0         
11.19-5.21_15_min 12/3/2019  17:15      0         
11.19-5.21_15_min 12/3/2019  17:30      0         
11.19-5.21_15_min 12/3/2019  17:45      0         
11.19-5.21_15_min 12/3/2019  18:00      0         
11.19-5.21_15_min 12/3/2019  18:15      0         
11.19-5.21_15_min 12/3/2019  18:30      0         
11.19-5.21_15_min 12/3/2019  18:45      0         
11.19-5.21_15_min 12/3/2019  19:00      0         
11.19-5.21_15_min 12/3/2019  19:15      0         
11.19-5.21_15_min 12/3/2019  19:30      0         
11.19-5.21_15_min 12/3/2019  19:45      0         
11.19-5.21_15_min 12/3/2019  20:00      0         
11.19-5.21_15_min 12/3/2019  20:15      0         
11.19-5.21_15_min 12/3/2019  20:30      0         
11.19-5.21_15_min 12/3/2019  20:45      0         
11.19-5.21_15_min 12/3/2019  21:00      0         
11.19-5.21_15_min 12/3/2019  21:15      0         
11.19-5.21_15_min 12/3/2019  21:30      0         
11.19-5.21_15_min 12/3/2019  21:45      0         
11.19-5.21_15_min 12/3/2019  22:00      0         
11.19-5.21_15_min 12/3/2019  22:15      0         
11.19-5.21_15_min 12/3/2019  22:30      0         
11.19-5.21_15_min 12/3/2019  22:45      0         
11.19-5.21_15_min 12/3/2019  23:00      0         
11.19-5.21_15_min 12/3/2019  23:15      0         
11.19-5.21_15_min 12/3/2019  23:30      0         
11.19-5.21_15_min 12/3/2019  23:45      0         
11.19-5.21_15_min 12/4/2019  0:00       0         
11.19-5.21_15_min 12/4/2019  0:15       0         
11.19-5.21_15_min 12/4/2019  0:30       0         
11.19-5.21_15_min 12/4/2019  0:45       0         
11.19-5.21_15_min 12/4/2019  1:00       0         
11.19-5.21_15_min 12/4/2019  1:15       0         
11.19-5.21_15_min 12/4/2019  2:30       0         
11.19-5.21_15_min 12/4/2019  2:45       0         
11.19-5.21_15_min 12/4/2019  7:45       0         
11.19-5.21_15_min 12/4/2019  8:00       0         
11.19-5.21_15_min 12/4/2019  8:30       0         
11.19-5.21_15_min 12/4/2019  8:45       0         
11.19-5.21_15_min 12/4/2019  9:15       0         
11.19-5.21_15_min 12/4/2019  13:15      0         
11.19-5.21_15_min 12/4/2019  13:30      0         
11.19-5.21_15_min 12/4/2019  13:45      0         
11.19-5.21_15_min 12/4/2019  14:00      0         
11.19-5.21_15_min 12/4/2019  14:45      0         
11.19-5.21_15_min 12/4/2019  15:00      0         
11.19-5.21_15_min 12/4/2019  15:15      0         
11.19-5.21_15_min 12/4/2019  15:30      0         
11.19-5.21_15_min 12/4/2019  15:45      0         
11.19-5.21_15_min 12/4/2019  16:00      0         
11.19-5.21_15_min 12/4/2019  16:15      0         
11.19-5.21_15_min 12/4/2019  16:30      0         
11.19-5.21_15_min 12/4/2019  16:45      0         
11.19-5.21_15_min 12/4/2019  17:00      0         
11.19-5.21_15_min 12/4/2019  17:15      0         
11.19-5.21_15_min 12/4/2019  17:30      0         
11.19-5.21_15_min 12/4/2019  17:45      0         
11.19-5.21_15_min 12/4/2019  18:00      0         
11.19-5.21_15_min 12/4/2019  18:15      0         
11.19-5.21_15_min 12/4/2019  18:30      0         
11.19-5.21_15_min 12/4/2019  18:45      0         
11.19-5.21_15_min 12/4/2019  19:00      0         
11.19-5.21_15_min 12/4/2019  19:15      0         
11.19-5.21_15_min 12/4/2019  19:30      0         
11.19-5.21_15_min 12/4/2019  19:45      0         
11.19-5.21_15_min 12/4/2019  20:00      0         
11.19-5.21_15_min 12/4/2019  20:15      0         
11.19-5.21_15_min 12/4/2019  20:30      0         
11.19-5.21_15_min 12/4/2019  20:45      0         
11.19-5.21_15_min 12/4/2019  21:00      0         
11.19-5.21_15_min 12/4/2019  21:15      0         
11.19-5.21_15_min 12/4/2019  21:30      0         
11.19-5.21_15_min 12/4/2019  21:45      0         
11.19-5.21_15_min 12/4/2019  22:00      0         
11.19-5.21_15_min 12/4/2019  22:15      0         
11.19-5.21_15_min 12/4/2019  22:30      0         
11.19-5.21_15_min 12/4/2019  22:45      0         
11.19-5.21_15_min 12/4/2019  23:00      0         
11.19-5.21_15_min 12/4/2019  23:15      0         
11.19-5.21_15_min 12/4/2019  23:30      0         
11.19-5.21_15_min 12/4/2019  23:45      0         
11.19-5.21_15_min 12/5/2019  0:00       0         
11.19-5.21_15_min 12/5/2019  0:15       0         
11.19-5.21_15_min 12/5/2019  0:30       0         
11.19-5.21_15_min 12/5/2019  0:45       0         
11.19-5.21_15_min 12/5/2019  1:00       0         
11.19-5.21_15_min 12/5/2019  1:15       0         
11.19-5.21_15_min 12/5/2019  1:30       0         
11.19-5.21_15_min 12/5/2019  1:45       0         
11.19-5.21_15_min 12/5/2019  2:00       0         
11.19-5.21_15_min 12/5/2019  2:15       0         
11.19-5.21_15_min 12/5/2019  2:30       0         
11.19-5.21_15_min 12/5/2019  2:45       0         
11.19-5.21_15_min 12/5/2019  3:00       0         
11.19-5.21_15_min 12/5/2019  3:15       0         
11.19-5.21_15_min 12/5/2019  3:30       0         
11.19-5.21_15_min 12/5/2019  3:45       0         
11.19-5.21_15_min 12/5/2019  4:00       0         
11.19-5.21_15_min 12/5/2019  4:15       0         
11.19-5.21_15_min 12/5/2019  4:30       0         
11.19-5.21_15_min 12/5/2019  4:45       0         
11.19-5.21_15_min 12/5/2019  5:00       0         
11.19-5.21_15_min 12/5/2019  5:15       0         
11.19-5.21_15_min 12/5/2019  5:30       0         
11.19-5.21_15_min 12/5/2019  5:45       0         
11.19-5.21_15_min 12/5/2019  6:00       0         
11.19-5.21_15_min 12/5/2019  6:15       0         
11.19-5.21_15_min 12/5/2019  6:30       0         
11.19-5.21_15_min 12/5/2019  6:45       0         
11.19-5.21_15_min 12/5/2019  7:00       0         
11.19-5.21_15_min 12/5/2019  7:15       0         
11.19-5.21_15_min 12/5/2019  7:30       0         
11.19-5.21_15_min 12/5/2019  7:45       0         
11.19-5.21_15_min 12/5/2019  8:00       0         
11.19-5.21_15_min 12/5/2019  8:15       0         
11.19-5.21_15_min 12/5/2019  8:30       0         
11.19-5.21_15_min 12/5/2019  8:45       0         
11.19-5.21_15_min 12/5/2019  9:00       0         
11.19-5.21_15_min 12/5/2019  9:30       0         
11.19-5.21_15_min 12/5/2019  9:45       0         
11.19-5.21_15_min 12/5/2019  10:00      0         
11.19-5.21_15_min 12/5/2019  10:15      0         
11.19-5.21_15_min 12/5/2019  10:30      0         
11.19-5.21_15_min 12/5/2019  10:45      0         
11.19-5.21_15_min 12/5/2019  11:00      0         
11.19-5.21_15_min 12/5/2019  11:15      0         
11.19-5.21_15_min 12/5/2019  11:30      0         
11.19-5.21_15_min 12/5/2019  11:45      0         
11.19-5.21_15_min 12/5/2019  12:00      0         
11.19-5.21_15_min 12/5/2019  12:15      0         
11.19-5.21_15_min 12/5/2019  12:30      0         
11.19-5.21_15_min 12/5/2019  12:45      0         
11.19-5.21_15_min 12/5/2019  13:00      0         
11.19-5.21_15_min 12/5/2019  13:15      0         
11.19-5.21_15_min 12/5/2019  13:30      0         
11.19-5.21_15_min 12/5/2019  13:45      0         
11.19-5.21_15_min 12/5/2019  14:00      0         
11.19-5.21_15_min 12/5/2019  14:15      0         
11.19-5.21_15_min 12/5/2019  14:30      0         
11.19-5.21_15_min 12/5/2019  14:45      0         
11.19-5.21_15_min 12/5/2019  15:00      0         
11.19-5.21_15_min 12/5/2019  15:15      0         
11.19-5.21_15_min 12/5/2019  15:30      0         
11.19-5.21_15_min 12/5/2019  15:45      0         
11.19-5.21_15_min 12/5/2019  16:00      0         
11.19-5.21_15_min 12/5/2019  16:15      0         
11.19-5.21_15_min 12/5/2019  16:30      0         
11.19-5.21_15_min 12/5/2019  16:45      0         
11.19-5.21_15_min 12/5/2019  17:00      0         
11.19-5.21_15_min 12/5/2019  17:15      0         
11.19-5.21_15_min 12/5/2019  17:30      0         
11.19-5.21_15_min 12/5/2019  17:45      0         
11.19-5.21_15_min 12/5/2019  18:00      0         
11.19-5.21_15_min 12/5/2019  18:15      0         
11.19-5.21_15_min 12/5/2019  18:30      0         
11.19-5.21_15_min 12/5/2019  18:45      0         
11.19-5.21_15_min 12/5/2019  19:00      0         
11.19-5.21_15_min 12/5/2019  19:15      0         
11.19-5.21_15_min 12/5/2019  19:30      0         
11.19-5.21_15_min 12/5/2019  19:45      0         
11.19-5.21_15_min 12/5/2019  20:00      0         
11.19-5.21_15_min 12/5/2019  20:15      0         
11.19-5.21_15_min 12/5/2019  20:30      0         
11.19-5.21_15_min 12/5/2019  20:45      0         
11.19-5.21_15_min 12/5/2019  21:00      0         
11.19-5.21_15_min 12/5/2019  21:15      0         
11.19-5.21_15_min 12/5/2019  21:30      0         
11.19-5.21_15_min 12/5/2019  21:45      0         
11.19-5.21_15_min 12/5/2019  22:00      0         
11.19-5.21_15_min 12/5/2019  22:15      0         
11.19-5.21_15_min 12/5/2019  22:30      0         
11.19-5.21_15_min 12/5/2019  22:45      0         
11.19-5.21_15_min 12/5/2019  23:00      0         
11.19-5.21_15_min 12/5/2019  23:15      0         
11.19-5.21_15_min 12/5/2019  23:30      0         
11.19-5.21_15_min 12/5/2019  23:45      0         
11.19-5.21_15_min 12/6/2019  0:00       0         
11.19-5.21_15_min 12/6/2019  0:15       0         
11.19-5.21_15_min 12/6/2019  0:30       0         
11.19-5.21_15_min 12/6/2019  0:45       0         
11.19-5.21_15_min 12/6/2019  1:00       0         
11.19-5.21_15_min 12/6/2019  1:15       0         
11.19-5.21_15_min 12/6/2019  1:30       0         
11.19-5.21_15_min 12/6/2019  1:45       0         
11.19-5.21_15_min 12/6/2019  2:00       0         
11.19-5.21_15_min 12/6/2019  2:15       0         
11.19-5.21_15_min 12/6/2019  2:30       0         
11.19-5.21_15_min 12/6/2019  2:45       0         
11.19-5.21_15_min 12/6/2019  3:00       0         
11.19-5.21_15_min 12/6/2019  3:15       0         
11.19-5.21_15_min 12/6/2019  3:30       0         
11.19-5.21_15_min 12/6/2019  3:45       0         
11.19-5.21_15_min 12/6/2019  4:00       0         
11.19-5.21_15_min 12/6/2019  4:15       0         
11.19-5.21_15_min 12/6/2019  4:30       0         
11.19-5.21_15_min 12/6/2019  4:45       0         
11.19-5.21_15_min 12/6/2019  5:00       0         
11.19-5.21_15_min 12/6/2019  5:15       0         
11.19-5.21_15_min 12/6/2019  5:30       0         
11.19-5.21_15_min 12/6/2019  5:45       0         
11.19-5.21_15_min 12/6/2019  6:00       0         
11.19-5.21_15_min 12/6/2019  6:15       0         
11.19-5.21_15_min 12/6/2019  6:30       0         
11.19-5.21_15_min 12/6/2019  6:45       0         
11.19-5.21_15_min 12/6/2019  7:00       0         
11.19-5.21_15_min 12/6/2019  7:15       0         
11.19-5.21_15_min 12/6/2019  7:30       0         
11.19-5.21_15_min 12/6/2019  7:45       0         
11.19-5.21_15_min 12/6/2019  8:00       0         
11.19-5.21_15_min 12/6/2019  8:15       0         
11.19-5.21_15_min 12/6/2019  8:30       0         
11.19-5.21_15_min 12/6/2019  8:45       0         
11.19-5.21_15_min 12/6/2019  9:00       0         
11.19-5.21_15_min 12/6/2019  9:15       0         
11.19-5.21_15_min 12/6/2019  9:30       0         
11.19-5.21_15_min 12/6/2019  9:45       0         
11.19-5.21_15_min 12/6/2019  10:00      0         
11.19-5.21_15_min 12/6/2019  10:15      0         
11.19-5.21_15_min 12/6/2019  10:30      0         
11.19-5.21_15_min 12/6/2019  10:45      0         
11.19-5.21_15_min 12/6/2019  11:00      0         
11.19-5.21_15_min 12/6/2019  11:15      0         
11.19-5.21_15_min 12/6/2019  11:30      0         
11.19-5.21_15_min 12/6/2019  11:45      0         
11.19-5.21_15_min 12/6/2019  12:00      0         
11.19-5.21_15_min 12/6/2019  12:15      0         
11.19-5.21_15_min 12/6/2019  12:30      0         
11.19-5.21_15_min 12/6/2019  12:45      0         
11.19-5.21_15_min 12/6/2019  13:00      0         
11.19-5.21_15_min 12/6/2019  13:15      0         
11.19-5.21_15_min 12/6/2019  13:30      0         
11.19-5.21_15_min 12/6/2019  13:45      0         
11.19-5.21_15_min 12/6/2019  14:00      0         
11.19-5.21_15_min 12/6/2019  14:15      0         
11.19-5.21_15_min 12/6/2019  14:30      0         
11.19-5.21_15_min 12/6/2019  14:45      0         
11.19-5.21_15_min 12/6/2019  15:00      0         
11.19-5.21_15_min 12/6/2019  15:15      0         
11.19-5.21_15_min 12/6/2019  15:30      0         
11.19-5.21_15_min 12/6/2019  15:45      0         
11.19-5.21_15_min 12/6/2019  16:00      0         
11.19-5.21_15_min 12/6/2019  16:15      0         
11.19-5.21_15_min 12/6/2019  16:30      0         
11.19-5.21_15_min 12/6/2019  16:45      0         
11.19-5.21_15_min 12/6/2019  17:00      0         
11.19-5.21_15_min 12/6/2019  17:15      0         
11.19-5.21_15_min 12/6/2019  17:30      0         
11.19-5.21_15_min 12/6/2019  17:45      0         
11.19-5.21_15_min 12/6/2019  18:00      0         
11.19-5.21_15_min 12/6/2019  18:15      0         
11.19-5.21_15_min 12/6/2019  18:30      0         
11.19-5.21_15_min 12/6/2019  18:45      0         
11.19-5.21_15_min 12/6/2019  19:00      0         
11.19-5.21_15_min 12/6/2019  19:15      0         
11.19-5.21_15_min 12/6/2019  19:30      0         
11.19-5.21_15_min 12/6/2019  19:45      0         
11.19-5.21_15_min 12/6/2019  20:00      0         
11.19-5.21_15_min 12/6/2019  20:15      0         
11.19-5.21_15_min 12/6/2019  20:30      0         
11.19-5.21_15_min 12/6/2019  20:45      0         
11.19-5.21_15_min 12/6/2019  21:00      0         
11.19-5.21_15_min 12/6/2019  21:15      0         
11.19-5.21_15_min 12/6/2019  21:30      0         
11.19-5.21_15_min 12/6/2019  21:45      0         
11.19-5.21_15_min 12/6/2019  22:00      0         
11.19-5.21_15_min 12/6/2019  22:15      0         
11.19-5.21_15_min 12/6/2019  22:30      0         
11.19-5.21_15_min 12/6/2019  22:45      0         
11.19-5.21_15_min 12/6/2019  23:00      0         
11.19-5.21_15_min 12/6/2019  23:15      0         
11.19-5.21_15_min 12/6/2019  23:30      0         
11.19-5.21_15_min 12/6/2019  23:45      0         
11.19-5.21_15_min 12/7/2019  0:00       0         
11.19-5.21_15_min 12/7/2019  0:15       0         
11.19-5.21_15_min 12/7/2019  0:30       0         
11.19-5.21_15_min 12/7/2019  0:45       0         
11.19-5.21_15_min 12/7/2019  1:00       0         
11.19-5.21_15_min 12/7/2019  1:15       0         
11.19-5.21_15_min 12/7/2019  1:30       0         
11.19-5.21_15_min 12/7/2019  1:45       0         
11.19-5.21_15_min 12/7/2019  2:00       0         
11.19-5.21_15_min 12/7/2019  2:15       0         
11.19-5.21_15_min 12/7/2019  2:30       0         
11.19-5.21_15_min 12/7/2019  2:45       0         
11.19-5.21_15_min 12/7/2019  3:00       0         
11.19-5.21_15_min 12/7/2019  3:15       0         
11.19-5.21_15_min 12/7/2019  3:30       0         
11.19-5.21_15_min 12/7/2019  3:45       0         
11.19-5.21_15_min 12/7/2019  4:00       0         
11.19-5.21_15_min 12/7/2019  4:15       0         
11.19-5.21_15_min 12/7/2019  4:30       0         
11.19-5.21_15_min 12/7/2019  4:45       0         
11.19-5.21_15_min 12/7/2019  5:00       0         
11.19-5.21_15_min 12/7/2019  5:15       0         
11.19-5.21_15_min 12/7/2019  5:30       0         
11.19-5.21_15_min 12/7/2019  5:45       0         
11.19-5.21_15_min 12/7/2019  6:00       0         
11.19-5.21_15_min 12/7/2019  6:15       0         
11.19-5.21_15_min 12/7/2019  6:30       0         
11.19-5.21_15_min 12/7/2019  6:45       0         
11.19-5.21_15_min 12/7/2019  7:00       0         
11.19-5.21_15_min 12/7/2019  7:15       0         
11.19-5.21_15_min 12/7/2019  7:30       0         
11.19-5.21_15_min 12/7/2019  7:45       0         
11.19-5.21_15_min 12/7/2019  8:00       0         
11.19-5.21_15_min 12/7/2019  8:15       0         
11.19-5.21_15_min 12/7/2019  8:30       0         
11.19-5.21_15_min 12/7/2019  8:45       0         
11.19-5.21_15_min 12/7/2019  9:00       0         
11.19-5.21_15_min 12/7/2019  9:15       0         
11.19-5.21_15_min 12/7/2019  9:30       0         
11.19-5.21_15_min 12/7/2019  9:45       0         
11.19-5.21_15_min 12/7/2019  10:00      0         
11.19-5.21_15_min 12/7/2019  10:15      0         
11.19-5.21_15_min 12/7/2019  10:30      0         
11.19-5.21_15_min 12/7/2019  10:45      0         
11.19-5.21_15_min 12/7/2019  11:00      0         
11.19-5.21_15_min 12/7/2019  11:15      0         
11.19-5.21_15_min 12/7/2019  11:30      0         
11.19-5.21_15_min 12/7/2019  11:45      0         
11.19-5.21_15_min 12/7/2019  12:00      0         
11.19-5.21_15_min 12/7/2019  12:15      0         
11.19-5.21_15_min 12/7/2019  12:30      0         
11.19-5.21_15_min 12/7/2019  12:45      0         
11.19-5.21_15_min 12/7/2019  13:00      0         
11.19-5.21_15_min 12/7/2019  13:15      0         
11.19-5.21_15_min 12/7/2019  13:30      0         
11.19-5.21_15_min 12/7/2019  13:45      0         
11.19-5.21_15_min 12/7/2019  14:00      0         
11.19-5.21_15_min 12/7/2019  14:15      0         
11.19-5.21_15_min 12/7/2019  14:30      0         
11.19-5.21_15_min 12/7/2019  14:45      0         
11.19-5.21_15_min 12/7/2019  15:00      0         
11.19-5.21_15_min 12/7/2019  15:15      0         
11.19-5.21_15_min 12/7/2019  15:30      0         
11.19-5.21_15_min 12/7/2019  15:45      0         
11.19-5.21_15_min 12/7/2019  16:00      0         
11.19-5.21_15_min 12/7/2019  16:15      0         
11.19-5.21_15_min 12/7/2019  16:30      0         
11.19-5.21_15_min 12/7/2019  16:45      0         
11.19-5.21_15_min 12/7/2019  17:00      0         
11.19-5.21_15_min 12/7/2019  17:15      0         
11.19-5.21_15_min 12/7/2019  17:30      0         
11.19-5.21_15_min 12/7/2019  17:45      0         
11.19-5.21_15_min 12/7/2019  18:00      0         
11.19-5.21_15_min 12/7/2019  18:15      0         
11.19-5.21_15_min 12/7/2019  18:30      0         
11.19-5.21_15_min 12/7/2019  18:45      0         
11.19-5.21_15_min 12/7/2019  19:00      0         
11.19-5.21_15_min 12/7/2019  19:15      0         
11.19-5.21_15_min 12/7/2019  19:30      0         
11.19-5.21_15_min 12/7/2019  19:45      0         
11.19-5.21_15_min 12/7/2019  20:00      0         
11.19-5.21_15_min 12/7/2019  20:15      0         
11.19-5.21_15_min 12/7/2019  20:30      0         
11.19-5.21_15_min 12/7/2019  20:45      0         
11.19-5.21_15_min 12/7/2019  21:00      0         
11.19-5.21_15_min 12/7/2019  21:15      0         
11.19-5.21_15_min 12/7/2019  21:30      0         
11.19-5.21_15_min 12/7/2019  21:45      0         
11.19-5.21_15_min 12/7/2019  22:00      0         
11.19-5.21_15_min 12/7/2019  22:15      0         
11.19-5.21_15_min 12/7/2019  22:30      0         
11.19-5.21_15_min 12/7/2019  22:45      0         
11.19-5.21_15_min 12/7/2019  23:00      0         
11.19-5.21_15_min 12/7/2019  23:15      0         
11.19-5.21_15_min 12/7/2019  23:30      0         
11.19-5.21_15_min 12/7/2019  23:45      0         
11.19-5.21_15_min 12/8/2019  0:00       0         
11.19-5.21_15_min 12/8/2019  0:15       0         
11.19-5.21_15_min 12/8/2019  0:30       0         
11.19-5.21_15_min 12/8/2019  0:45       0         
11.19-5.21_15_min 12/8/2019  1:00       0         
11.19-5.21_15_min 12/8/2019  1:15       0         
11.19-5.21_15_min 12/8/2019  1:30       0         
11.19-5.21_15_min 12/8/2019  1:45       0         
11.19-5.21_15_min 12/8/2019  2:00       0         
11.19-5.21_15_min 12/8/2019  2:15       0         
11.19-5.21_15_min 12/8/2019  2:30       0         
11.19-5.21_15_min 12/8/2019  2:45       0         
11.19-5.21_15_min 12/8/2019  3:00       0         
11.19-5.21_15_min 12/8/2019  3:15       0         
11.19-5.21_15_min 12/8/2019  3:30       0         
11.19-5.21_15_min 12/8/2019  3:45       0         
11.19-5.21_15_min 12/8/2019  4:00       0         
11.19-5.21_15_min 12/8/2019  4:15       0         
11.19-5.21_15_min 12/8/2019  4:30       0         
11.19-5.21_15_min 12/8/2019  4:45       0         
11.19-5.21_15_min 12/8/2019  5:00       0         
11.19-5.21_15_min 12/8/2019  5:15       0         
11.19-5.21_15_min 12/8/2019  5:30       0         
11.19-5.21_15_min 12/8/2019  5:45       0         
11.19-5.21_15_min 12/8/2019  6:00       0         
11.19-5.21_15_min 12/8/2019  6:15       0         
11.19-5.21_15_min 12/8/2019  6:30       0         
11.19-5.21_15_min 12/8/2019  6:45       0         
11.19-5.21_15_min 12/8/2019  7:00       0         
11.19-5.21_15_min 12/8/2019  7:15       0         
11.19-5.21_15_min 12/8/2019  7:30       0         
11.19-5.21_15_min 12/8/2019  7:45       0         
11.19-5.21_15_min 12/8/2019  8:00       0         
11.19-5.21_15_min 12/8/2019  8:15       0         
11.19-5.21_15_min 12/8/2019  8:30       0         
11.19-5.21_15_min 12/8/2019  8:45       0         
11.19-5.21_15_min 12/8/2019  9:00       0         
11.19-5.21_15_min 12/8/2019  9:15       0         
11.19-5.21_15_min 12/8/2019  9:30       0         
11.19-5.21_15_min 12/8/2019  9:45       0         
11.19-5.21_15_min 12/8/2019  10:00      0         
11.19-5.21_15_min 12/8/2019  10:15      0         
11.19-5.21_15_min 12/8/2019  10:30      0         
11.19-5.21_15_min 12/8/2019  10:45      0         
11.19-5.21_15_min 12/8/2019  11:00      0         
11.19-5.21_15_min 12/8/2019  11:15      0         
11.19-5.21_15_min 12/8/2019  11:30      0         
11.19-5.21_15_min 12/8/2019  11:45      0         
11.19-5.21_15_min 12/8/2019  12:00      0         
11.19-5.21_15_min 12/8/2019  12:15      0         
11.19-5.21_15_min 12/8/2019  12:30      0         
11.19-5.21_15_min 12/8/2019  12:45      0         
11.19-5.21_15_min 12/8/2019  13:00      0         
11.19-5.21_15_min 12/8/2019  13:15      0         
11.19-5.21_15_min 12/8/2019  13:30      0         
11.19-5.21_15_min 12/8/2019  13:45      0         
11.19-5.21_15_min 12/8/2019  14:00      0         
11.19-5.21_15_min 12/8/2019  14:15      0         
11.19-5.21_15_min 12/8/2019  14:30      0         
11.19-5.21_15_min 12/8/2019  14:45      0         
11.19-5.21_15_min 12/8/2019  15:00      0         
11.19-5.21_15_min 12/8/2019  15:15      0         
11.19-5.21_15_min 12/8/2019  15:30      0         
11.19-5.21_15_min 12/8/2019  15:45      0         
11.19-5.21_15_min 12/8/2019  16:00      0         
11.19-5.21_15_min 12/8/2019  16:15      0         
11.19-5.21_15_min 12/8/2019  16:30      0         
11.19-5.21_15_min 12/8/2019  16:45      0         
11.19-5.21_15_min 12/8/2019  17:00      0         
11.19-5.21_15_min 12/8/2019  17:15      0         
11.19-5.21_15_min 12/8/2019  17:30      0         
11.19-5.21_15_min 12/8/2019  17:45      0         
11.19-5.21_15_min 12/8/2019  18:00      0         
11.19-5.21_15_min 12/8/2019  18:15      0         
11.19-5.21_15_min 12/8/2019  18:30      0         
11.19-5.21_15_min 12/8/2019  18:45      0         
11.19-5.21_15_min 12/8/2019  19:00      0         
11.19-5.21_15_min 12/8/2019  19:15      0         
11.19-5.21_15_min 12/8/2019  19:30      0         
11.19-5.21_15_min 12/8/2019  19:45      0         
11.19-5.21_15_min 12/8/2019  20:00      0         
11.19-5.21_15_min 12/8/2019  20:15      0         
11.19-5.21_15_min 12/8/2019  20:30      0         
11.19-5.21_15_min 12/8/2019  20:45      0         
11.19-5.21_15_min 12/8/2019  21:00      0         
11.19-5.21_15_min 12/8/2019  21:15      0         
11.19-5.21_15_min 12/8/2019  21:30      0         
11.19-5.21_15_min 12/8/2019  21:45      0         
11.19-5.21_15_min 12/8/2019  22:00      0         
11.19-5.21_15_min 12/8/2019  22:15      0         
11.19-5.21_15_min 12/8/2019  22:30      0         
11.19-5.21_15_min 12/8/2019  22:45      0         
11.19-5.21_15_min 12/8/2019  23:00      0         
11.19-5.21_15_min 12/8/2019  23:15      0         
11.19-5.21_15_min 12/8/2019  23:30      0         
11.19-5.21_15_min 12/8/2019  23:45      0         
11.19-5.21_15_min 12/9/2019  0:00       0         
11.19-5.21_15_min 12/9/2019  0:15       0         
11.19-5.21_15_min 12/9/2019  0:30       0         
11.19-5.21_15_min 12/9/2019  0:45       0         
11.19-5.21_15_min 12/9/2019  1:00       0         
11.19-5.21_15_min 12/9/2019  1:15       0         
11.19-5.21_15_min 12/9/2019  1:30       0         
11.19-5.21_15_min 12/9/2019  1:45       0         
11.19-5.21_15_min 12/9/2019  2:00       0         
11.19-5.21_15_min 12/9/2019  2:15       0         
11.19-5.21_15_min 12/9/2019  2:30       0         
11.19-5.21_15_min 12/9/2019  2:45       0         
11.19-5.21_15_min 12/9/2019  3:00       0         
11.19-5.21_15_min 12/9/2019  3:15       0         
11.19-5.21_15_min 12/9/2019  3:30       0         
11.19-5.21_15_min 12/9/2019  3:45       0         
11.19-5.21_15_min 12/9/2019  4:00       0         
11.19-5.21_15_min 12/9/2019  4:15       0.01      
11.19-5.21_15_min 12/9/2019  4:30       0         
11.19-5.21_15_min 12/9/2019  4:45       0         
11.19-5.21_15_min 12/9/2019  5:00       0.01      
11.19-5.21_15_min 12/9/2019  5:15       0         
11.19-5.21_15_min 12/9/2019  5:30       0         
11.19-5.21_15_min 12/9/2019  5:45       0.01      
11.19-5.21_15_min 12/9/2019  6:00       0         
11.19-5.21_15_min 12/9/2019  6:15       0.01      
11.19-5.21_15_min 12/9/2019  6:30       0.01      
11.19-5.21_15_min 12/9/2019  6:45       0.01      
11.19-5.21_15_min 12/9/2019  7:15       0.01      
11.19-5.21_15_min 12/9/2019  7:30       0         
11.19-5.21_15_min 12/9/2019  7:45       0         
11.19-5.21_15_min 12/9/2019  8:00       0.02      
11.19-5.21_15_min 12/9/2019  8:15       0.01      
11.19-5.21_15_min 12/9/2019  8:30       0.02      
11.19-5.21_15_min 12/9/2019  8:45       0.02      
11.19-5.21_15_min 12/9/2019  9:00       0.04      
11.19-5.21_15_min 12/9/2019  9:15       0.04      
11.19-5.21_15_min 12/9/2019  9:30       0.07      
11.19-5.21_15_min 12/9/2019  9:45       0.05      
11.19-5.21_15_min 12/9/2019  10:00      0.03      
11.19-5.21_15_min 12/9/2019  10:15      0.02      
11.19-5.21_15_min 12/9/2019  10:30      0.06      
11.19-5.21_15_min 12/9/2019  10:45      0.13      
11.19-5.21_15_min 12/9/2019  11:00      0.05      
11.19-5.21_15_min 12/9/2019  11:15      0.05      
11.19-5.21_15_min 12/9/2019  11:30      0.03      
11.19-5.21_15_min 12/9/2019  11:45      0.07      
11.19-5.21_15_min 12/9/2019  12:00      0.06      
11.19-5.21_15_min 12/9/2019  12:15      0.04      
11.19-5.21_15_min 12/9/2019  12:30      0.03      
11.19-5.21_15_min 12/9/2019  12:45      0.03      
11.19-5.21_15_min 12/9/2019  13:00      0.03      
11.19-5.21_15_min 12/9/2019  13:15      0.06      
11.19-5.21_15_min 12/9/2019  13:30      0.03      
11.19-5.21_15_min 12/9/2019  13:45      0.06      
11.19-5.21_15_min 12/9/2019  14:00      0.06      
11.19-5.21_15_min 12/9/2019  14:15      0.03      
11.19-5.21_15_min 12/9/2019  14:30      0.02      
11.19-5.21_15_min 12/9/2019  14:45      0.03      
11.19-5.21_15_min 12/9/2019  15:00      0.02      
11.19-5.21_15_min 12/9/2019  15:15      0.01      
11.19-5.21_15_min 12/9/2019  15:30      0.02      
11.19-5.21_15_min 12/9/2019  15:45      0         
11.19-5.21_15_min 12/9/2019  16:00      0.01      
11.19-5.21_15_min 12/9/2019  16:15      0         
11.19-5.21_15_min 12/9/2019  17:15      0         
11.19-5.21_15_min 12/9/2019  17:30      0.01      
11.19-5.21_15_min 12/9/2019  17:45      0.01      
11.19-5.21_15_min 12/9/2019  18:00      0.01      
11.19-5.21_15_min 12/9/2019  18:15      0.01      
11.19-5.21_15_min 12/9/2019  18:45      0         
11.19-5.21_15_min 12/9/2019  19:00      0         
11.19-5.21_15_min 12/9/2019  19:15      0.01      
11.19-5.21_15_min 12/9/2019  19:30      0.03      
11.19-5.21_15_min 12/9/2019  19:45      0         
11.19-5.21_15_min 12/9/2019  20:00      0.02      
11.19-5.21_15_min 12/9/2019  20:15      0         
11.19-5.21_15_min 12/9/2019  20:30      0.01      
11.19-5.21_15_min 12/9/2019  20:45      0.01      
11.19-5.21_15_min 12/9/2019  21:00      0.05      
11.19-5.21_15_min 12/9/2019  21:15      0.04      
11.19-5.21_15_min 12/9/2019  21:30      0.05      
11.19-5.21_15_min 12/9/2019  21:45      0.04      
11.19-5.21_15_min 12/9/2019  22:00      0.01      
11.19-5.21_15_min 12/9/2019  22:15      0         
11.19-5.21_15_min 12/9/2019  22:30      0         
11.19-5.21_15_min 12/9/2019  22:45      0         
11.19-5.21_15_min 12/9/2019  23:00      0         
11.19-5.21_15_min 12/9/2019  23:15      0.02      
11.19-5.21_15_min 12/10/2019 0:15       0         
11.19-5.21_15_min 12/10/2019 0:30       0         
11.19-5.21_15_min 12/10/2019 0:45       0.03      
11.19-5.21_15_min 12/10/2019 1:00       0.02      
11.19-5.21_15_min 12/10/2019 1:15       0.03      
11.19-5.21_15_min 12/10/2019 1:30       0.01      
11.19-5.21_15_min 12/10/2019 1:45       0         
11.19-5.21_15_min 12/10/2019 2:00       0         
11.19-5.21_15_min 12/10/2019 2:30       0         
11.19-5.21_15_min 12/10/2019 2:45       0         
11.19-5.21_15_min 12/10/2019 3:00       0         
11.19-5.21_15_min 12/10/2019 3:15       0         
11.19-5.21_15_min 12/10/2019 3:30       0         
11.19-5.21_15_min 12/10/2019 3:45       0         
11.19-5.21_15_min 12/10/2019 4:00       0         
11.19-5.21_15_min 12/10/2019 4:15       0         
11.19-5.21_15_min 12/10/2019 4:30       0         
11.19-5.21_15_min 12/10/2019 4:45       0         
11.19-5.21_15_min 12/10/2019 5:00       0         
11.19-5.21_15_min 12/10/2019 5:15       0         
11.19-5.21_15_min 12/10/2019 7:45       0         
11.19-5.21_15_min 12/10/2019 8:00       0         
11.19-5.21_15_min 12/10/2019 8:15       0         
11.19-5.21_15_min 12/10/2019 8:30       0         
11.19-5.21_15_min 12/10/2019 8:45       0         
11.19-5.21_15_min 12/10/2019 9:00       0         
11.19-5.21_15_min 12/10/2019 9:15       0         
11.19-5.21_15_min 12/10/2019 9:30       0         
11.19-5.21_15_min 12/10/2019 9:45       0         
11.19-5.21_15_min 12/10/2019 10:00      0         
11.19-5.21_15_min 12/10/2019 10:15      0         
11.19-5.21_15_min 12/10/2019 10:30      0         
11.19-5.21_15_min 12/10/2019 10:45      0         
11.19-5.21_15_min 12/10/2019 11:00      0         
11.19-5.21_15_min 12/10/2019 11:15      0         
11.19-5.21_15_min 12/10/2019 11:30      0         
11.19-5.21_15_min 12/10/2019 11:45      0         
11.19-5.21_15_min 12/10/2019 12:00      0         
11.19-5.21_15_min 12/10/2019 12:15      0         
11.19-5.21_15_min 12/10/2019 12:30      0         
11.19-5.21_15_min 12/10/2019 12:45      0         
11.19-5.21_15_min 12/10/2019 13:00      0         
11.19-5.21_15_min 12/10/2019 13:15      0         
11.19-5.21_15_min 12/10/2019 13:30      0.01      
11.19-5.21_15_min 12/10/2019 13:45      0.01      
11.19-5.21_15_min 12/10/2019 14:00      0.04      
11.19-5.21_15_min 12/10/2019 14:15      0.04      
11.19-5.21_15_min 12/10/2019 14:30      0.03      
11.19-5.21_15_min 12/10/2019 18:15      0.01      
11.19-5.21_15_min 12/10/2019 18:30      0         
11.19-5.21_15_min 12/10/2019 18:45      0.01      
11.19-5.21_15_min 12/10/2019 19:00      0.01      
11.19-5.21_15_min 12/10/2019 19:15      0         
11.19-5.21_15_min 12/11/2019 1:30       0         
11.19-5.21_15_min 12/11/2019 1:45       0         
11.19-5.21_15_min 12/11/2019 2:00       0.01      
11.19-5.21_15_min 12/11/2019 2:15       0.01      
11.19-5.21_15_min 12/11/2019 2:30       0         
11.19-5.21_15_min 12/11/2019 2:45       0.01      
11.19-5.21_15_min 12/11/2019 3:00       0         
11.19-5.21_15_min 12/11/2019 3:15       0.01      
11.19-5.21_15_min 12/11/2019 3:30       0.02      
11.19-5.21_15_min 12/11/2019 3:45       0.01      
11.19-5.21_15_min 12/11/2019 4:00       0         
11.19-5.21_15_min 12/11/2019 4:15       0         
11.19-5.21_15_min 12/11/2019 4:30       0         
11.19-5.21_15_min 12/11/2019 4:45       0         
11.19-5.21_15_min 12/11/2019 5:00       0.01      
11.19-5.21_15_min 12/11/2019 5:15       0.01      
11.19-5.21_15_min 12/11/2019 5:30       0.01      
11.19-5.21_15_min 12/11/2019 5:45       0.01      
11.19-5.21_15_min 12/11/2019 6:00       0.01      
11.19-5.21_15_min 12/11/2019 6:15       0.02      
11.19-5.21_15_min 12/11/2019 6:30       0.02      
11.19-5.21_15_min 12/11/2019 6:45       0         
11.19-5.21_15_min 12/11/2019 7:00       0         
11.19-5.21_15_min 12/11/2019 7:15       0         
11.19-5.21_15_min 12/11/2019 8:15       0         
11.19-5.21_15_min 12/11/2019 8:30       0         
11.19-5.21_15_min 12/11/2019 8:45       0         
11.19-5.21_15_min 12/11/2019 9:00       0         
11.19-5.21_15_min 12/11/2019 9:15       0         
11.19-5.21_15_min 12/11/2019 10:00      0         
11.19-5.21_15_min 12/11/2019 10:15      0         
11.19-5.21_15_min 12/11/2019 10:30      0         
11.19-5.21_15_min 12/11/2019 10:45      0         
11.19-5.21_15_min 12/11/2019 11:00      0         
11.19-5.21_15_min 12/11/2019 11:15      0         
11.19-5.21_15_min 12/11/2019 11:30      0         
11.19-5.21_15_min 12/11/2019 11:45      0         
11.19-5.21_15_min 12/11/2019 12:00      0         
11.19-5.21_15_min 12/11/2019 12:15      0         
11.19-5.21_15_min 12/11/2019 12:30      0         
11.19-5.21_15_min 12/11/2019 12:45      0         
11.19-5.21_15_min 12/11/2019 13:00      0         
11.19-5.21_15_min 12/11/2019 13:15      0         
11.19-5.21_15_min 12/11/2019 13:30      0         
11.19-5.21_15_min 12/11/2019 13:45      0         
11.19-5.21_15_min 12/11/2019 14:00      0         
11.19-5.21_15_min 12/11/2019 20:45      0         
11.19-5.21_15_min 12/11/2019 21:00      0         
11.19-5.21_15_min 12/11/2019 21:30      0         
11.19-5.21_15_min 12/11/2019 21:45      0         
11.19-5.21_15_min 12/11/2019 22:00      0         
11.19-5.21_15_min 12/11/2019 22:15      0         
11.19-5.21_15_min 12/11/2019 22:30      0         
11.19-5.21_15_min 12/11/2019 22:45      0         
11.19-5.21_15_min 12/11/2019 23:00      0         
11.19-5.21_15_min 12/11/2019 23:15      0         
11.19-5.21_15_min 12/11/2019 23:30      0         
11.19-5.21_15_min 12/11/2019 23:45      0         
11.19-5.21_15_min 12/12/2019 0:00       0         
11.19-5.21_15_min 12/12/2019 0:15       0         
11.19-5.21_15_min 12/12/2019 0:30       0         
11.19-5.21_15_min 12/12/2019 0:45       0         
11.19-5.21_15_min 12/12/2019 1:00       0         
11.19-5.21_15_min 12/12/2019 1:15       0         
11.19-5.21_15_min 12/12/2019 1:30       0         
11.19-5.21_15_min 12/12/2019 1:45       0         
11.19-5.21_15_min 12/12/2019 2:00       0         
11.19-5.21_15_min 12/12/2019 2:15       0         
11.19-5.21_15_min 12/12/2019 2:30       0         
11.19-5.21_15_min 12/12/2019 2:45       0         
11.19-5.21_15_min 12/12/2019 3:00       0         
11.19-5.21_15_min 12/12/2019 3:15       0         
11.19-5.21_15_min 12/12/2019 3:30       0         
11.19-5.21_15_min 12/12/2019 3:45       0         
11.19-5.21_15_min 12/12/2019 4:00       0         
11.19-5.21_15_min 12/12/2019 4:15       0         
11.19-5.21_15_min 12/12/2019 4:30       0         
11.19-5.21_15_min 12/12/2019 4:45       0         
11.19-5.21_15_min 12/12/2019 5:00       0         
11.19-5.21_15_min 12/12/2019 5:15       0         
11.19-5.21_15_min 12/12/2019 5:30       0         
11.19-5.21_15_min 12/12/2019 5:45       0         
11.19-5.21_15_min 12/12/2019 6:00       0         
11.19-5.21_15_min 12/12/2019 6:15       0         
11.19-5.21_15_min 12/12/2019 6:30       0         
11.19-5.21_15_min 12/12/2019 6:45       0         
11.19-5.21_15_min 12/12/2019 7:00       0         
11.19-5.21_15_min 12/12/2019 7:15       0         
11.19-5.21_15_min 12/12/2019 7:30       0         
11.19-5.21_15_min 12/12/2019 7:45       0         
11.19-5.21_15_min 12/12/2019 8:00       0         
11.19-5.21_15_min 12/12/2019 8:15       0         
11.19-5.21_15_min 12/12/2019 8:30       0         
11.19-5.21_15_min 12/12/2019 8:45       0         
11.19-5.21_15_min 12/12/2019 9:00       0         
11.19-5.21_15_min 12/12/2019 9:15       0         
11.19-5.21_15_min 12/12/2019 9:30       0         
11.19-5.21_15_min 12/12/2019 9:45       0         
11.19-5.21_15_min 12/12/2019 10:00      0         
11.19-5.21_15_min 12/12/2019 10:15      0         
11.19-5.21_15_min 12/12/2019 10:30      0         
11.19-5.21_15_min 12/12/2019 10:45      0         
11.19-5.21_15_min 12/12/2019 11:00      0         
11.19-5.21_15_min 12/12/2019 11:15      0         
11.19-5.21_15_min 12/12/2019 11:30      0         
11.19-5.21_15_min 12/12/2019 11:45      0         
11.19-5.21_15_min 12/12/2019 12:00      0         
11.19-5.21_15_min 12/12/2019 12:15      0         
11.19-5.21_15_min 12/12/2019 12:30      0         
11.19-5.21_15_min 12/12/2019 12:45      0         
11.19-5.21_15_min 12/12/2019 13:00      0         
11.19-5.21_15_min 12/12/2019 13:15      0         
11.19-5.21_15_min 12/12/2019 13:30      0         
11.19-5.21_15_min 12/12/2019 13:45      0         
11.19-5.21_15_min 12/12/2019 14:00      0         
11.19-5.21_15_min 12/12/2019 20:15      0         
11.19-5.21_15_min 12/12/2019 20:30      0         
11.19-5.21_15_min 12/12/2019 20:45      0         
11.19-5.21_15_min 12/12/2019 21:00      0         
11.19-5.21_15_min 12/12/2019 21:15      0         
11.19-5.21_15_min 12/12/2019 21:30      0         
11.19-5.21_15_min 12/12/2019 21:45      0         
11.19-5.21_15_min 12/12/2019 22:00      0         
11.19-5.21_15_min 12/12/2019 22:15      0         
11.19-5.21_15_min 12/12/2019 22:30      0         
11.19-5.21_15_min 12/12/2019 22:45      0         
11.19-5.21_15_min 12/12/2019 23:00      0         
11.19-5.21_15_min 12/12/2019 23:15      0         
11.19-5.21_15_min 12/12/2019 23:30      0         
11.19-5.21_15_min 12/12/2019 23:45      0         
11.19-5.21_15_min 12/13/2019 0:00       0         
11.19-5.21_15_min 12/13/2019 0:15       0         
11.19-5.21_15_min 12/13/2019 0:30       0         
11.19-5.21_15_min 12/13/2019 0:45       0         
11.19-5.21_15_min 12/13/2019 1:00       0         
11.19-5.21_15_min 12/13/2019 1:15       0         
11.19-5.21_15_min 12/13/2019 1:30       0         
11.19-5.21_15_min 12/13/2019 1:45       0         
11.19-5.21_15_min 12/13/2019 2:00       0         
11.19-5.21_15_min 12/13/2019 2:15       0         
11.19-5.21_15_min 12/13/2019 2:30       0         
11.19-5.21_15_min 12/13/2019 2:45       0         
11.19-5.21_15_min 12/13/2019 3:00       0         
11.19-5.21_15_min 12/13/2019 3:15       0         
11.19-5.21_15_min 12/13/2019 3:30       0         
11.19-5.21_15_min 12/13/2019 3:45       0         
11.19-5.21_15_min 12/13/2019 4:00       0         
11.19-5.21_15_min 12/13/2019 4:15       0         
11.19-5.21_15_min 12/13/2019 4:30       0         
11.19-5.21_15_min 12/13/2019 4:45       0         
11.19-5.21_15_min 12/13/2019 5:00       0         
11.19-5.21_15_min 12/13/2019 5:15       0         
11.19-5.21_15_min 12/13/2019 5:30       0         
11.19-5.21_15_min 12/13/2019 5:45       0         
11.19-5.21_15_min 12/13/2019 6:00       0         
11.19-5.21_15_min 12/13/2019 6:15       0         
11.19-5.21_15_min 12/13/2019 6:30       0         
11.19-5.21_15_min 12/13/2019 6:45       0         
11.19-5.21_15_min 12/13/2019 7:00       0         
11.19-5.21_15_min 12/13/2019 7:15       0         
11.19-5.21_15_min 12/13/2019 7:30       0         
11.19-5.21_15_min 12/13/2019 7:45       0         
11.19-5.21_15_min 12/13/2019 8:00       0         
11.19-5.21_15_min 12/13/2019 8:15       0         
11.19-5.21_15_min 12/13/2019 8:30       0         
11.19-5.21_15_min 12/13/2019 8:45       0         
11.19-5.21_15_min 12/13/2019 9:00       0         
11.19-5.21_15_min 12/13/2019 9:15       0         
11.19-5.21_15_min 12/13/2019 9:30       0         
11.19-5.21_15_min 12/13/2019 9:45       0         
11.19-5.21_15_min 12/13/2019 10:00      0         
11.19-5.21_15_min 12/13/2019 10:15      0         
11.19-5.21_15_min 12/13/2019 10:30      0         
11.19-5.21_15_min 12/13/2019 10:45      0         
11.19-5.21_15_min 12/13/2019 11:00      0         
11.19-5.21_15_min 12/13/2019 11:15      0         
11.19-5.21_15_min 12/13/2019 11:30      0         
11.19-5.21_15_min 12/13/2019 11:45      0         
11.19-5.21_15_min 12/13/2019 12:00      0         
11.19-5.21_15_min 12/13/2019 12:15      0         
11.19-5.21_15_min 12/13/2019 12:30      0         
11.19-5.21_15_min 12/13/2019 12:45      0         
11.19-5.21_15_min 12/13/2019 14:00      0         
11.19-5.21_15_min 12/13/2019 14:15      0         
11.19-5.21_15_min 12/13/2019 14:30      0         
11.19-5.21_15_min 12/13/2019 15:30      0         
11.19-5.21_15_min 12/13/2019 15:45      0         
11.19-5.21_15_min 12/13/2019 16:45      0         
11.19-5.21_15_min 12/13/2019 17:00      0         
11.19-5.21_15_min 12/13/2019 17:15      0.01      
11.19-5.21_15_min 12/13/2019 17:30      0         
11.19-5.21_15_min 12/13/2019 17:45      0         
11.19-5.21_15_min 12/13/2019 18:00      0.01      
11.19-5.21_15_min 12/13/2019 18:15      0.02      
11.19-5.21_15_min 12/13/2019 18:30      0.01      
11.19-5.21_15_min 12/13/2019 18:45      0.01      
11.19-5.21_15_min 12/13/2019 19:00      0.01      
11.19-5.21_15_min 12/13/2019 19:15      0         
11.19-5.21_15_min 12/13/2019 19:30      0         
11.19-5.21_15_min 12/13/2019 19:45      0         
11.19-5.21_15_min 12/13/2019 20:00      0.01      
11.19-5.21_15_min 12/13/2019 20:15      0         
11.19-5.21_15_min 12/13/2019 20:30      0.01      
11.19-5.21_15_min 12/13/2019 20:45      0.01      
11.19-5.21_15_min 12/13/2019 21:00      0.01      
11.19-5.21_15_min 12/13/2019 21:15      0         
11.19-5.21_15_min 12/13/2019 21:30      0         
11.19-5.21_15_min 12/13/2019 21:45      0         
11.19-5.21_15_min 12/13/2019 22:00      0         
11.19-5.21_15_min 12/13/2019 22:15      0.01      
11.19-5.21_15_min 12/13/2019 22:30      0         
11.19-5.21_15_min 12/13/2019 22:45      0.01      
11.19-5.21_15_min 12/13/2019 23:00      0.01      
11.19-5.21_15_min 12/13/2019 23:15      0.02      
11.19-5.21_15_min 12/13/2019 23:30      0.01      
11.19-5.21_15_min 12/13/2019 23:45      0.01      
11.19-5.21_15_min 12/14/2019 0:00       0.03      
11.19-5.21_15_min 12/14/2019 0:15       0.03      
11.19-5.21_15_min 12/14/2019 0:30       0.02      
11.19-5.21_15_min 12/14/2019 0:45       0.03      
11.19-5.21_15_min 12/14/2019 1:00       0.05      
11.19-5.21_15_min 12/14/2019 1:15       0.06      
11.19-5.21_15_min 12/14/2019 1:30       0.07      
11.19-5.21_15_min 12/14/2019 1:45       0.05      
11.19-5.21_15_min 12/14/2019 2:00       0.02      
11.19-5.21_15_min 12/14/2019 2:15       0.05      
11.19-5.21_15_min 12/14/2019 2:30       0.07      
11.19-5.21_15_min 12/14/2019 2:45       0.09      
11.19-5.21_15_min 12/14/2019 3:00       0.13      
11.19-5.21_15_min 12/14/2019 3:15       0.07      
11.19-5.21_15_min 12/14/2019 3:30       0.06      
11.19-5.21_15_min 12/14/2019 3:45       0.09      
11.19-5.21_15_min 12/14/2019 4:00       0.11      
11.19-5.21_15_min 12/14/2019 4:15       0.09      
11.19-5.21_15_min 12/14/2019 4:30       0.08      
11.19-5.21_15_min 12/14/2019 4:45       0.07      
11.19-5.21_15_min 12/14/2019 5:00       0.05      
11.19-5.21_15_min 12/14/2019 5:15       0.06      
11.19-5.21_15_min 12/14/2019 5:30       0.06      
11.19-5.21_15_min 12/14/2019 5:45       0.08      
11.19-5.21_15_min 12/14/2019 6:00       0.06      
11.19-5.21_15_min 12/14/2019 6:15       0.05      
11.19-5.21_15_min 12/14/2019 6:30       0.03      
11.19-5.21_15_min 12/14/2019 6:45       0.05      
11.19-5.21_15_min 12/14/2019 7:00       0.02      
11.19-5.21_15_min 12/14/2019 7:15       0.04      
11.19-5.21_15_min 12/14/2019 7:30       0.04      
11.19-5.21_15_min 12/14/2019 7:45       0.02      
11.19-5.21_15_min 12/14/2019 8:00       0.01      
11.19-5.21_15_min 12/14/2019 8:15       0.02      
11.19-5.21_15_min 12/14/2019 8:30       0         
11.19-5.21_15_min 12/14/2019 8:45       0         
11.19-5.21_15_min 12/14/2019 9:00       0.01      
11.19-5.21_15_min 12/14/2019 9:15       0         
11.19-5.21_15_min 12/14/2019 9:30       0         
11.19-5.21_15_min 12/14/2019 9:45       0         
11.19-5.21_15_min 12/14/2019 10:00      0         
11.19-5.21_15_min 12/14/2019 10:15      0.01      
11.19-5.21_15_min 12/14/2019 10:30      0         
11.19-5.21_15_min 12/14/2019 10:45      0         
11.19-5.21_15_min 12/14/2019 11:00      0         
11.19-5.21_15_min 12/14/2019 11:15      0         
11.19-5.21_15_min 12/14/2019 11:30      0         
11.19-5.21_15_min 12/14/2019 11:45      0         
11.19-5.21_15_min 12/14/2019 12:00      0         
11.19-5.21_15_min 12/14/2019 12:15      0         
11.19-5.21_15_min 12/14/2019 12:30      0         
11.19-5.21_15_min 12/14/2019 12:45      0.01      
11.19-5.21_15_min 12/14/2019 13:00      0         
11.19-5.21_15_min 12/14/2019 13:15      0         
11.19-5.21_15_min 12/14/2019 13:30      0         
11.19-5.21_15_min 12/14/2019 13:45      0         
11.19-5.21_15_min 12/14/2019 14:00      0         
11.19-5.21_15_min 12/14/2019 14:15      0         
11.19-5.21_15_min 12/14/2019 14:30      0         
11.19-5.21_15_min 12/14/2019 14:45      0         
11.19-5.21_15_min 12/14/2019 15:00      0.01      
11.19-5.21_15_min 12/14/2019 15:15      0         
11.19-5.21_15_min 12/14/2019 15:30      0         
11.19-5.21_15_min 12/14/2019 15:45      0         
11.19-5.21_15_min 12/14/2019 16:00      0         
11.19-5.21_15_min 12/14/2019 16:15      0.01      
11.19-5.21_15_min 12/14/2019 16:30      0         
11.19-5.21_15_min 12/14/2019 16:45      0         
11.19-5.21_15_min 12/14/2019 17:00      0         
11.19-5.21_15_min 12/14/2019 17:15      0.01      
11.19-5.21_15_min 12/14/2019 17:30      0         
11.19-5.21_15_min 12/14/2019 17:45      0         
11.19-5.21_15_min 12/14/2019 18:00      0         
11.19-5.21_15_min 12/14/2019 18:15      0         
11.19-5.21_15_min 12/14/2019 18:30      0         
11.19-5.21_15_min 12/14/2019 18:45      0         
11.19-5.21_15_min 12/14/2019 19:00      0.01      
11.19-5.21_15_min 12/14/2019 19:15      0         
11.19-5.21_15_min 12/14/2019 19:30      0         
11.19-5.21_15_min 12/14/2019 19:45      0         
11.19-5.21_15_min 12/14/2019 20:00      0         
11.19-5.21_15_min 12/14/2019 20:15      0         
11.19-5.21_15_min 12/14/2019 20:30      0         
11.19-5.21_15_min 12/14/2019 20:45      0         
11.19-5.21_15_min 12/14/2019 21:00      0         
11.19-5.21_15_min 12/14/2019 21:15      0         
11.19-5.21_15_min 12/14/2019 21:30      0         
11.19-5.21_15_min 12/14/2019 21:45      0         
11.19-5.21_15_min 12/14/2019 22:00      0         
11.19-5.21_15_min 12/14/2019 22:15      0         
11.19-5.21_15_min 12/14/2019 22:30      0         
11.19-5.21_15_min 12/14/2019 22:45      0         
11.19-5.21_15_min 12/14/2019 23:00      0         
11.19-5.21_15_min 12/14/2019 23:15      0         
11.19-5.21_15_min 12/14/2019 23:30      0         
11.19-5.21_15_min 12/14/2019 23:45      0         
11.19-5.21_15_min 12/15/2019 0:00       0         
11.19-5.21_15_min 12/15/2019 0:15       0         
11.19-5.21_15_min 12/15/2019 0:30       0         
11.19-5.21_15_min 12/15/2019 0:45       0         
11.19-5.21_15_min 12/15/2019 1:00       0         
11.19-5.21_15_min 12/15/2019 1:15       0         
11.19-5.21_15_min 12/15/2019 1:30       0         
11.19-5.21_15_min 12/15/2019 1:45       0         
11.19-5.21_15_min 12/15/2019 2:00       0         
11.19-5.21_15_min 12/15/2019 2:15       0         
11.19-5.21_15_min 12/15/2019 2:30       0         
11.19-5.21_15_min 12/15/2019 2:45       0         
11.19-5.21_15_min 12/15/2019 3:00       0         
11.19-5.21_15_min 12/15/2019 3:15       0         
11.19-5.21_15_min 12/15/2019 3:30       0         
11.19-5.21_15_min 12/15/2019 3:45       0         
11.19-5.21_15_min 12/15/2019 4:00       0         
11.19-5.21_15_min 12/15/2019 4:15       0         
11.19-5.21_15_min 12/15/2019 4:30       0         
11.19-5.21_15_min 12/15/2019 4:45       0         
11.19-5.21_15_min 12/15/2019 5:00       0         
11.19-5.21_15_min 12/15/2019 5:15       0         
11.19-5.21_15_min 12/15/2019 5:30       0         
11.19-5.21_15_min 12/15/2019 5:45       0         
11.19-5.21_15_min 12/15/2019 6:00       0         
11.19-5.21_15_min 12/15/2019 6:15       0         
11.19-5.21_15_min 12/15/2019 6:30       0         
11.19-5.21_15_min 12/15/2019 6:45       0         
11.19-5.21_15_min 12/15/2019 7:00       0         
11.19-5.21_15_min 12/15/2019 7:15       0         
11.19-5.21_15_min 12/15/2019 7:30       0         
11.19-5.21_15_min 12/15/2019 7:45       0         
11.19-5.21_15_min 12/15/2019 8:00       0         
11.19-5.21_15_min 12/15/2019 8:15       0         
11.19-5.21_15_min 12/15/2019 8:30       0         
11.19-5.21_15_min 12/15/2019 8:45       0         
11.19-5.21_15_min 12/15/2019 9:00       0         
11.19-5.21_15_min 12/15/2019 9:15       0         
11.19-5.21_15_min 12/15/2019 9:30       0         
11.19-5.21_15_min 12/15/2019 9:45       0         
11.19-5.21_15_min 12/15/2019 10:00      0         
11.19-5.21_15_min 12/15/2019 10:15      0         
11.19-5.21_15_min 12/15/2019 10:30      0         
11.19-5.21_15_min 12/15/2019 10:45      0         
11.19-5.21_15_min 12/15/2019 11:00      0         
11.19-5.21_15_min 12/15/2019 11:15      0.01      
11.19-5.21_15_min 12/15/2019 11:30      0         
11.19-5.21_15_min 12/15/2019 11:45      0         
11.19-5.21_15_min 12/15/2019 12:00      0         
11.19-5.21_15_min 12/15/2019 12:15      0         
11.19-5.21_15_min 12/15/2019 12:30      0         
11.19-5.21_15_min 12/15/2019 12:45      0         
11.19-5.21_15_min 12/15/2019 13:00      0         
11.19-5.21_15_min 12/15/2019 13:15      0         
11.19-5.21_15_min 12/15/2019 13:30      0         
11.19-5.21_15_min 12/15/2019 13:45      0         
11.19-5.21_15_min 12/15/2019 14:00      0         
11.19-5.21_15_min 12/15/2019 14:15      0         
11.19-5.21_15_min 12/15/2019 14:30      0         
11.19-5.21_15_min 12/15/2019 14:45      0         
11.19-5.21_15_min 12/15/2019 15:00      0         
11.19-5.21_15_min 12/15/2019 15:15      0         
11.19-5.21_15_min 12/15/2019 15:30      0         
11.19-5.21_15_min 12/15/2019 15:45      0         
11.19-5.21_15_min 12/15/2019 16:00      0         
11.19-5.21_15_min 12/15/2019 16:15      0         
11.19-5.21_15_min 12/15/2019 16:30      0         
11.19-5.21_15_min 12/15/2019 16:45      0         
11.19-5.21_15_min 12/15/2019 17:00      0         
11.19-5.21_15_min 12/15/2019 17:15      0         
11.19-5.21_15_min 12/15/2019 17:30      0         
11.19-5.21_15_min 12/15/2019 17:45      0         
11.19-5.21_15_min 12/15/2019 18:00      0         
11.19-5.21_15_min 12/15/2019 18:15      0         
11.19-5.21_15_min 12/15/2019 18:30      0         
11.19-5.21_15_min 12/15/2019 18:45      0         
11.19-5.21_15_min 12/15/2019 19:00      0         
11.19-5.21_15_min 12/15/2019 19:15      0         
11.19-5.21_15_min 12/15/2019 19:30      0         
11.19-5.21_15_min 12/15/2019 19:45      0         
11.19-5.21_15_min 12/15/2019 20:00      0         
11.19-5.21_15_min 12/15/2019 20:15      0         
11.19-5.21_15_min 12/15/2019 20:30      0         
11.19-5.21_15_min 12/15/2019 20:45      0         
11.19-5.21_15_min 12/15/2019 21:00      0         
11.19-5.21_15_min 12/15/2019 21:15      0         
11.19-5.21_15_min 12/15/2019 21:30      0         
11.19-5.21_15_min 12/15/2019 21:45      0         
11.19-5.21_15_min 12/15/2019 22:00      0         
11.19-5.21_15_min 12/15/2019 22:15      0         
11.19-5.21_15_min 12/15/2019 22:30      0         
11.19-5.21_15_min 12/15/2019 22:45      0         
11.19-5.21_15_min 12/15/2019 23:00      0         
11.19-5.21_15_min 12/15/2019 23:15      0         
11.19-5.21_15_min 12/15/2019 23:30      0         
11.19-5.21_15_min 12/15/2019 23:45      0         
11.19-5.21_15_min 12/16/2019 0:00       0         
11.19-5.21_15_min 12/16/2019 0:15       0         
11.19-5.21_15_min 12/16/2019 0:30       0         
11.19-5.21_15_min 12/16/2019 0:45       0         
11.19-5.21_15_min 12/16/2019 1:00       0         
11.19-5.21_15_min 12/16/2019 1:15       0         
11.19-5.21_15_min 12/16/2019 1:30       0         
11.19-5.21_15_min 12/16/2019 1:45       0         
11.19-5.21_15_min 12/16/2019 2:00       0         
11.19-5.21_15_min 12/16/2019 2:15       0         
11.19-5.21_15_min 12/16/2019 2:30       0         
11.19-5.21_15_min 12/16/2019 2:45       0         
11.19-5.21_15_min 12/16/2019 3:00       0         
11.19-5.21_15_min 12/16/2019 3:15       0         
11.19-5.21_15_min 12/16/2019 3:30       0         
11.19-5.21_15_min 12/16/2019 3:45       0         
11.19-5.21_15_min 12/16/2019 4:00       0         
11.19-5.21_15_min 12/16/2019 4:15       0         
11.19-5.21_15_min 12/16/2019 4:30       0         
11.19-5.21_15_min 12/16/2019 4:45       0         
11.19-5.21_15_min 12/16/2019 5:00       0         
11.19-5.21_15_min 12/16/2019 5:15       0         
11.19-5.21_15_min 12/16/2019 5:30       0         
11.19-5.21_15_min 12/16/2019 5:45       0         
11.19-5.21_15_min 12/16/2019 6:00       0         
11.19-5.21_15_min 12/16/2019 6:15       0         
11.19-5.21_15_min 12/16/2019 6:30       0         
11.19-5.21_15_min 12/16/2019 6:45       0         
11.19-5.21_15_min 12/16/2019 7:00       0         
11.19-5.21_15_min 12/16/2019 7:15       0         
11.19-5.21_15_min 12/16/2019 7:30       0         
11.19-5.21_15_min 12/16/2019 7:45       0         
11.19-5.21_15_min 12/16/2019 8:00       0         
11.19-5.21_15_min 12/16/2019 8:15       0         
11.19-5.21_15_min 12/16/2019 8:30       0         
11.19-5.21_15_min 12/16/2019 8:45       0         
11.19-5.21_15_min 12/16/2019 9:00       0         
11.19-5.21_15_min 12/16/2019 9:15       0         
11.19-5.21_15_min 12/16/2019 9:30       0         
11.19-5.21_15_min 12/16/2019 9:45       0         
11.19-5.21_15_min 12/16/2019 10:00      0         
11.19-5.21_15_min 12/16/2019 10:15      0         
11.19-5.21_15_min 12/16/2019 10:30      0         
11.19-5.21_15_min 12/16/2019 10:45      0         
11.19-5.21_15_min 12/16/2019 11:00      0         
11.19-5.21_15_min 12/16/2019 11:15      0         
11.19-5.21_15_min 12/16/2019 11:30      0         
11.19-5.21_15_min 12/16/2019 11:45      0         
11.19-5.21_15_min 12/16/2019 12:00      0         
11.19-5.21_15_min 12/16/2019 12:15      0         
11.19-5.21_15_min 12/16/2019 12:30      0         
11.19-5.21_15_min 12/16/2019 12:45      0         
11.19-5.21_15_min 12/16/2019 13:00      0         
11.19-5.21_15_min 12/16/2019 13:15      0         
11.19-5.21_15_min 12/16/2019 13:30      0         
11.19-5.21_15_min 12/16/2019 13:45      0         
11.19-5.21_15_min 12/16/2019 14:00      0         
11.19-5.21_15_min 12/16/2019 14:15      0         
11.19-5.21_15_min 12/16/2019 14:30      0         
11.19-5.21_15_min 12/16/2019 14:45      0         
11.19-5.21_15_min 12/16/2019 15:00      0         
11.19-5.21_15_min 12/16/2019 15:15      0         
11.19-5.21_15_min 12/16/2019 15:30      0         
11.19-5.21_15_min 12/16/2019 15:45      0         
11.19-5.21_15_min 12/16/2019 16:00      0         
11.19-5.21_15_min 12/16/2019 16:15      0         
11.19-5.21_15_min 12/16/2019 16:30      0         
11.19-5.21_15_min 12/16/2019 16:45      0         
11.19-5.21_15_min 12/16/2019 17:00      0         
11.19-5.21_15_min 12/16/2019 17:15      0         
11.19-5.21_15_min 12/16/2019 17:30      0         
11.19-5.21_15_min 12/16/2019 17:45      0         
11.19-5.21_15_min 12/16/2019 18:00      0         
11.19-5.21_15_min 12/16/2019 18:15      0         
11.19-5.21_15_min 12/16/2019 18:30      0         
11.19-5.21_15_min 12/16/2019 18:45      0         
11.19-5.21_15_min 12/16/2019 19:00      0         
11.19-5.21_15_min 12/16/2019 19:15      0         
11.19-5.21_15_min 12/16/2019 19:30      0         
11.19-5.21_15_min 12/16/2019 19:45      0         
11.19-5.21_15_min 12/16/2019 20:00      0         
11.19-5.21_15_min 12/16/2019 20:15      0         
11.19-5.21_15_min 12/16/2019 20:30      0         
11.19-5.21_15_min 12/16/2019 20:45      0         
11.19-5.21_15_min 12/16/2019 21:00      0         
11.19-5.21_15_min 12/16/2019 21:15      0         
11.19-5.21_15_min 12/16/2019 21:30      0         
11.19-5.21_15_min 12/16/2019 21:45      0         
11.19-5.21_15_min 12/16/2019 22:00      0         
11.19-5.21_15_min 12/16/2019 22:15      0         
11.19-5.21_15_min 12/16/2019 22:30      0         
11.19-5.21_15_min 12/16/2019 22:45      0         
11.19-5.21_15_min 12/16/2019 23:00      0         
11.19-5.21_15_min 12/16/2019 23:15      0         
11.19-5.21_15_min 12/16/2019 23:30      0         
11.19-5.21_15_min 12/16/2019 23:45      0         
11.19-5.21_15_min 12/17/2019 0:00       0         
11.19-5.21_15_min 12/17/2019 0:15       0         
11.19-5.21_15_min 12/17/2019 0:30       0         
11.19-5.21_15_min 12/17/2019 0:45       0         
11.19-5.21_15_min 12/17/2019 1:00       0         
11.19-5.21_15_min 12/17/2019 1:15       0         
11.19-5.21_15_min 12/17/2019 1:30       0         
11.19-5.21_15_min 12/17/2019 2:00       0         
11.19-5.21_15_min 12/17/2019 2:15       0         
11.19-5.21_15_min 12/17/2019 2:30       0         
11.19-5.21_15_min 12/17/2019 2:45       0         
11.19-5.21_15_min 12/17/2019 3:00       0         
11.19-5.21_15_min 12/17/2019 3:15       0         
11.19-5.21_15_min 12/17/2019 3:30       0         
11.19-5.21_15_min 12/17/2019 3:45       0         
11.19-5.21_15_min 12/17/2019 4:00       0         
11.19-5.21_15_min 12/17/2019 4:15       0         
11.19-5.21_15_min 12/17/2019 4:30       0         
11.19-5.21_15_min 12/17/2019 4:45       0         
11.19-5.21_15_min 12/17/2019 5:00       0.01      
11.19-5.21_15_min 12/17/2019 5:15       0         
11.19-5.21_15_min 12/17/2019 6:45       0         
11.19-5.21_15_min 12/17/2019 7:00       0         
11.19-5.21_15_min 12/17/2019 7:15       0         
11.19-5.21_15_min 12/17/2019 8:00       0         
11.19-5.21_15_min 12/17/2019 8:15       0.01      
11.19-5.21_15_min 12/17/2019 8:30       0.01      
11.19-5.21_15_min 12/17/2019 8:45       0         
11.19-5.21_15_min 12/17/2019 9:00       0.01      
11.19-5.21_15_min 12/17/2019 9:15       0.03      
11.19-5.21_15_min 12/17/2019 9:30       0         
11.19-5.21_15_min 12/17/2019 9:45       0.01      
11.19-5.21_15_min 12/17/2019 10:00      0.01      
11.19-5.21_15_min 12/17/2019 10:15      0.02      
11.19-5.21_15_min 12/17/2019 10:30      0.02      
11.19-5.21_15_min 12/17/2019 10:45      0.01      
11.19-5.21_15_min 12/17/2019 11:00      0         
11.19-5.21_15_min 12/17/2019 11:15      0.03      
11.19-5.21_15_min 12/17/2019 11:30      0.02      
11.19-5.21_15_min 12/17/2019 11:45      0.03      
11.19-5.21_15_min 12/17/2019 12:00      0.02      
11.19-5.21_15_min 12/17/2019 12:15      0.01      
11.19-5.21_15_min 12/17/2019 12:30      0.01      
11.19-5.21_15_min 12/17/2019 12:45      0         
11.19-5.21_15_min 12/17/2019 13:00      0.01      
11.19-5.21_15_min 12/17/2019 13:15      0         
11.19-5.21_15_min 12/17/2019 13:30      0         
11.19-5.21_15_min 12/17/2019 13:45      0         
11.19-5.21_15_min 12/17/2019 14:00      0         
11.19-5.21_15_min 12/17/2019 14:15      0         
11.19-5.21_15_min 12/17/2019 14:30      0         
11.19-5.21_15_min 12/17/2019 14:45      0         
11.19-5.21_15_min 12/17/2019 15:00      0         
11.19-5.21_15_min 12/17/2019 15:15      0.01      
11.19-5.21_15_min 12/17/2019 15:30      0.03      
11.19-5.21_15_min 12/17/2019 15:45      0.01      
11.19-5.21_15_min 12/17/2019 16:00      0         
11.19-5.21_15_min 12/17/2019 16:15      0         
11.19-5.21_15_min 12/17/2019 16:30      0         
11.19-5.21_15_min 12/17/2019 16:45      0         
11.19-5.21_15_min 12/17/2019 17:00      0         
11.19-5.21_15_min 12/17/2019 17:15      0.01      
11.19-5.21_15_min 12/17/2019 17:30      0         
11.19-5.21_15_min 12/17/2019 17:45      0         
11.19-5.21_15_min 12/17/2019 18:00      0.01      
11.19-5.21_15_min 12/17/2019 18:15      0         
11.19-5.21_15_min 12/17/2019 18:30      0.01      
11.19-5.21_15_min 12/17/2019 18:45      0         
11.19-5.21_15_min 12/17/2019 19:00      0.01      
11.19-5.21_15_min 12/17/2019 19:15      0         
11.19-5.21_15_min 12/17/2019 19:30      0         
11.19-5.21_15_min 12/17/2019 19:45      0         
11.19-5.21_15_min 12/17/2019 20:00      0         
11.19-5.21_15_min 12/17/2019 20:15      0         
11.19-5.21_15_min 12/17/2019 20:30      0         
11.19-5.21_15_min 12/17/2019 20:45      0         
11.19-5.21_15_min 12/17/2019 21:00      0         
11.19-5.21_15_min 12/17/2019 21:15      0         
11.19-5.21_15_min 12/17/2019 21:30      0         
11.19-5.21_15_min 12/17/2019 21:45      0         
11.19-5.21_15_min 12/17/2019 22:00      0         
11.19-5.21_15_min 12/17/2019 22:15      0         
11.19-5.21_15_min 12/17/2019 22:30      0         
11.19-5.21_15_min 12/17/2019 22:45      0         
11.19-5.21_15_min 12/17/2019 23:00      0         
11.19-5.21_15_min 12/17/2019 23:15      0         
11.19-5.21_15_min 12/17/2019 23:30      0         
11.19-5.21_15_min 12/17/2019 23:45      0         
11.19-5.21_15_min 12/18/2019 0:00       0         
11.19-5.21_15_min 12/18/2019 0:15       0         
11.19-5.21_15_min 12/18/2019 0:30       0         
11.19-5.21_15_min 12/18/2019 0:45       0         
11.19-5.21_15_min 12/18/2019 1:00       0         
11.19-5.21_15_min 12/18/2019 1:15       0         
11.19-5.21_15_min 12/18/2019 1:30       0         
11.19-5.21_15_min 12/18/2019 1:45       0         
11.19-5.21_15_min 12/18/2019 2:00       0         
11.19-5.21_15_min 12/18/2019 2:15       0         
11.19-5.21_15_min 12/18/2019 2:30       0         
11.19-5.21_15_min 12/18/2019 2:45       0         
11.19-5.21_15_min 12/18/2019 3:00       0         
11.19-5.21_15_min 12/18/2019 3:15       0         
11.19-5.21_15_min 12/18/2019 3:30       0         
11.19-5.21_15_min 12/18/2019 3:45       0         
11.19-5.21_15_min 12/18/2019 4:00       0         
11.19-5.21_15_min 12/18/2019 4:15       0         
11.19-5.21_15_min 12/18/2019 4:30       0         
11.19-5.21_15_min 12/18/2019 4:45       0         
11.19-5.21_15_min 12/18/2019 5:00       0         
11.19-5.21_15_min 12/18/2019 5:15       0         
11.19-5.21_15_min 12/18/2019 5:30       0         
11.19-5.21_15_min 12/18/2019 5:45       0         
11.19-5.21_15_min 12/18/2019 6:00       0         
11.19-5.21_15_min 12/18/2019 6:15       0         
11.19-5.21_15_min 12/18/2019 6:30       0         
11.19-5.21_15_min 12/18/2019 6:45       0         
11.19-5.21_15_min 12/18/2019 7:00       0         
11.19-5.21_15_min 12/18/2019 7:15       0         
11.19-5.21_15_min 12/18/2019 7:30       0         
11.19-5.21_15_min 12/18/2019 7:45       0         
11.19-5.21_15_min 12/18/2019 8:00       0         
11.19-5.21_15_min 12/18/2019 8:15       0         
11.19-5.21_15_min 12/18/2019 8:30       0         
11.19-5.21_15_min 12/18/2019 8:45       0         
11.19-5.21_15_min 12/18/2019 9:00       0         
11.19-5.21_15_min 12/18/2019 9:15       0         
11.19-5.21_15_min 12/18/2019 9:30       0         
11.19-5.21_15_min 12/18/2019 9:45       0         
11.19-5.21_15_min 12/18/2019 10:00      0         
11.19-5.21_15_min 12/18/2019 10:15      0         
11.19-5.21_15_min 12/18/2019 10:30      0         
11.19-5.21_15_min 12/18/2019 10:45      0         
11.19-5.21_15_min 12/18/2019 11:00      0         
11.19-5.21_15_min 12/18/2019 11:15      0         
11.19-5.21_15_min 12/18/2019 11:30      0         
11.19-5.21_15_min 12/18/2019 11:45      0         
11.19-5.21_15_min 12/18/2019 12:00      0         
11.19-5.21_15_min 12/18/2019 12:15      0         
11.19-5.21_15_min 12/18/2019 12:30      0         
11.19-5.21_15_min 12/18/2019 12:45      0         
11.19-5.21_15_min 12/18/2019 13:00      0         
11.19-5.21_15_min 12/18/2019 13:15      0         
11.19-5.21_15_min 12/18/2019 13:30      0         
11.19-5.21_15_min 12/18/2019 13:45      0         
11.19-5.21_15_min 12/18/2019 14:00      0         
11.19-5.21_15_min 12/18/2019 14:15      0         
11.19-5.21_15_min 12/18/2019 14:30      0         
11.19-5.21_15_min 12/18/2019 14:45      0         
11.19-5.21_15_min 12/18/2019 15:00      0         
11.19-5.21_15_min 12/18/2019 15:15      0         
11.19-5.21_15_min 12/18/2019 15:30      0         
11.19-5.21_15_min 12/18/2019 15:45      0         
11.19-5.21_15_min 12/18/2019 16:00      0         
11.19-5.21_15_min 12/18/2019 16:15      0         
11.19-5.21_15_min 12/18/2019 16:30      0.01      
11.19-5.21_15_min 12/18/2019 16:45      0         
11.19-5.21_15_min 12/18/2019 17:00      0         
11.19-5.21_15_min 12/18/2019 17:15      0         
11.19-5.21_15_min 12/18/2019 17:30      0         
11.19-5.21_15_min 12/18/2019 17:45      0         
11.19-5.21_15_min 12/18/2019 18:00      0         
11.19-5.21_15_min 12/18/2019 18:15      0         
11.19-5.21_15_min 12/18/2019 18:30      0         
11.19-5.21_15_min 12/18/2019 18:45      0         
11.19-5.21_15_min 12/18/2019 19:00      0         
11.19-5.21_15_min 12/18/2019 19:15      0         
11.19-5.21_15_min 12/18/2019 19:30      0         
11.19-5.21_15_min 12/18/2019 19:45      0         
11.19-5.21_15_min 12/18/2019 20:00      0         
11.19-5.21_15_min 12/18/2019 20:15      0         
11.19-5.21_15_min 12/18/2019 20:30      0         
11.19-5.21_15_min 12/18/2019 20:45      0         
11.19-5.21_15_min 12/18/2019 21:00      0         
11.19-5.21_15_min 12/18/2019 21:15      0         
11.19-5.21_15_min 12/18/2019 21:30      0         
11.19-5.21_15_min 12/18/2019 21:45      0         
11.19-5.21_15_min 12/18/2019 22:00      0         
11.19-5.21_15_min 12/18/2019 22:15      0         
11.19-5.21_15_min 12/18/2019 22:30      0         
11.19-5.21_15_min 12/18/2019 22:45      0         
11.19-5.21_15_min 12/18/2019 23:00      0         
11.19-5.21_15_min 12/18/2019 23:15      0         
11.19-5.21_15_min 12/18/2019 23:30      0         
11.19-5.21_15_min 12/18/2019 23:45      0         
11.19-5.21_15_min 12/19/2019 0:00       0         
11.19-5.21_15_min 12/19/2019 0:15       0         
11.19-5.21_15_min 12/19/2019 0:30       0         
11.19-5.21_15_min 12/19/2019 0:45       0         
11.19-5.21_15_min 12/19/2019 1:00       0         
11.19-5.21_15_min 12/19/2019 1:15       0         
11.19-5.21_15_min 12/19/2019 1:30       0         
11.19-5.21_15_min 12/19/2019 1:45       0         
11.19-5.21_15_min 12/19/2019 2:00       0         
11.19-5.21_15_min 12/19/2019 2:15       0         
11.19-5.21_15_min 12/19/2019 2:30       0         
11.19-5.21_15_min 12/19/2019 2:45       0         
11.19-5.21_15_min 12/19/2019 3:00       0         
11.19-5.21_15_min 12/19/2019 3:15       0         
11.19-5.21_15_min 12/19/2019 3:30       0         
11.19-5.21_15_min 12/19/2019 3:45       0         
11.19-5.21_15_min 12/19/2019 4:00       0         
11.19-5.21_15_min 12/19/2019 4:15       0         
11.19-5.21_15_min 12/19/2019 4:30       0         
11.19-5.21_15_min 12/19/2019 4:45       0         
11.19-5.21_15_min 12/19/2019 5:00       0         
11.19-5.21_15_min 12/19/2019 5:15       0         
11.19-5.21_15_min 12/19/2019 5:30       0         
11.19-5.21_15_min 12/19/2019 5:45       0         
11.19-5.21_15_min 12/19/2019 6:00       0         
11.19-5.21_15_min 12/19/2019 6:15       0         
11.19-5.21_15_min 12/19/2019 6:30       0         
11.19-5.21_15_min 12/19/2019 6:45       0         
11.19-5.21_15_min 12/19/2019 7:00       0         
11.19-5.21_15_min 12/19/2019 7:15       0         
11.19-5.21_15_min 12/19/2019 7:30       0         
11.19-5.21_15_min 12/19/2019 7:45       0         
11.19-5.21_15_min 12/19/2019 8:00       0         
11.19-5.21_15_min 12/19/2019 8:15       0         
11.19-5.21_15_min 12/19/2019 8:30       0         
11.19-5.21_15_min 12/19/2019 8:45       0         
11.19-5.21_15_min 12/19/2019 9:00       0         
11.19-5.21_15_min 12/19/2019 9:15       0         
11.19-5.21_15_min 12/19/2019 9:30       0         
11.19-5.21_15_min 12/19/2019 9:45       0         
11.19-5.21_15_min 12/19/2019 10:00      0         
11.19-5.21_15_min 12/19/2019 10:15      0         
11.19-5.21_15_min 12/19/2019 10:30      0         
11.19-5.21_15_min 12/19/2019 10:45      0         
11.19-5.21_15_min 12/19/2019 11:00      0         
11.19-5.21_15_min 12/19/2019 11:15      0         
11.19-5.21_15_min 12/19/2019 11:30      0         
11.19-5.21_15_min 12/19/2019 11:45      0         
11.19-5.21_15_min 12/19/2019 12:00      0         
11.19-5.21_15_min 12/19/2019 12:15      0         
11.19-5.21_15_min 12/19/2019 12:30      0         
11.19-5.21_15_min 12/19/2019 12:45      0         
11.19-5.21_15_min 12/19/2019 13:00      0         
11.19-5.21_15_min 12/19/2019 13:15      0         
11.19-5.21_15_min 12/19/2019 13:30      0         
11.19-5.21_15_min 12/19/2019 13:45      0         
11.19-5.21_15_min 12/19/2019 14:00      0         
11.19-5.21_15_min 12/19/2019 14:15      0         
11.19-5.21_15_min 12/19/2019 14:30      0         
11.19-5.21_15_min 12/19/2019 14:45      0         
11.19-5.21_15_min 12/19/2019 15:00      0         
11.19-5.21_15_min 12/19/2019 15:15      0         
11.19-5.21_15_min 12/19/2019 15:30      0         
11.19-5.21_15_min 12/19/2019 15:45      0         
11.19-5.21_15_min 12/19/2019 16:00      0         
11.19-5.21_15_min 12/19/2019 16:15      0         
11.19-5.21_15_min 12/19/2019 16:30      0         
11.19-5.21_15_min 12/19/2019 16:45      0         
11.19-5.21_15_min 12/19/2019 17:00      0         
11.19-5.21_15_min 12/19/2019 17:15      0         
11.19-5.21_15_min 12/19/2019 17:30      0         
11.19-5.21_15_min 12/19/2019 17:45      0         
11.19-5.21_15_min 12/19/2019 18:00      0         
11.19-5.21_15_min 12/19/2019 18:15      0         
11.19-5.21_15_min 12/19/2019 18:30      0         
11.19-5.21_15_min 12/19/2019 18:45      0         
11.19-5.21_15_min 12/19/2019 19:00      0         
11.19-5.21_15_min 12/19/2019 19:15      0         
11.19-5.21_15_min 12/19/2019 19:30      0         
11.19-5.21_15_min 12/19/2019 19:45      0         
11.19-5.21_15_min 12/19/2019 20:00      0         
11.19-5.21_15_min 12/19/2019 20:15      0         
11.19-5.21_15_min 12/19/2019 20:30      0         
11.19-5.21_15_min 12/19/2019 20:45      0         
11.19-5.21_15_min 12/19/2019 21:00      0         
11.19-5.21_15_min 12/19/2019 21:15      0         
11.19-5.21_15_min 12/19/2019 21:30      0         
11.19-5.21_15_min 12/19/2019 21:45      0         
11.19-5.21_15_min 12/19/2019 22:00      0         
11.19-5.21_15_min 12/19/2019 22:15      0         
11.19-5.21_15_min 12/19/2019 22:30      0         
11.19-5.21_15_min 12/19/2019 22:45      0         
11.19-5.21_15_min 12/19/2019 23:00      0         
11.19-5.21_15_min 12/19/2019 23:15      0         
11.19-5.21_15_min 12/19/2019 23:30      0         
11.19-5.21_15_min 12/19/2019 23:45      0         
11.19-5.21_15_min 12/20/2019 0:00       0         
11.19-5.21_15_min 12/20/2019 0:15       0         
11.19-5.21_15_min 12/20/2019 0:30       0         
11.19-5.21_15_min 12/20/2019 0:45       0         
11.19-5.21_15_min 12/20/2019 1:00       0         
11.19-5.21_15_min 12/20/2019 1:15       0         
11.19-5.21_15_min 12/20/2019 1:30       0         
11.19-5.21_15_min 12/20/2019 1:45       0         
11.19-5.21_15_min 12/20/2019 2:00       0         
11.19-5.21_15_min 12/20/2019 2:15       0         
11.19-5.21_15_min 12/20/2019 2:30       0         
11.19-5.21_15_min 12/20/2019 2:45       0         
11.19-5.21_15_min 12/20/2019 3:00       0         
11.19-5.21_15_min 12/20/2019 3:15       0         
11.19-5.21_15_min 12/20/2019 3:30       0         
11.19-5.21_15_min 12/20/2019 3:45       0         
11.19-5.21_15_min 12/20/2019 4:00       0         
11.19-5.21_15_min 12/20/2019 4:15       0         
11.19-5.21_15_min 12/20/2019 4:30       0         
11.19-5.21_15_min 12/20/2019 4:45       0         
11.19-5.21_15_min 12/20/2019 5:00       0         
11.19-5.21_15_min 12/20/2019 5:15       0         
11.19-5.21_15_min 12/20/2019 5:30       0         
11.19-5.21_15_min 12/20/2019 5:45       0         
11.19-5.21_15_min 12/20/2019 6:00       0         
11.19-5.21_15_min 12/20/2019 6:15       0         
11.19-5.21_15_min 12/20/2019 6:30       0         
11.19-5.21_15_min 12/20/2019 6:45       0         
11.19-5.21_15_min 12/20/2019 7:00       0         
11.19-5.21_15_min 12/20/2019 7:15       0         
11.19-5.21_15_min 12/20/2019 7:30       0         
11.19-5.21_15_min 12/20/2019 7:45       0         
11.19-5.21_15_min 12/20/2019 8:00       0         
11.19-5.21_15_min 12/20/2019 8:15       0         
11.19-5.21_15_min 12/20/2019 8:30       0         
11.19-5.21_15_min 12/20/2019 8:45       0         
11.19-5.21_15_min 12/20/2019 9:00       0         
11.19-5.21_15_min 12/20/2019 9:15       0         
11.19-5.21_15_min 12/20/2019 9:30       0         
11.19-5.21_15_min 12/20/2019 9:45       0         
11.19-5.21_15_min 12/20/2019 10:00      0         
11.19-5.21_15_min 12/20/2019 10:15      0         
11.19-5.21_15_min 12/20/2019 10:30      0         
11.19-5.21_15_min 12/20/2019 10:45      0         
11.19-5.21_15_min 12/20/2019 11:00      0         
11.19-5.21_15_min 12/20/2019 11:15      0         
11.19-5.21_15_min 12/20/2019 11:30      0         
11.19-5.21_15_min 12/20/2019 11:45      0         
11.19-5.21_15_min 12/20/2019 12:15      0         
11.19-5.21_15_min 12/20/2019 13:15      0         
11.19-5.21_15_min 12/20/2019 13:30      0         
11.19-5.21_15_min 12/20/2019 13:45      0         
11.19-5.21_15_min 12/20/2019 14:00      0         
11.19-5.21_15_min 12/20/2019 14:15      0         
11.19-5.21_15_min 12/20/2019 14:30      0         
11.19-5.21_15_min 12/20/2019 14:45      0         
11.19-5.21_15_min 12/21/2019 0:15       0         
11.19-5.21_15_min 12/21/2019 1:45       0         
11.19-5.21_15_min 12/21/2019 2:00       0         
11.19-5.21_15_min 12/21/2019 2:45       0         
11.19-5.21_15_min 12/21/2019 3:00       0         
11.19-5.21_15_min 12/21/2019 3:45       0         
11.19-5.21_15_min 12/21/2019 4:00       0         
11.19-5.21_15_min 12/21/2019 4:15       0         
11.19-5.21_15_min 12/21/2019 5:15       0         
11.19-5.21_15_min 12/21/2019 5:30       0         
11.19-5.21_15_min 12/21/2019 5:45       0         
11.19-5.21_15_min 12/21/2019 6:00       0         
11.19-5.21_15_min 12/21/2019 6:15       0         
11.19-5.21_15_min 12/21/2019 6:30       0         
11.19-5.21_15_min 12/21/2019 6:45       0         
11.19-5.21_15_min 12/21/2019 7:30       0         
11.19-5.21_15_min 12/22/2019 7:45       0         
11.19-5.21_15_min 12/22/2019 8:00       0         
11.19-5.21_15_min 12/22/2019 13:15      0         
11.19-5.21_15_min 12/22/2019 13:30      0         
11.19-5.21_15_min 12/22/2019 13:45      0         
11.19-5.21_15_min 12/22/2019 14:00      0         
11.19-5.21_15_min 12/22/2019 14:15      0         
11.19-5.21_15_min 12/22/2019 14:30      0         
11.19-5.21_15_min 12/22/2019 14:45      0         
11.19-5.21_15_min 12/22/2019 15:00      0         
11.19-5.21_15_min 12/22/2019 15:15      0         
11.19-5.21_15_min 12/22/2019 15:30      0         
11.19-5.21_15_min 12/22/2019 15:45      0         
11.19-5.21_15_min 12/22/2019 16:00      0         
11.19-5.21_15_min 12/22/2019 16:15      0         
11.19-5.21_15_min 12/22/2019 16:30      0         
11.19-5.21_15_min 12/22/2019 16:45      0         
11.19-5.21_15_min 12/22/2019 17:00      0         
11.19-5.21_15_min 12/22/2019 17:15      0         
11.19-5.21_15_min 12/22/2019 17:30      0         
11.19-5.21_15_min 12/22/2019 17:45      0         
11.19-5.21_15_min 12/22/2019 18:00      0         
11.19-5.21_15_min 12/22/2019 18:15      0         
11.19-5.21_15_min 12/22/2019 18:30      0         
11.19-5.21_15_min 12/22/2019 18:45      0         
11.19-5.21_15_min 12/22/2019 19:00      0         
11.19-5.21_15_min 12/22/2019 19:15      0         
11.19-5.21_15_min 12/22/2019 19:30      0         
11.19-5.21_15_min 12/22/2019 19:45      0         
11.19-5.21_15_min 12/22/2019 20:00      0         
11.19-5.21_15_min 12/22/2019 20:15      0         
11.19-5.21_15_min 12/22/2019 20:30      0         
11.19-5.21_15_min 12/22/2019 20:45      0         
11.19-5.21_15_min 12/22/2019 21:00      0         
11.19-5.21_15_min 12/22/2019 21:15      0         
11.19-5.21_15_min 12/22/2019 21:30      0         
11.19-5.21_15_min 12/22/2019 21:45      0         
11.19-5.21_15_min 12/22/2019 22:00      0         
11.19-5.21_15_min 12/22/2019 22:15      0         
11.19-5.21_15_min 12/22/2019 22:30      0         
11.19-5.21_15_min 12/22/2019 22:45      0         
11.19-5.21_15_min 12/22/2019 23:00      0         
11.19-5.21_15_min 12/22/2019 23:15      0         
11.19-5.21_15_min 12/22/2019 23:30      0         
11.19-5.21_15_min 12/22/2019 23:45      0         
11.19-5.21_15_min 12/23/2019 0:00       0         
11.19-5.21_15_min 12/23/2019 0:15       0         
11.19-5.21_15_min 12/23/2019 0:30       0         
11.19-5.21_15_min 12/23/2019 0:45       0         
11.19-5.21_15_min 12/23/2019 1:00       0         
11.19-5.21_15_min 12/23/2019 1:15       0         
11.19-5.21_15_min 12/23/2019 1:30       0         
11.19-5.21_15_min 12/23/2019 1:45       0         
11.19-5.21_15_min 12/23/2019 2:00       0         
11.19-5.21_15_min 12/23/2019 2:15       0         
11.19-5.21_15_min 12/23/2019 2:30       0         
11.19-5.21_15_min 12/23/2019 2:45       0         
11.19-5.21_15_min 12/23/2019 3:00       0         
11.19-5.21_15_min 12/23/2019 3:15       0         
11.19-5.21_15_min 12/23/2019 3:30       0         
11.19-5.21_15_min 12/23/2019 3:45       0         
11.19-5.21_15_min 12/23/2019 4:00       0         
11.19-5.21_15_min 12/23/2019 4:15       0         
11.19-5.21_15_min 12/23/2019 4:30       0         
11.19-5.21_15_min 12/23/2019 4:45       0         
11.19-5.21_15_min 12/23/2019 5:00       0         
11.19-5.21_15_min 12/23/2019 5:15       0         
11.19-5.21_15_min 12/23/2019 5:30       0         
11.19-5.21_15_min 12/23/2019 5:45       0         
11.19-5.21_15_min 12/23/2019 6:00       0         
11.19-5.21_15_min 12/23/2019 6:15       0         
11.19-5.21_15_min 12/23/2019 6:30       0         
11.19-5.21_15_min 12/23/2019 6:45       0         
11.19-5.21_15_min 12/23/2019 7:00       0         
11.19-5.21_15_min 12/23/2019 7:15       0         
11.19-5.21_15_min 12/23/2019 7:30       0         
11.19-5.21_15_min 12/23/2019 7:45       0         
11.19-5.21_15_min 12/23/2019 8:00       0         
11.19-5.21_15_min 12/23/2019 8:15       0         
11.19-5.21_15_min 12/23/2019 8:30       0         
11.19-5.21_15_min 12/23/2019 8:45       0         
11.19-5.21_15_min 12/23/2019 9:00       0         
11.19-5.21_15_min 12/23/2019 9:15       0         
11.19-5.21_15_min 12/23/2019 9:30       0         
11.19-5.21_15_min 12/23/2019 9:45       0         
11.19-5.21_15_min 12/23/2019 10:00      0         
11.19-5.21_15_min 12/23/2019 10:15      0         
11.19-5.21_15_min 12/23/2019 10:30      0         
11.19-5.21_15_min 12/23/2019 10:45      0         
11.19-5.21_15_min 12/23/2019 11:00      0         
11.19-5.21_15_min 12/23/2019 11:15      0         
11.19-5.21_15_min 12/23/2019 11:30      0         
11.19-5.21_15_min 12/23/2019 11:45      0         
11.19-5.21_15_min 12/23/2019 12:00      0         
11.19-5.21_15_min 12/23/2019 12:15      0         
11.19-5.21_15_min 12/23/2019 12:30      0         
11.19-5.21_15_min 12/23/2019 12:45      0         
11.19-5.21_15_min 12/23/2019 13:00      0         
11.19-5.21_15_min 12/23/2019 13:15      0         
11.19-5.21_15_min 12/23/2019 13:30      0         
11.19-5.21_15_min 12/23/2019 13:45      0         
11.19-5.21_15_min 12/23/2019 14:00      0         
11.19-5.21_15_min 12/23/2019 14:15      0         
11.19-5.21_15_min 12/23/2019 14:30      0         
11.19-5.21_15_min 12/23/2019 14:45      0         
11.19-5.21_15_min 12/23/2019 15:00      0         
11.19-5.21_15_min 12/23/2019 15:15      0         
11.19-5.21_15_min 12/23/2019 15:30      0         
11.19-5.21_15_min 12/23/2019 15:45      0         
11.19-5.21_15_min 12/23/2019 16:00      0         
11.19-5.21_15_min 12/23/2019 16:15      0         
11.19-5.21_15_min 12/23/2019 16:30      0         
11.19-5.21_15_min 12/23/2019 16:45      0         
11.19-5.21_15_min 12/23/2019 17:00      0         
11.19-5.21_15_min 12/23/2019 17:15      0         
11.19-5.21_15_min 12/23/2019 17:30      0         
11.19-5.21_15_min 12/23/2019 17:45      0         
11.19-5.21_15_min 12/23/2019 18:00      0         
11.19-5.21_15_min 12/23/2019 18:15      0         
11.19-5.21_15_min 12/23/2019 18:30      0         
11.19-5.21_15_min 12/23/2019 18:45      0         
11.19-5.21_15_min 12/23/2019 19:00      0         
11.19-5.21_15_min 12/23/2019 19:15      0         
11.19-5.21_15_min 12/23/2019 19:30      0         
11.19-5.21_15_min 12/23/2019 19:45      0         
11.19-5.21_15_min 12/23/2019 20:00      0         
11.19-5.21_15_min 12/23/2019 20:15      0         
11.19-5.21_15_min 12/23/2019 20:30      0         
11.19-5.21_15_min 12/23/2019 20:45      0         
11.19-5.21_15_min 12/23/2019 21:00      0         
11.19-5.21_15_min 12/23/2019 21:15      0         
11.19-5.21_15_min 12/23/2019 21:30      0         
11.19-5.21_15_min 12/23/2019 21:45      0         
11.19-5.21_15_min 12/23/2019 22:00      0         
11.19-5.21_15_min 12/23/2019 22:15      0         
11.19-5.21_15_min 12/23/2019 22:30      0         
11.19-5.21_15_min 12/23/2019 22:45      0         
11.19-5.21_15_min 12/23/2019 23:00      0         
11.19-5.21_15_min 12/23/2019 23:15      0         
11.19-5.21_15_min 12/23/2019 23:30      0         
11.19-5.21_15_min 12/23/2019 23:45      0         
11.19-5.21_15_min 12/24/2019 0:00       0         
11.19-5.21_15_min 12/24/2019 0:15       0         
11.19-5.21_15_min 12/24/2019 0:30       0         
11.19-5.21_15_min 12/24/2019 0:45       0         
11.19-5.21_15_min 12/24/2019 1:00       0         
11.19-5.21_15_min 12/24/2019 1:15       0         
11.19-5.21_15_min 12/24/2019 1:30       0         
11.19-5.21_15_min 12/24/2019 1:45       0         
11.19-5.21_15_min 12/24/2019 2:00       0         
11.19-5.21_15_min 12/24/2019 2:15       0         
11.19-5.21_15_min 12/24/2019 2:30       0         
11.19-5.21_15_min 12/24/2019 2:45       0         
11.19-5.21_15_min 12/24/2019 3:00       0         
11.19-5.21_15_min 12/24/2019 3:15       0         
11.19-5.21_15_min 12/24/2019 3:30       0         
11.19-5.21_15_min 12/24/2019 3:45       0         
11.19-5.21_15_min 12/24/2019 4:00       0         
11.19-5.21_15_min 12/24/2019 4:15       0         
11.19-5.21_15_min 12/24/2019 4:30       0         
11.19-5.21_15_min 12/24/2019 4:45       0         
11.19-5.21_15_min 12/24/2019 5:00       0         
11.19-5.21_15_min 12/24/2019 5:15       0         
11.19-5.21_15_min 12/24/2019 5:30       0         
11.19-5.21_15_min 12/24/2019 5:45       0         
11.19-5.21_15_min 12/24/2019 6:00       0         
11.19-5.21_15_min 12/24/2019 6:15       0         
11.19-5.21_15_min 12/24/2019 6:30       0         
11.19-5.21_15_min 12/24/2019 6:45       0         
11.19-5.21_15_min 12/24/2019 7:00       0         
11.19-5.21_15_min 12/24/2019 7:15       0         
11.19-5.21_15_min 12/24/2019 7:30       0         
11.19-5.21_15_min 12/24/2019 7:45       0         
11.19-5.21_15_min 12/24/2019 8:00       0         
11.19-5.21_15_min 12/24/2019 8:15       0         
11.19-5.21_15_min 12/24/2019 8:30       0         
11.19-5.21_15_min 12/24/2019 8:45       0         
11.19-5.21_15_min 12/24/2019 9:00       0         
11.19-5.21_15_min 12/24/2019 9:15       0         
11.19-5.21_15_min 12/24/2019 9:30       0         
11.19-5.21_15_min 12/24/2019 9:45       0         
11.19-5.21_15_min 12/24/2019 10:00      0         
11.19-5.21_15_min 12/24/2019 10:15      0         
11.19-5.21_15_min 12/24/2019 10:30      0         
11.19-5.21_15_min 12/24/2019 10:45      0         
11.19-5.21_15_min 12/24/2019 11:00      0         
11.19-5.21_15_min 12/24/2019 11:15      0         
11.19-5.21_15_min 12/24/2019 11:30      0         
11.19-5.21_15_min 12/24/2019 11:45      0         
11.19-5.21_15_min 12/24/2019 12:00      0         
11.19-5.21_15_min 12/24/2019 12:15      0         
11.19-5.21_15_min 12/24/2019 12:30      0         
11.19-5.21_15_min 12/24/2019 12:45      0         
11.19-5.21_15_min 12/24/2019 13:00      0         
11.19-5.21_15_min 12/24/2019 13:15      0         
11.19-5.21_15_min 12/24/2019 13:30      0         
11.19-5.21_15_min 12/24/2019 13:45      0         
11.19-5.21_15_min 12/24/2019 14:00      0         
11.19-5.21_15_min 12/24/2019 14:15      0         
11.19-5.21_15_min 12/24/2019 14:30      0         
11.19-5.21_15_min 12/24/2019 14:45      0         
11.19-5.21_15_min 12/24/2019 15:00      0         
11.19-5.21_15_min 12/24/2019 15:15      0         
11.19-5.21_15_min 12/24/2019 15:30      0         
11.19-5.21_15_min 12/24/2019 15:45      0         
11.19-5.21_15_min 12/24/2019 16:00      0         
11.19-5.21_15_min 12/24/2019 16:15      0         
11.19-5.21_15_min 12/24/2019 16:30      0         
11.19-5.21_15_min 12/24/2019 16:45      0         
11.19-5.21_15_min 12/24/2019 17:00      0         
11.19-5.21_15_min 12/24/2019 17:15      0         
11.19-5.21_15_min 12/24/2019 17:30      0         
11.19-5.21_15_min 12/24/2019 17:45      0         
11.19-5.21_15_min 12/24/2019 18:00      0         
11.19-5.21_15_min 12/24/2019 18:15      0         
11.19-5.21_15_min 12/24/2019 18:30      0         
11.19-5.21_15_min 12/24/2019 18:45      0         
11.19-5.21_15_min 12/24/2019 19:00      0         
11.19-5.21_15_min 12/24/2019 19:15      0         
11.19-5.21_15_min 12/24/2019 19:30      0         
11.19-5.21_15_min 12/24/2019 19:45      0         
11.19-5.21_15_min 12/24/2019 20:00      0         
11.19-5.21_15_min 12/24/2019 20:15      0         
11.19-5.21_15_min 12/24/2019 20:30      0         
11.19-5.21_15_min 12/24/2019 20:45      0         
11.19-5.21_15_min 12/24/2019 21:00      0         
11.19-5.21_15_min 12/24/2019 21:15      0         
11.19-5.21_15_min 12/24/2019 21:30      0         
11.19-5.21_15_min 12/24/2019 21:45      0         
11.19-5.21_15_min 12/24/2019 22:00      0         
11.19-5.21_15_min 12/24/2019 22:15      0         
11.19-5.21_15_min 12/24/2019 22:30      0         
11.19-5.21_15_min 12/24/2019 22:45      0         
11.19-5.21_15_min 12/24/2019 23:00      0         
11.19-5.21_15_min 12/24/2019 23:15      0         
11.19-5.21_15_min 12/24/2019 23:30      0         
11.19-5.21_15_min 12/24/2019 23:45      0         
11.19-5.21_15_min 12/25/2019 0:00       0         
11.19-5.21_15_min 12/25/2019 0:15       0         
11.19-5.21_15_min 12/25/2019 0:30       0         
11.19-5.21_15_min 12/25/2019 0:45       0         
11.19-5.21_15_min 12/25/2019 1:00       0         
11.19-5.21_15_min 12/25/2019 1:15       0         
11.19-5.21_15_min 12/25/2019 1:30       0         
11.19-5.21_15_min 12/25/2019 1:45       0         
11.19-5.21_15_min 12/25/2019 2:00       0         
11.19-5.21_15_min 12/25/2019 2:15       0         
11.19-5.21_15_min 12/25/2019 2:30       0         
11.19-5.21_15_min 12/25/2019 2:45       0         
11.19-5.21_15_min 12/25/2019 3:00       0         
11.19-5.21_15_min 12/25/2019 3:15       0         
11.19-5.21_15_min 12/25/2019 3:30       0         
11.19-5.21_15_min 12/25/2019 3:45       0         
11.19-5.21_15_min 12/25/2019 4:00       0         
11.19-5.21_15_min 12/25/2019 4:15       0         
11.19-5.21_15_min 12/25/2019 4:30       0         
11.19-5.21_15_min 12/25/2019 4:45       0         
11.19-5.21_15_min 12/25/2019 5:00       0         
11.19-5.21_15_min 12/25/2019 5:15       0         
11.19-5.21_15_min 12/25/2019 5:30       0         
11.19-5.21_15_min 12/25/2019 5:45       0         
11.19-5.21_15_min 12/25/2019 6:00       0         
11.19-5.21_15_min 12/25/2019 6:15       0         
11.19-5.21_15_min 12/25/2019 6:30       0         
11.19-5.21_15_min 12/25/2019 6:45       0         
11.19-5.21_15_min 12/25/2019 7:00       0         
11.19-5.21_15_min 12/25/2019 7:15       0         
11.19-5.21_15_min 12/25/2019 7:30       0         
11.19-5.21_15_min 12/25/2019 7:45       0         
11.19-5.21_15_min 12/25/2019 8:00       0         
11.19-5.21_15_min 12/25/2019 8:15       0         
11.19-5.21_15_min 12/25/2019 8:30       0         
11.19-5.21_15_min 12/25/2019 8:45       0         
11.19-5.21_15_min 12/25/2019 10:00      0         
11.19-5.21_15_min 12/25/2019 10:15      0         
11.19-5.21_15_min 12/25/2019 10:45      0         
11.19-5.21_15_min 12/25/2019 13:00      0         
11.19-5.21_15_min 12/25/2019 13:15      0         
11.19-5.21_15_min 12/25/2019 13:30      0         
11.19-5.21_15_min 12/25/2019 13:45      0         
11.19-5.21_15_min 12/25/2019 14:00      0         
11.19-5.21_15_min 12/25/2019 14:15      0         
11.19-5.21_15_min 12/25/2019 14:30      0         
11.19-5.21_15_min 12/25/2019 14:45      0         
11.19-5.21_15_min 12/25/2019 15:00      0         
11.19-5.21_15_min 12/25/2019 15:15      0         
11.19-5.21_15_min 12/25/2019 15:30      0         
11.19-5.21_15_min 12/25/2019 17:00      0         
11.19-5.21_15_min 12/25/2019 17:15      0         
11.19-5.21_15_min 12/25/2019 17:45      0         
11.19-5.21_15_min 12/25/2019 18:00      0         
11.19-5.21_15_min 12/25/2019 18:15      0         
11.19-5.21_15_min 12/25/2019 18:30      0         
11.19-5.21_15_min 12/25/2019 18:45      0         
11.19-5.21_15_min 12/25/2019 19:00      0         
11.19-5.21_15_min 12/25/2019 20:00      0         
11.19-5.21_15_min 12/25/2019 20:15      0         
11.19-5.21_15_min 12/25/2019 20:30      0         
11.19-5.21_15_min 12/25/2019 20:45      0         
11.19-5.21_15_min 12/25/2019 21:00      0         
11.19-5.21_15_min 12/25/2019 21:15      0         
11.19-5.21_15_min 12/25/2019 21:30      0         
11.19-5.21_15_min 12/25/2019 21:45      0         
11.19-5.21_15_min 12/25/2019 22:00      0         
11.19-5.21_15_min 12/25/2019 22:15      0         
11.19-5.21_15_min 12/25/2019 22:30      0         
11.19-5.21_15_min 12/25/2019 22:45      0         
11.19-5.21_15_min 12/25/2019 23:00      0         
11.19-5.21_15_min 12/25/2019 23:15      0         
11.19-5.21_15_min 12/25/2019 23:30      0         
11.19-5.21_15_min 12/25/2019 23:45      0         
11.19-5.21_15_min 12/26/2019 0:00       0         
11.19-5.21_15_min 12/26/2019 0:15       0         
11.19-5.21_15_min 12/26/2019 0:30       0         
11.19-5.21_15_min 12/26/2019 0:45       0         
11.19-5.21_15_min 12/26/2019 1:00       0         
11.19-5.21_15_min 12/26/2019 1:15       0         
11.19-5.21_15_min 12/26/2019 1:30       0         
11.19-5.21_15_min 12/26/2019 1:45       0         
11.19-5.21_15_min 12/26/2019 2:00       0         
11.19-5.21_15_min 12/26/2019 2:15       0         
11.19-5.21_15_min 12/26/2019 2:30       0         
11.19-5.21_15_min 12/26/2019 2:45       0         
11.19-5.21_15_min 12/26/2019 3:00       0         
11.19-5.21_15_min 12/26/2019 3:15       0         
11.19-5.21_15_min 12/26/2019 3:30       0         
11.19-5.21_15_min 12/26/2019 3:45       0         
11.19-5.21_15_min 12/26/2019 4:00       0         
11.19-5.21_15_min 12/26/2019 4:15       0         
11.19-5.21_15_min 12/26/2019 4:30       0         
11.19-5.21_15_min 12/26/2019 4:45       0         
11.19-5.21_15_min 12/26/2019 5:00       0         
11.19-5.21_15_min 12/26/2019 5:15       0         
11.19-5.21_15_min 12/26/2019 5:30       0         
11.19-5.21_15_min 12/26/2019 5:45       0         
11.19-5.21_15_min 12/26/2019 6:00       0         
11.19-5.21_15_min 12/26/2019 6:15       0         
11.19-5.21_15_min 12/26/2019 6:30       0         
11.19-5.21_15_min 12/26/2019 6:45       0         
11.19-5.21_15_min 12/26/2019 7:00       0         
11.19-5.21_15_min 12/26/2019 7:15       0         
11.19-5.21_15_min 12/26/2019 7:30       0         
11.19-5.21_15_min 12/26/2019 7:45       0         
11.19-5.21_15_min 12/26/2019 8:00       0         
11.19-5.21_15_min 12/26/2019 8:15       0         
11.19-5.21_15_min 12/26/2019 8:30       0         
11.19-5.21_15_min 12/26/2019 8:45       0         
11.19-5.21_15_min 12/26/2019 9:00       0         
11.19-5.21_15_min 12/26/2019 9:15       0         
11.19-5.21_15_min 12/26/2019 9:30       0         
11.19-5.21_15_min 12/26/2019 9:45       0         
11.19-5.21_15_min 12/26/2019 10:00      0         
11.19-5.21_15_min 12/26/2019 10:15      0         
11.19-5.21_15_min 12/26/2019 10:30      0         
11.19-5.21_15_min 12/26/2019 10:45      0         
11.19-5.21_15_min 12/26/2019 11:00      0         
11.19-5.21_15_min 12/26/2019 11:15      0         
11.19-5.21_15_min 12/26/2019 11:30      0         
11.19-5.21_15_min 12/26/2019 11:45      0         
11.19-5.21_15_min 12/26/2019 12:00      0         
11.19-5.21_15_min 12/26/2019 12:15      0         
11.19-5.21_15_min 12/26/2019 12:30      0         
11.19-5.21_15_min 12/26/2019 12:45      0         
11.19-5.21_15_min 12/26/2019 13:00      0         
11.19-5.21_15_min 12/26/2019 13:15      0         
11.19-5.21_15_min 12/26/2019 13:30      0         
11.19-5.21_15_min 12/26/2019 13:45      0         
11.19-5.21_15_min 12/26/2019 14:00      0         
11.19-5.21_15_min 12/26/2019 14:15      0         
11.19-5.21_15_min 12/26/2019 14:30      0         
11.19-5.21_15_min 12/26/2019 14:45      0         
11.19-5.21_15_min 12/26/2019 15:00      0         
11.19-5.21_15_min 12/26/2019 15:15      0         
11.19-5.21_15_min 12/26/2019 15:30      0         
11.19-5.21_15_min 12/26/2019 15:45      0         
11.19-5.21_15_min 12/26/2019 16:00      0         
11.19-5.21_15_min 12/26/2019 16:15      0         
11.19-5.21_15_min 12/26/2019 16:30      0         
11.19-5.21_15_min 12/26/2019 16:45      0         
11.19-5.21_15_min 12/26/2019 17:00      0         
11.19-5.21_15_min 12/26/2019 17:15      0         
11.19-5.21_15_min 12/26/2019 17:30      0         
11.19-5.21_15_min 12/26/2019 17:45      0         
11.19-5.21_15_min 12/26/2019 18:00      0         
11.19-5.21_15_min 12/26/2019 18:15      0         
11.19-5.21_15_min 12/26/2019 18:30      0         
11.19-5.21_15_min 12/26/2019 18:45      0         
11.19-5.21_15_min 12/26/2019 19:00      0         
11.19-5.21_15_min 12/26/2019 19:15      0         
11.19-5.21_15_min 12/26/2019 19:30      0         
11.19-5.21_15_min 12/26/2019 19:45      0         
11.19-5.21_15_min 12/26/2019 20:00      0         
11.19-5.21_15_min 12/26/2019 20:15      0         
11.19-5.21_15_min 12/26/2019 20:30      0         
11.19-5.21_15_min 12/26/2019 20:45      0         
11.19-5.21_15_min 12/26/2019 21:00      0         
11.19-5.21_15_min 12/26/2019 21:15      0         
11.19-5.21_15_min 12/26/2019 21:30      0         
11.19-5.21_15_min 12/26/2019 21:45      0         
11.19-5.21_15_min 12/26/2019 22:00      0         
11.19-5.21_15_min 12/26/2019 22:15      0         
11.19-5.21_15_min 12/26/2019 22:30      0         
11.19-5.21_15_min 12/26/2019 22:45      0         
11.19-5.21_15_min 12/26/2019 23:00      0         
11.19-5.21_15_min 12/26/2019 23:15      0         
11.19-5.21_15_min 12/26/2019 23:30      0         
11.19-5.21_15_min 12/26/2019 23:45      0         
11.19-5.21_15_min 12/27/2019 0:00       0         
11.19-5.21_15_min 12/27/2019 0:15       0         
11.19-5.21_15_min 12/27/2019 0:30       0         
11.19-5.21_15_min 12/27/2019 0:45       0         
11.19-5.21_15_min 12/27/2019 1:00       0         
11.19-5.21_15_min 12/27/2019 1:15       0         
11.19-5.21_15_min 12/27/2019 1:30       0         
11.19-5.21_15_min 12/27/2019 1:45       0         
11.19-5.21_15_min 12/27/2019 2:00       0         
11.19-5.21_15_min 12/27/2019 2:15       0         
11.19-5.21_15_min 12/27/2019 2:30       0         
11.19-5.21_15_min 12/27/2019 2:45       0         
11.19-5.21_15_min 12/27/2019 3:00       0         
11.19-5.21_15_min 12/27/2019 3:15       0         
11.19-5.21_15_min 12/27/2019 3:30       0         
11.19-5.21_15_min 12/27/2019 3:45       0         
11.19-5.21_15_min 12/27/2019 4:00       0         
11.19-5.21_15_min 12/27/2019 4:15       0         
11.19-5.21_15_min 12/27/2019 4:30       0         
11.19-5.21_15_min 12/27/2019 4:45       0         
11.19-5.21_15_min 12/27/2019 5:00       0         
11.19-5.21_15_min 12/27/2019 5:15       0         
11.19-5.21_15_min 12/27/2019 5:30       0         
11.19-5.21_15_min 12/27/2019 5:45       0         
11.19-5.21_15_min 12/27/2019 6:00       0         
11.19-5.21_15_min 12/27/2019 6:15       0         
11.19-5.21_15_min 12/27/2019 6:30       0         
11.19-5.21_15_min 12/27/2019 6:45       0         
11.19-5.21_15_min 12/27/2019 7:00       0         
11.19-5.21_15_min 12/27/2019 7:15       0         
11.19-5.21_15_min 12/27/2019 7:30       0         
11.19-5.21_15_min 12/27/2019 7:45       0         
11.19-5.21_15_min 12/27/2019 8:00       0         
11.19-5.21_15_min 12/27/2019 8:15       0         
11.19-5.21_15_min 12/27/2019 8:30       0         
11.19-5.21_15_min 12/27/2019 8:45       0         
11.19-5.21_15_min 12/27/2019 9:00       0         
11.19-5.21_15_min 12/27/2019 9:15       0         
11.19-5.21_15_min 12/27/2019 9:30       0         
11.19-5.21_15_min 12/27/2019 9:45       0         
11.19-5.21_15_min 12/27/2019 10:00      0         
11.19-5.21_15_min 12/27/2019 10:15      0         
11.19-5.21_15_min 12/27/2019 10:30      0         
11.19-5.21_15_min 12/27/2019 10:45      0         
11.19-5.21_15_min 12/27/2019 11:00      0         
11.19-5.21_15_min 12/27/2019 11:15      0         
11.19-5.21_15_min 12/27/2019 11:30      0         
11.19-5.21_15_min 12/27/2019 11:45      0         
11.19-5.21_15_min 12/27/2019 12:00      0         
11.19-5.21_15_min 12/27/2019 12:15      0         
11.19-5.21_15_min 12/27/2019 12:30      0         
11.19-5.21_15_min 12/27/2019 12:45      0         
11.19-5.21_15_min 12/27/2019 13:00      0         
11.19-5.21_15_min 12/27/2019 13:15      0         
11.19-5.21_15_min 12/27/2019 13:30      0         
11.19-5.21_15_min 12/27/2019 13:45      0         
11.19-5.21_15_min 12/27/2019 14:00      0         
11.19-5.21_15_min 12/27/2019 14:15      0         
11.19-5.21_15_min 12/27/2019 14:30      0         
11.19-5.21_15_min 12/27/2019 14:45      0         
11.19-5.21_15_min 12/27/2019 15:00      0         
11.19-5.21_15_min 12/27/2019 15:15      0         
11.19-5.21_15_min 12/27/2019 15:30      0         
11.19-5.21_15_min 12/27/2019 15:45      0         
11.19-5.21_15_min 12/27/2019 16:00      0         
11.19-5.21_15_min 12/27/2019 16:15      0         
11.19-5.21_15_min 12/27/2019 16:30      0         
11.19-5.21_15_min 12/27/2019 16:45      0         
11.19-5.21_15_min 12/27/2019 17:00      0         
11.19-5.21_15_min 12/27/2019 17:15      0         
11.19-5.21_15_min 12/27/2019 17:30      0         
11.19-5.21_15_min 12/27/2019 17:45      0         
11.19-5.21_15_min 12/27/2019 18:00      0         
11.19-5.21_15_min 12/27/2019 18:15      0         
11.19-5.21_15_min 12/27/2019 18:30      0         
11.19-5.21_15_min 12/27/2019 18:45      0         
11.19-5.21_15_min 12/27/2019 19:00      0         
11.19-5.21_15_min 12/27/2019 19:15      0         
11.19-5.21_15_min 12/27/2019 19:30      0         
11.19-5.21_15_min 12/27/2019 19:45      0         
11.19-5.21_15_min 12/27/2019 20:00      0         
11.19-5.21_15_min 12/27/2019 20:15      0         
11.19-5.21_15_min 12/27/2019 20:30      0         
11.19-5.21_15_min 12/27/2019 20:45      0         
11.19-5.21_15_min 12/27/2019 21:00      0         
11.19-5.21_15_min 12/27/2019 21:15      0         
11.19-5.21_15_min 12/27/2019 21:30      0         
11.19-5.21_15_min 12/27/2019 21:45      0         
11.19-5.21_15_min 12/27/2019 22:00      0         
11.19-5.21_15_min 12/27/2019 22:15      0         
11.19-5.21_15_min 12/27/2019 22:30      0         
11.19-5.21_15_min 12/27/2019 22:45      0         
11.19-5.21_15_min 12/27/2019 23:00      0         
11.19-5.21_15_min 12/27/2019 23:15      0         
11.19-5.21_15_min 12/27/2019 23:30      0         
11.19-5.21_15_min 12/27/2019 23:45      0         
11.19-5.21_15_min 12/28/2019 0:00       0         
11.19-5.21_15_min 12/28/2019 0:15       0         
11.19-5.21_15_min 12/28/2019 0:30       0         
11.19-5.21_15_min 12/28/2019 0:45       0         
11.19-5.21_15_min 12/28/2019 1:00       0         
11.19-5.21_15_min 12/28/2019 1:15       0         
11.19-5.21_15_min 12/28/2019 1:30       0         
11.19-5.21_15_min 12/28/2019 1:45       0         
11.19-5.21_15_min 12/28/2019 2:00       0         
11.19-5.21_15_min 12/28/2019 2:15       0         
11.19-5.21_15_min 12/28/2019 2:30       0         
11.19-5.21_15_min 12/28/2019 2:45       0         
11.19-5.21_15_min 12/28/2019 3:00       0         
11.19-5.21_15_min 12/28/2019 3:15       0         
11.19-5.21_15_min 12/28/2019 3:30       0         
11.19-5.21_15_min 12/28/2019 3:45       0         
11.19-5.21_15_min 12/28/2019 4:00       0         
11.19-5.21_15_min 12/28/2019 4:15       0         
11.19-5.21_15_min 12/28/2019 4:30       0         
11.19-5.21_15_min 12/28/2019 4:45       0         
11.19-5.21_15_min 12/28/2019 5:00       0         
11.19-5.21_15_min 12/28/2019 5:15       0         
11.19-5.21_15_min 12/28/2019 5:30       0         
11.19-5.21_15_min 12/28/2019 5:45       0         
11.19-5.21_15_min 12/28/2019 6:00       0         
11.19-5.21_15_min 12/28/2019 6:15       0         
11.19-5.21_15_min 12/28/2019 6:30       0         
11.19-5.21_15_min 12/28/2019 6:45       0         
11.19-5.21_15_min 12/28/2019 7:00       0         
11.19-5.21_15_min 12/28/2019 7:15       0         
11.19-5.21_15_min 12/28/2019 7:30       0         
11.19-5.21_15_min 12/28/2019 7:45       0         
11.19-5.21_15_min 12/28/2019 8:00       0         
11.19-5.21_15_min 12/28/2019 8:15       0         
11.19-5.21_15_min 12/28/2019 8:30       0         
11.19-5.21_15_min 12/28/2019 8:45       0         
11.19-5.21_15_min 12/28/2019 9:00       0         
11.19-5.21_15_min 12/28/2019 9:15       0         
11.19-5.21_15_min 12/28/2019 9:30       0         
11.19-5.21_15_min 12/28/2019 9:45       0         
11.19-5.21_15_min 12/28/2019 10:00      0         
11.19-5.21_15_min 12/28/2019 10:15      0         
11.19-5.21_15_min 12/28/2019 10:30      0         
11.19-5.21_15_min 12/28/2019 10:45      0         
11.19-5.21_15_min 12/28/2019 11:00      0         
11.19-5.21_15_min 12/28/2019 11:15      0         
11.19-5.21_15_min 12/28/2019 11:30      0         
11.19-5.21_15_min 12/28/2019 11:45      0         
11.19-5.21_15_min 12/28/2019 12:00      0         
11.19-5.21_15_min 12/28/2019 12:15      0         
11.19-5.21_15_min 12/28/2019 12:30      0         
11.19-5.21_15_min 12/28/2019 12:45      0         
11.19-5.21_15_min 12/28/2019 13:00      0         
11.19-5.21_15_min 12/28/2019 13:15      0         
11.19-5.21_15_min 12/28/2019 13:30      0         
11.19-5.21_15_min 12/28/2019 13:45      0         
11.19-5.21_15_min 12/28/2019 14:00      0         
11.19-5.21_15_min 12/28/2019 14:15      0         
11.19-5.21_15_min 12/28/2019 14:30      0         
11.19-5.21_15_min 12/28/2019 14:45      0         
11.19-5.21_15_min 12/28/2019 15:00      0         
11.19-5.21_15_min 12/28/2019 15:15      0         
11.19-5.21_15_min 12/28/2019 15:30      0         
11.19-5.21_15_min 12/28/2019 15:45      0         
11.19-5.21_15_min 12/28/2019 16:00      0         
11.19-5.21_15_min 12/28/2019 16:15      0         
11.19-5.21_15_min 12/28/2019 16:30      0         
11.19-5.21_15_min 12/28/2019 16:45      0         
11.19-5.21_15_min 12/28/2019 17:00      0         
11.19-5.21_15_min 12/28/2019 17:15      0         
11.19-5.21_15_min 12/28/2019 17:30      0         
11.19-5.21_15_min 12/28/2019 17:45      0         
11.19-5.21_15_min 12/28/2019 18:00      0         
11.19-5.21_15_min 12/28/2019 18:15      0         
11.19-5.21_15_min 12/28/2019 18:30      0         
11.19-5.21_15_min 12/28/2019 18:45      0         
11.19-5.21_15_min 12/28/2019 19:00      0         
11.19-5.21_15_min 12/28/2019 19:15      0         
11.19-5.21_15_min 12/28/2019 19:30      0         
11.19-5.21_15_min 12/28/2019 19:45      0         
11.19-5.21_15_min 12/28/2019 20:00      0         
11.19-5.21_15_min 12/28/2019 20:15      0         
11.19-5.21_15_min 12/28/2019 20:30      0         
11.19-5.21_15_min 12/28/2019 20:45      0         
11.19-5.21_15_min 12/28/2019 21:00      0         
11.19-5.21_15_min 12/28/2019 21:15      0         
11.19-5.21_15_min 12/28/2019 21:30      0         
11.19-5.21_15_min 12/28/2019 21:45      0         
11.19-5.21_15_min 12/28/2019 22:00      0         
11.19-5.21_15_min 12/28/2019 22:15      0         
11.19-5.21_15_min 12/28/2019 22:30      0         
11.19-5.21_15_min 12/28/2019 22:45      0         
11.19-5.21_15_min 12/28/2019 23:00      0         
11.19-5.21_15_min 12/28/2019 23:15      0         
11.19-5.21_15_min 12/28/2019 23:30      0         
11.19-5.21_15_min 12/28/2019 23:45      0         
11.19-5.21_15_min 12/29/2019 0:00       0         
11.19-5.21_15_min 12/29/2019 0:15       0         
11.19-5.21_15_min 12/29/2019 0:30       0         
11.19-5.21_15_min 12/29/2019 0:45       0         
11.19-5.21_15_min 12/29/2019 1:00       0         
11.19-5.21_15_min 12/29/2019 1:15       0         
11.19-5.21_15_min 12/29/2019 1:30       0         
11.19-5.21_15_min 12/29/2019 1:45       0         
11.19-5.21_15_min 12/29/2019 2:00       0         
11.19-5.21_15_min 12/29/2019 2:15       0         
11.19-5.21_15_min 12/29/2019 2:30       0         
11.19-5.21_15_min 12/29/2019 2:45       0         
11.19-5.21_15_min 12/29/2019 3:00       0         
11.19-5.21_15_min 12/29/2019 3:15       0         
11.19-5.21_15_min 12/29/2019 3:30       0         
11.19-5.21_15_min 12/29/2019 3:45       0         
11.19-5.21_15_min 12/29/2019 4:00       0         
11.19-5.21_15_min 12/29/2019 4:15       0         
11.19-5.21_15_min 12/29/2019 4:30       0         
11.19-5.21_15_min 12/29/2019 4:45       0         
11.19-5.21_15_min 12/29/2019 5:00       0         
11.19-5.21_15_min 12/29/2019 5:15       0         
11.19-5.21_15_min 12/29/2019 5:30       0         
11.19-5.21_15_min 12/29/2019 5:45       0         
11.19-5.21_15_min 12/29/2019 6:00       0         
11.19-5.21_15_min 12/29/2019 6:15       0         
11.19-5.21_15_min 12/29/2019 6:30       0         
11.19-5.21_15_min 12/29/2019 6:45       0         
11.19-5.21_15_min 12/29/2019 7:00       0         
11.19-5.21_15_min 12/29/2019 7:15       0         
11.19-5.21_15_min 12/29/2019 7:30       0         
11.19-5.21_15_min 12/29/2019 7:45       0         
11.19-5.21_15_min 12/29/2019 8:00       0         
11.19-5.21_15_min 12/29/2019 8:15       0         
11.19-5.21_15_min 12/29/2019 8:30       0         
11.19-5.21_15_min 12/29/2019 8:45       0         
11.19-5.21_15_min 12/29/2019 9:00       0         
11.19-5.21_15_min 12/29/2019 9:15       0         
11.19-5.21_15_min 12/29/2019 9:30       0         
11.19-5.21_15_min 12/29/2019 9:45       0         
11.19-5.21_15_min 12/29/2019 10:00      0         
11.19-5.21_15_min 12/29/2019 10:15      0         
11.19-5.21_15_min 12/29/2019 10:30      0         
11.19-5.21_15_min 12/29/2019 10:45      0         
11.19-5.21_15_min 12/29/2019 11:00      0         
11.19-5.21_15_min 12/29/2019 11:15      0         
11.19-5.21_15_min 12/29/2019 11:30      0         
11.19-5.21_15_min 12/29/2019 11:45      0         
11.19-5.21_15_min 12/29/2019 12:00      0         
11.19-5.21_15_min 12/29/2019 12:15      0         
11.19-5.21_15_min 12/29/2019 12:30      0         
11.19-5.21_15_min 12/29/2019 12:45      0         
11.19-5.21_15_min 12/29/2019 13:00      0         
11.19-5.21_15_min 12/29/2019 13:15      0         
11.19-5.21_15_min 12/29/2019 13:30      0         
11.19-5.21_15_min 12/29/2019 13:45      0         
11.19-5.21_15_min 12/29/2019 14:00      0         
11.19-5.21_15_min 12/29/2019 14:15      0         
11.19-5.21_15_min 12/29/2019 14:30      0         
11.19-5.21_15_min 12/29/2019 14:45      0         
11.19-5.21_15_min 12/29/2019 15:00      0         
11.19-5.21_15_min 12/29/2019 15:15      0         
11.19-5.21_15_min 12/29/2019 15:30      0         
11.19-5.21_15_min 12/29/2019 15:45      0         
11.19-5.21_15_min 12/29/2019 16:00      0         
11.19-5.21_15_min 12/29/2019 16:15      0         
11.19-5.21_15_min 12/29/2019 16:30      0         
11.19-5.21_15_min 12/29/2019 16:45      0         
11.19-5.21_15_min 12/29/2019 17:00      0         
11.19-5.21_15_min 12/29/2019 17:15      0         
11.19-5.21_15_min 12/29/2019 17:30      0         
11.19-5.21_15_min 12/29/2019 17:45      0         
11.19-5.21_15_min 12/29/2019 18:00      0         
11.19-5.21_15_min 12/29/2019 18:15      0         
11.19-5.21_15_min 12/29/2019 18:30      0         
11.19-5.21_15_min 12/29/2019 18:45      0         
11.19-5.21_15_min 12/29/2019 19:00      0.01      
11.19-5.21_15_min 12/29/2019 19:15      0         
11.19-5.21_15_min 12/29/2019 19:30      0.01      
11.19-5.21_15_min 12/29/2019 19:45      0.01      
11.19-5.21_15_min 12/29/2019 20:00      0.01      
11.19-5.21_15_min 12/29/2019 20:15      0.01      
11.19-5.21_15_min 12/29/2019 20:45      0.01      
11.19-5.21_15_min 12/30/2019 1:30       0         
11.19-5.21_15_min 12/30/2019 1:45       0         
11.19-5.21_15_min 12/30/2019 2:00       0         
11.19-5.21_15_min 12/30/2019 2:15       0.03      
11.19-5.21_15_min 12/30/2019 2:30       0         
11.19-5.21_15_min 12/30/2019 2:45       0.02      
11.19-5.21_15_min 12/30/2019 3:00       0.01      
11.19-5.21_15_min 12/30/2019 3:15       0         
11.19-5.21_15_min 12/30/2019 3:30       0.01      
11.19-5.21_15_min 12/30/2019 3:45       0.01      
11.19-5.21_15_min 12/30/2019 4:00       0.01      
11.19-5.21_15_min 12/30/2019 4:15       0         
11.19-5.21_15_min 12/30/2019 4:30       0.01      
11.19-5.21_15_min 12/30/2019 4:45       0         
11.19-5.21_15_min 12/30/2019 5:00       0.01      
11.19-5.21_15_min 12/30/2019 5:15       0         
11.19-5.21_15_min 12/30/2019 5:30       0.01      
11.19-5.21_15_min 12/30/2019 5:45       0         
11.19-5.21_15_min 12/30/2019 6:00       0         
11.19-5.21_15_min 12/30/2019 6:15       0.01      
11.19-5.21_15_min 12/30/2019 6:30       0.06      
11.19-5.21_15_min 12/30/2019 6:45       0.05      
11.19-5.21_15_min 12/30/2019 7:00       0.04      
11.19-5.21_15_min 12/30/2019 7:15       0.01      
11.19-5.21_15_min 12/30/2019 7:30       0         
11.19-5.21_15_min 12/30/2019 7:45       0         
11.19-5.21_15_min 12/30/2019 8:00       0.01      
11.19-5.21_15_min 12/30/2019 8:15       0.01      
11.19-5.21_15_min 12/30/2019 8:30       0         
11.19-5.21_15_min 12/30/2019 8:45       0         
11.19-5.21_15_min 12/30/2019 9:00       0         
11.19-5.21_15_min 12/30/2019 9:15       0         
11.19-5.21_15_min 12/30/2019 10:30      0         
11.19-5.21_15_min 12/30/2019 10:45      0.03      
11.19-5.21_15_min 12/30/2019 11:00      0.03      
11.19-5.21_15_min 12/30/2019 11:30      0.01      
11.19-5.21_15_min 12/30/2019 11:45      0         
11.19-5.21_15_min 12/30/2019 12:00      0.01      
11.19-5.21_15_min 12/30/2019 12:15      0         
11.19-5.21_15_min 12/30/2019 13:00      0         
11.19-5.21_15_min 12/30/2019 13:15      0         
11.19-5.21_15_min 12/30/2019 14:00      0         
11.19-5.21_15_min 12/30/2019 14:15      0         
11.19-5.21_15_min 12/30/2019 14:30      0.01      
11.19-5.21_15_min 12/30/2019 14:45      0         
11.19-5.21_15_min 12/30/2019 15:00      0         
11.19-5.21_15_min 12/30/2019 15:15      0.01      
11.19-5.21_15_min 12/30/2019 15:30      0.01      
11.19-5.21_15_min 12/30/2019 15:45      0.01      
11.19-5.21_15_min 12/30/2019 16:00      0         
11.19-5.21_15_min 12/30/2019 16:15      0         
11.19-5.21_15_min 12/30/2019 16:30      0.01      
11.19-5.21_15_min 12/30/2019 16:45      0.02      
11.19-5.21_15_min 12/30/2019 17:00      0.01      
11.19-5.21_15_min 12/30/2019 17:15      0.02      
11.19-5.21_15_min 12/30/2019 17:30      0.05      
11.19-5.21_15_min 12/30/2019 17:45      0.04      
11.19-5.21_15_min 12/30/2019 18:00      0.02      
11.19-5.21_15_min 12/30/2019 18:15      0.03      
11.19-5.21_15_min 12/30/2019 18:30      0.01      
11.19-5.21_15_min 12/30/2019 18:45      0.03      
11.19-5.21_15_min 12/30/2019 19:00      0.01      
11.19-5.21_15_min 12/30/2019 19:15      0.03      
11.19-5.21_15_min 12/30/2019 19:30      0.02      
11.19-5.21_15_min 12/30/2019 19:45      0.02      
11.19-5.21_15_min 12/30/2019 20:00      0.01      
11.19-5.21_15_min 12/30/2019 20:15      0.01      
11.19-5.21_15_min 12/30/2019 20:30      0.02      
11.19-5.21_15_min 12/30/2019 20:45      0         
11.19-5.21_15_min 12/30/2019 21:00      0.01      
11.19-5.21_15_min 12/30/2019 21:15      0.02      
11.19-5.21_15_min 12/30/2019 21:30      0         
11.19-5.21_15_min 12/30/2019 21:45      0.02      
11.19-5.21_15_min 12/30/2019 22:00      0.01      
11.19-5.21_15_min 12/30/2019 22:15      0.01      
11.19-5.21_15_min 12/30/2019 22:30      0         
11.19-5.21_15_min 12/30/2019 22:45      0.01      
11.19-5.21_15_min 12/30/2019 23:00      0.02      
11.19-5.21_15_min 12/30/2019 23:15      0         
11.19-5.21_15_min 12/30/2019 23:30      0.01      
11.19-5.21_15_min 12/30/2019 23:45      0         
11.19-5.21_15_min 12/31/2019 0:00       0         
11.19-5.21_15_min 12/31/2019 0:15       0         
11.19-5.21_15_min 12/31/2019 0:30       0         
11.19-5.21_15_min 12/31/2019 0:45       0         
11.19-5.21_15_min 12/31/2019 1:00       0.01      
11.19-5.21_15_min 12/31/2019 1:15       0         
11.19-5.21_15_min 12/31/2019 1:30       0         
11.19-5.21_15_min 12/31/2019 1:45       0         
11.19-5.21_15_min 12/31/2019 2:00       0.01      
11.19-5.21_15_min 12/31/2019 2:15       0         
11.19-5.21_15_min 12/31/2019 2:30       0         
11.19-5.21_15_min 12/31/2019 2:45       0.01      
11.19-5.21_15_min 12/31/2019 3:00       0         
11.19-5.21_15_min 12/31/2019 3:15       0.01      
11.19-5.21_15_min 12/31/2019 3:30       0.01      
11.19-5.21_15_min 12/31/2019 3:45       0.02      
11.19-5.21_15_min 12/31/2019 4:00       0.01      
11.19-5.21_15_min 12/31/2019 4:15       0         
11.19-5.21_15_min 12/31/2019 4:30       0.01      
11.19-5.21_15_min 12/31/2019 4:45       0         
11.19-5.21_15_min 12/31/2019 5:00       0         
11.19-5.21_15_min 12/31/2019 5:15       0         
11.19-5.21_15_min 12/31/2019 5:30       0         
11.19-5.21_15_min 12/31/2019 5:45       0         
11.19-5.21_15_min 12/31/2019 6:00       0         
11.19-5.21_15_min 12/31/2019 6:15       0         
11.19-5.21_15_min 12/31/2019 6:30       0         
11.19-5.21_15_min 12/31/2019 6:45       0         
11.19-5.21_15_min 12/31/2019 7:00       0         
11.19-5.21_15_min 12/31/2019 7:15       0         
11.19-5.21_15_min 12/31/2019 7:30       0         
11.19-5.21_15_min 12/31/2019 7:45       0         
11.19-5.21_15_min 12/31/2019 8:00       0         
11.19-5.21_15_min 12/31/2019 8:15       0         
11.19-5.21_15_min 12/31/2019 8:30       0         
11.19-5.21_15_min 12/31/2019 8:45       0         
11.19-5.21_15_min 12/31/2019 9:00       0         
11.19-5.21_15_min 12/31/2019 9:15       0         
11.19-5.21_15_min 12/31/2019 9:30       0         
11.19-5.21_15_min 12/31/2019 9:45       0         
11.19-5.21_15_min 12/31/2019 10:00      0         
11.19-5.21_15_min 12/31/2019 10:15      0         
11.19-5.21_15_min 12/31/2019 10:30      0         
11.19-5.21_15_min 12/31/2019 10:45      0         
11.19-5.21_15_min 12/31/2019 11:00      0         
11.19-5.21_15_min 12/31/2019 11:15      0         
11.19-5.21_15_min 12/31/2019 11:30      0         
11.19-5.21_15_min 12/31/2019 11:45      0         
11.19-5.21_15_min 12/31/2019 12:00      0         
11.19-5.21_15_min 12/31/2019 12:15      0         
11.19-5.21_15_min 12/31/2019 12:30      0         
11.19-5.21_15_min 12/31/2019 13:15      0         
11.19-5.21_15_min 12/31/2019 13:30      0         
11.19-5.21_15_min 12/31/2019 13:45      0         
11.19-5.21_15_min 12/31/2019 14:00      0         
11.19-5.21_15_min 12/31/2019 14:15      0         
11.19-5.21_15_min 12/31/2019 14:30      0         
11.19-5.21_15_min 12/31/2019 14:45      0         
11.19-5.21_15_min 12/31/2019 15:00      0         
11.19-5.21_15_min 12/31/2019 15:15      0         
11.19-5.21_15_min 12/31/2019 15:30      0         
11.19-5.21_15_min 12/31/2019 15:45      0         
11.19-5.21_15_min 12/31/2019 16:00      0         
11.19-5.21_15_min 12/31/2019 16:15      0         
11.19-5.21_15_min 12/31/2019 16:30      0         
11.19-5.21_15_min 12/31/2019 16:45      0         
11.19-5.21_15_min 12/31/2019 17:00      0         
11.19-5.21_15_min 12/31/2019 17:15      0         
11.19-5.21_15_min 12/31/2019 17:30      0         
11.19-5.21_15_min 12/31/2019 17:45      0         
11.19-5.21_15_min 12/31/2019 18:00      0         
11.19-5.21_15_min 12/31/2019 18:15      0         
11.19-5.21_15_min 12/31/2019 18:30      0         
11.19-5.21_15_min 12/31/2019 18:45      0         
11.19-5.21_15_min 12/31/2019 19:00      0         
11.19-5.21_15_min 12/31/2019 19:15      0         
11.19-5.21_15_min 12/31/2019 19:30      0         
11.19-5.21_15_min 12/31/2019 19:45      0         
11.19-5.21_15_min 12/31/2019 20:00      0         
11.19-5.21_15_min 12/31/2019 20:15      0         
11.19-5.21_15_min 12/31/2019 20:30      0         
11.19-5.21_15_min 12/31/2019 20:45      0         
11.19-5.21_15_min 12/31/2019 21:00      0         
11.19-5.21_15_min 12/31/2019 21:15      0         
11.19-5.21_15_min 12/31/2019 21:30      0         
11.19-5.21_15_min 12/31/2019 21:45      0         
11.19-5.21_15_min 12/31/2019 22:00      0         
11.19-5.21_15_min 12/31/2019 22:15      0         
11.19-5.21_15_min 12/31/2019 22:30      0         
11.19-5.21_15_min 12/31/2019 22:45      0         
11.19-5.21_15_min 12/31/2019 23:00      0         
11.19-5.21_15_min 12/31/2019 23:15      0         
11.19-5.21_15_min 12/31/2019 23:30      0         
11.19-5.21_15_min 12/31/2019 23:45      0         
11.19-5.21_15_min 1/1/2020   0:00       0         
11.19-5.21_15_min 1/1/2020   0:15       0         
11.19-5.21_15_min 1/1/2020   0:30       0         
11.19-5.21_15_min 1/1/2020   0:45       0         
11.19-5.21_15_min 1/1/2020   1:00       0         
11.19-5.21_15_min 1/1/2020   1:15       0         
11.19-5.21_15_min 1/1/2020   1:30       0         
11.19-5.21_15_min 1/1/2020   1:45       0         
11.19-5.21_15_min 1/1/2020   2:00       0         
11.19-5.21_15_min 1/1/2020   2:15       0         
11.19-5.21_15_min 1/1/2020   2:30       0         
11.19-5.21_15_min 1/1/2020   2:45       0         
11.19-5.21_15_min 1/1/2020   3:00       0         
11.19-5.21_15_min 1/1/2020   3:15       0         
11.19-5.21_15_min 1/1/2020   3:30       0         
11.19-5.21_15_min 1/1/2020   3:45       0         
11.19-5.21_15_min 1/1/2020   4:00       0         
11.19-5.21_15_min 1/1/2020   4:15       0         
11.19-5.21_15_min 1/1/2020   4:30       0         
11.19-5.21_15_min 1/1/2020   4:45       0         
11.19-5.21_15_min 1/1/2020   5:00       0         
11.19-5.21_15_min 1/1/2020   5:15       0         
11.19-5.21_15_min 1/1/2020   5:30       0         
11.19-5.21_15_min 1/1/2020   5:45       0         
11.19-5.21_15_min 1/1/2020   6:00       0         
11.19-5.21_15_min 1/1/2020   6:15       0         
11.19-5.21_15_min 1/1/2020   6:30       0         
11.19-5.21_15_min 1/1/2020   6:45       0         
11.19-5.21_15_min 1/1/2020   7:00       0         
11.19-5.21_15_min 1/1/2020   7:15       0.01      
11.19-5.21_15_min 1/1/2020   7:30       0         
11.19-5.21_15_min 1/1/2020   7:45       0         
11.19-5.21_15_min 1/1/2020   8:00       0         
11.19-5.21_15_min 1/1/2020   8:15       0         
11.19-5.21_15_min 1/1/2020   8:30       0         
11.19-5.21_15_min 1/1/2020   8:45       0         
11.19-5.21_15_min 1/1/2020   9:00       0         
11.19-5.21_15_min 1/1/2020   9:15       0         
11.19-5.21_15_min 1/1/2020   9:30       0         
11.19-5.21_15_min 1/1/2020   9:45       0         
11.19-5.21_15_min 1/1/2020   10:00      0         
11.19-5.21_15_min 1/1/2020   10:15      0         
11.19-5.21_15_min 1/1/2020   10:30      0         
11.19-5.21_15_min 1/1/2020   10:45      0         
11.19-5.21_15_min 1/1/2020   11:00      0         
11.19-5.21_15_min 1/1/2020   11:15      0         
11.19-5.21_15_min 1/1/2020   11:30      0         
11.19-5.21_15_min 1/1/2020   11:45      0         
11.19-5.21_15_min 1/1/2020   12:00      0         
11.19-5.21_15_min 1/1/2020   12:15      0         
11.19-5.21_15_min 1/1/2020   12:30      0         
11.19-5.21_15_min 1/1/2020   12:45      0         
11.19-5.21_15_min 1/1/2020   13:00      0         
11.19-5.21_15_min 1/1/2020   13:15      0         
11.19-5.21_15_min 1/1/2020   13:30      0         
11.19-5.21_15_min 1/1/2020   13:45      0         
11.19-5.21_15_min 1/1/2020   14:00      0         
11.19-5.21_15_min 1/1/2020   14:15      0         
11.19-5.21_15_min 1/1/2020   14:30      0         
11.19-5.21_15_min 1/1/2020   14:45      0         
11.19-5.21_15_min 1/1/2020   15:00      0         
11.19-5.21_15_min 1/1/2020   15:15      0         
11.19-5.21_15_min 1/1/2020   15:30      0         
11.19-5.21_15_min 1/1/2020   15:45      0         
11.19-5.21_15_min 1/1/2020   16:00      0         
11.19-5.21_15_min 1/1/2020   16:15      0         
11.19-5.21_15_min 1/1/2020   16:30      0         
11.19-5.21_15_min 1/1/2020   16:45      0         
11.19-5.21_15_min 1/1/2020   17:00      0         
11.19-5.21_15_min 1/1/2020   17:15      0         
11.19-5.21_15_min 1/1/2020   17:30      0         
11.19-5.21_15_min 1/1/2020   17:45      0         
11.19-5.21_15_min 1/1/2020   18:00      0         
11.19-5.21_15_min 1/1/2020   18:15      0         
11.19-5.21_15_min 1/1/2020   18:30      0         
11.19-5.21_15_min 1/1/2020   18:45      0         
11.19-5.21_15_min 1/1/2020   19:00      0         
11.19-5.21_15_min 1/1/2020   19:15      0         
11.19-5.21_15_min 1/1/2020   19:30      0         
11.19-5.21_15_min 1/1/2020   19:45      0         
11.19-5.21_15_min 1/1/2020   20:00      0         
11.19-5.21_15_min 1/1/2020   20:15      0         
11.19-5.21_15_min 1/1/2020   20:30      0         
11.19-5.21_15_min 1/1/2020   20:45      0         
11.19-5.21_15_min 1/1/2020   21:00      0         
11.19-5.21_15_min 1/1/2020   21:15      0         
11.19-5.21_15_min 1/1/2020   21:30      0         
11.19-5.21_15_min 1/1/2020   21:45      0         
11.19-5.21_15_min 1/1/2020   22:00      0         
11.19-5.21_15_min 1/1/2020   22:15      0         
11.19-5.21_15_min 1/1/2020   22:30      0         
11.19-5.21_15_min 1/1/2020   22:45      0         
11.19-5.21_15_min 1/1/2020   23:00      0         
11.19-5.21_15_min 1/1/2020   23:15      0         
11.19-5.21_15_min 1/1/2020   23:30      0         
11.19-5.21_15_min 1/1/2020   23:45      0         
11.19-5.21_15_min 1/2/2020   0:00       0         
11.19-5.21_15_min 1/2/2020   0:15       0         
11.19-5.21_15_min 1/2/2020   0:30       0         
11.19-5.21_15_min 1/2/2020   0:45       0         
11.19-5.21_15_min 1/2/2020   1:00       0         
11.19-5.21_15_min 1/2/2020   1:15       0         
11.19-5.21_15_min 1/2/2020   1:30       0         
11.19-5.21_15_min 1/2/2020   1:45       0         
11.19-5.21_15_min 1/2/2020   2:00       0         
11.19-5.21_15_min 1/2/2020   2:15       0         
11.19-5.21_15_min 1/2/2020   2:30       0         
11.19-5.21_15_min 1/2/2020   2:45       0         
11.19-5.21_15_min 1/2/2020   3:00       0         
11.19-5.21_15_min 1/2/2020   3:15       0         
11.19-5.21_15_min 1/2/2020   3:30       0         
11.19-5.21_15_min 1/2/2020   3:45       0         
11.19-5.21_15_min 1/2/2020   4:00       0         
11.19-5.21_15_min 1/2/2020   4:15       0         
11.19-5.21_15_min 1/2/2020   4:30       0         
11.19-5.21_15_min 1/2/2020   4:45       0         
11.19-5.21_15_min 1/2/2020   5:00       0         
11.19-5.21_15_min 1/2/2020   5:15       0         
11.19-5.21_15_min 1/2/2020   5:30       0         
11.19-5.21_15_min 1/2/2020   5:45       0         
11.19-5.21_15_min 1/2/2020   6:00       0         
11.19-5.21_15_min 1/2/2020   6:15       0         
11.19-5.21_15_min 1/2/2020   6:30       0         
11.19-5.21_15_min 1/2/2020   6:45       0         
11.19-5.21_15_min 1/2/2020   7:00       0         
11.19-5.21_15_min 1/2/2020   7:15       0         
11.19-5.21_15_min 1/2/2020   7:30       0         
11.19-5.21_15_min 1/2/2020   7:45       0         
11.19-5.21_15_min 1/2/2020   8:00       0         
11.19-5.21_15_min 1/2/2020   8:15       0         
11.19-5.21_15_min 1/2/2020   8:30       0         
11.19-5.21_15_min 1/2/2020   8:45       0         
11.19-5.21_15_min 1/2/2020   9:00       0         
11.19-5.21_15_min 1/2/2020   9:15       0         
11.19-5.21_15_min 1/2/2020   9:30       0         
11.19-5.21_15_min 1/2/2020   9:45       0         
11.19-5.21_15_min 1/2/2020   10:00      0         
11.19-5.21_15_min 1/2/2020   10:15      0         
11.19-5.21_15_min 1/2/2020   10:30      0         
11.19-5.21_15_min 1/2/2020   10:45      0         
11.19-5.21_15_min 1/2/2020   11:00      0         
11.19-5.21_15_min 1/2/2020   11:15      0         
11.19-5.21_15_min 1/2/2020   11:30      0         
11.19-5.21_15_min 1/2/2020   11:45      0         
11.19-5.21_15_min 1/2/2020   12:00      0         
11.19-5.21_15_min 1/2/2020   12:15      0         
11.19-5.21_15_min 1/2/2020   12:30      0         
11.19-5.21_15_min 1/2/2020   12:45      0         
11.19-5.21_15_min 1/2/2020   13:00      0         
11.19-5.21_15_min 1/2/2020   13:15      0         
11.19-5.21_15_min 1/2/2020   13:30      0         
11.19-5.21_15_min 1/2/2020   13:45      0         
11.19-5.21_15_min 1/2/2020   14:00      0         
11.19-5.21_15_min 1/2/2020   14:15      0         
11.19-5.21_15_min 1/2/2020   14:30      0         
11.19-5.21_15_min 1/2/2020   14:45      0         
11.19-5.21_15_min 1/2/2020   15:00      0         
11.19-5.21_15_min 1/2/2020   15:15      0         
11.19-5.21_15_min 1/2/2020   15:30      0         
11.19-5.21_15_min 1/2/2020   15:45      0         
11.19-5.21_15_min 1/2/2020   16:00      0         
11.19-5.21_15_min 1/2/2020   16:15      0         
11.19-5.21_15_min 1/2/2020   16:30      0         
11.19-5.21_15_min 1/2/2020   16:45      0         
11.19-5.21_15_min 1/2/2020   17:00      0         
11.19-5.21_15_min 1/2/2020   17:15      0         
11.19-5.21_15_min 1/2/2020   17:30      0         
11.19-5.21_15_min 1/2/2020   17:45      0         
11.19-5.21_15_min 1/2/2020   18:00      0         
11.19-5.21_15_min 1/2/2020   18:15      0         
11.19-5.21_15_min 1/2/2020   18:30      0         
11.19-5.21_15_min 1/2/2020   18:45      0         
11.19-5.21_15_min 1/2/2020   19:00      0         
11.19-5.21_15_min 1/2/2020   19:15      0         
11.19-5.21_15_min 1/2/2020   19:30      0         
11.19-5.21_15_min 1/2/2020   19:45      0         
11.19-5.21_15_min 1/2/2020   20:00      0         
11.19-5.21_15_min 1/2/2020   20:15      0         
11.19-5.21_15_min 1/2/2020   20:30      0         
11.19-5.21_15_min 1/2/2020   20:45      0         
11.19-5.21_15_min 1/2/2020   21:00      0         
11.19-5.21_15_min 1/2/2020   21:15      0         
11.19-5.21_15_min 1/2/2020   21:30      0         
11.19-5.21_15_min 1/2/2020   21:45      0         
11.19-5.21_15_min 1/2/2020   22:00      0         
11.19-5.21_15_min 1/2/2020   22:15      0         
11.19-5.21_15_min 1/2/2020   22:30      0         
11.19-5.21_15_min 1/2/2020   22:45      0         
11.19-5.21_15_min 1/2/2020   23:00      0         
11.19-5.21_15_min 1/2/2020   23:15      0         
11.19-5.21_15_min 1/2/2020   23:30      0         
11.19-5.21_15_min 1/2/2020   23:45      0         
11.19-5.21_15_min 1/3/2020   0:00       0         
11.19-5.21_15_min 1/3/2020   0:15       0         
11.19-5.21_15_min 1/3/2020   0:30       0         
11.19-5.21_15_min 1/3/2020   0:45       0         
11.19-5.21_15_min 1/3/2020   1:00       0         
11.19-5.21_15_min 1/3/2020   1:15       0         
11.19-5.21_15_min 1/3/2020   1:30       0         
11.19-5.21_15_min 1/3/2020   1:45       0         
11.19-5.21_15_min 1/3/2020   2:00       0         
11.19-5.21_15_min 1/3/2020   2:15       0         
11.19-5.21_15_min 1/3/2020   2:30       0         
11.19-5.21_15_min 1/3/2020   2:45       0         
11.19-5.21_15_min 1/3/2020   3:00       0         
11.19-5.21_15_min 1/3/2020   3:15       0         
11.19-5.21_15_min 1/3/2020   3:30       0         
11.19-5.21_15_min 1/3/2020   3:45       0         
11.19-5.21_15_min 1/3/2020   4:00       0         
11.19-5.21_15_min 1/3/2020   4:15       0         
11.19-5.21_15_min 1/3/2020   4:30       0         
11.19-5.21_15_min 1/3/2020   4:45       0         
11.19-5.21_15_min 1/3/2020   5:00       0         
11.19-5.21_15_min 1/3/2020   5:15       0         
11.19-5.21_15_min 1/3/2020   5:30       0         
11.19-5.21_15_min 1/3/2020   5:45       0         
11.19-5.21_15_min 1/3/2020   6:00       0         
11.19-5.21_15_min 1/3/2020   6:15       0         
11.19-5.21_15_min 1/3/2020   6:30       0         
11.19-5.21_15_min 1/3/2020   6:45       0         
11.19-5.21_15_min 1/3/2020   7:00       0         
11.19-5.21_15_min 1/3/2020   7:15       0         
11.19-5.21_15_min 1/3/2020   7:30       0         
11.19-5.21_15_min 1/3/2020   7:45       0         
11.19-5.21_15_min 1/3/2020   8:00       0         
11.19-5.21_15_min 1/3/2020   8:15       0         
11.19-5.21_15_min 1/3/2020   8:30       0         
11.19-5.21_15_min 1/3/2020   8:45       0         
11.19-5.21_15_min 1/3/2020   9:00       0         
11.19-5.21_15_min 1/3/2020   9:15       0         
11.19-5.21_15_min 1/3/2020   9:30       0         
11.19-5.21_15_min 1/3/2020   9:45       0         
11.19-5.21_15_min 1/3/2020   10:00      0         
11.19-5.21_15_min 1/3/2020   10:15      0         
11.19-5.21_15_min 1/3/2020   10:30      0         
11.19-5.21_15_min 1/3/2020   10:45      0         
11.19-5.21_15_min 1/3/2020   11:00      0         
11.19-5.21_15_min 1/3/2020   11:15      0         
11.19-5.21_15_min 1/3/2020   11:30      0         
11.19-5.21_15_min 1/3/2020   11:45      0         
11.19-5.21_15_min 1/3/2020   12:00      0         
11.19-5.21_15_min 1/3/2020   12:15      0         
11.19-5.21_15_min 1/3/2020   12:30      0         
11.19-5.21_15_min 1/3/2020   12:45      0         
11.19-5.21_15_min 1/3/2020   13:00      0         
11.19-5.21_15_min 1/3/2020   13:15      0         
11.19-5.21_15_min 1/3/2020   13:30      0         
11.19-5.21_15_min 1/3/2020   13:45      0         
11.19-5.21_15_min 1/3/2020   14:00      0         
11.19-5.21_15_min 1/3/2020   14:15      0         
11.19-5.21_15_min 1/3/2020   14:30      0         
11.19-5.21_15_min 1/3/2020   14:45      0         
11.19-5.21_15_min 1/3/2020   15:00      0         
11.19-5.21_15_min 1/3/2020   15:15      0         
11.19-5.21_15_min 1/3/2020   15:30      0         
11.19-5.21_15_min 1/3/2020   15:45      0         
11.19-5.21_15_min 1/3/2020   16:00      0         
11.19-5.21_15_min 1/3/2020   16:15      0         
11.19-5.21_15_min 1/3/2020   16:30      0         
11.19-5.21_15_min 1/3/2020   16:45      0         
11.19-5.21_15_min 1/3/2020   17:00      0         
11.19-5.21_15_min 1/3/2020   17:15      0         
11.19-5.21_15_min 1/3/2020   17:30      0         
11.19-5.21_15_min 1/3/2020   17:45      0         
11.19-5.21_15_min 1/3/2020   18:00      0         
11.19-5.21_15_min 1/3/2020   18:15      0         
11.19-5.21_15_min 1/3/2020   18:30      0         
11.19-5.21_15_min 1/3/2020   18:45      0         
11.19-5.21_15_min 1/3/2020   19:00      0         
11.19-5.21_15_min 1/3/2020   19:15      0         
11.19-5.21_15_min 1/3/2020   19:30      0         
11.19-5.21_15_min 1/3/2020   19:45      0         
11.19-5.21_15_min 1/3/2020   20:00      0         
11.19-5.21_15_min 1/3/2020   20:15      0         
11.19-5.21_15_min 1/3/2020   20:30      0         
11.19-5.21_15_min 1/3/2020   20:45      0         
11.19-5.21_15_min 1/3/2020   21:00      0         
11.19-5.21_15_min 1/3/2020   21:15      0         
11.19-5.21_15_min 1/3/2020   21:30      0         
11.19-5.21_15_min 1/3/2020   21:45      0         
11.19-5.21_15_min 1/3/2020   22:00      0         
11.19-5.21_15_min 1/3/2020   22:15      0         
11.19-5.21_15_min 1/3/2020   22:30      0         
11.19-5.21_15_min 1/3/2020   22:45      0         
11.19-5.21_15_min 1/3/2020   23:00      0         
11.19-5.21_15_min 1/3/2020   23:15      0         
11.19-5.21_15_min 1/3/2020   23:30      0         
11.19-5.21_15_min 1/3/2020   23:45      0         
11.19-5.21_15_min 1/4/2020   0:00       0         
11.19-5.21_15_min 1/4/2020   0:15       0         
11.19-5.21_15_min 1/4/2020   0:30       0         
11.19-5.21_15_min 1/4/2020   0:45       0         
11.19-5.21_15_min 1/4/2020   1:00       0         
11.19-5.21_15_min 1/4/2020   1:15       0         
11.19-5.21_15_min 1/4/2020   1:30       0         
11.19-5.21_15_min 1/4/2020   1:45       0         
11.19-5.21_15_min 1/4/2020   2:00       0.01      
11.19-5.21_15_min 1/4/2020   2:15       0         
11.19-5.21_15_min 1/4/2020   2:30       0         
11.19-5.21_15_min 1/4/2020   2:45       0         
11.19-5.21_15_min 1/4/2020   3:00       0         
11.19-5.21_15_min 1/4/2020   3:15       0         
11.19-5.21_15_min 1/4/2020   3:30       0         
11.19-5.21_15_min 1/4/2020   3:45       0         
11.19-5.21_15_min 1/4/2020   4:00       0         
11.19-5.21_15_min 1/4/2020   4:15       0         
11.19-5.21_15_min 1/4/2020   4:30       0         
11.19-5.21_15_min 1/4/2020   5:15       0         
11.19-5.21_15_min 1/4/2020   5:30       0.01      
11.19-5.21_15_min 1/4/2020   5:45       0         
11.19-5.21_15_min 1/4/2020   6:00       0         
11.19-5.21_15_min 1/4/2020   7:00       0         
11.19-5.21_15_min 1/4/2020   21:30      0         
11.19-5.21_15_min 1/4/2020   21:45      0         
11.19-5.21_15_min 1/4/2020   22:00      0         
11.19-5.21_15_min 1/4/2020   22:15      0         
11.19-5.21_15_min 1/4/2020   22:30      0         
11.19-5.21_15_min 1/4/2020   22:45      0         
11.19-5.21_15_min 1/4/2020   23:00      0         
11.19-5.21_15_min 1/4/2020   23:15      0         
11.19-5.21_15_min 1/4/2020   23:30      0         
11.19-5.21_15_min 1/4/2020   23:45      0         
11.19-5.21_15_min 1/5/2020   0:00       0         
11.19-5.21_15_min 1/5/2020   0:15       0         
11.19-5.21_15_min 1/5/2020   0:30       0         
11.19-5.21_15_min 1/5/2020   0:45       0         
11.19-5.21_15_min 1/5/2020   1:00       0         
11.19-5.21_15_min 1/5/2020   1:15       0.01      
11.19-5.21_15_min 1/5/2020   1:30       0         
11.19-5.21_15_min 1/5/2020   1:45       0         
11.19-5.21_15_min 1/5/2020   2:00       0.01      
11.19-5.21_15_min 1/5/2020   2:15       0         
11.19-5.21_15_min 1/5/2020   2:30       0         
11.19-5.21_15_min 1/5/2020   2:45       0         
11.19-5.21_15_min 1/5/2020   3:00       0         
11.19-5.21_15_min 1/5/2020   3:15       0         
11.19-5.21_15_min 1/5/2020   3:30       0         
11.19-5.21_15_min 1/5/2020   3:45       0.01      
11.19-5.21_15_min 1/5/2020   4:00       0         
11.19-5.21_15_min 1/5/2020   4:15       0         
11.19-5.21_15_min 1/5/2020   4:30       0         
11.19-5.21_15_min 1/5/2020   4:45       0         
11.19-5.21_15_min 1/5/2020   5:00       0         
11.19-5.21_15_min 1/5/2020   5:15       0         
11.19-5.21_15_min 1/5/2020   5:30       0         
11.19-5.21_15_min 1/5/2020   5:45       0         
11.19-5.21_15_min 1/5/2020   6:00       0         
11.19-5.21_15_min 1/5/2020   6:15       0         
11.19-5.21_15_min 1/5/2020   6:30       0         
11.19-5.21_15_min 1/5/2020   6:45       0         
11.19-5.21_15_min 1/5/2020   7:00       0         
11.19-5.21_15_min 1/5/2020   7:15       0         
11.19-5.21_15_min 1/5/2020   7:30       0         
11.19-5.21_15_min 1/5/2020   7:45       0         
11.19-5.21_15_min 1/5/2020   8:00       0         
11.19-5.21_15_min 1/5/2020   8:15       0         
11.19-5.21_15_min 1/5/2020   8:30       0         
11.19-5.21_15_min 1/5/2020   8:45       0         
11.19-5.21_15_min 1/5/2020   9:00       0         
11.19-5.21_15_min 1/5/2020   9:15       0         
11.19-5.21_15_min 1/5/2020   9:30       0         
11.19-5.21_15_min 1/5/2020   9:45       0         
11.19-5.21_15_min 1/5/2020   10:00      0         
11.19-5.21_15_min 1/5/2020   10:15      0         
11.19-5.21_15_min 1/5/2020   10:30      0         
11.19-5.21_15_min 1/5/2020   10:45      0         
11.19-5.21_15_min 1/5/2020   11:00      0         
11.19-5.21_15_min 1/5/2020   11:15      0         
11.19-5.21_15_min 1/5/2020   11:30      0         
11.19-5.21_15_min 1/5/2020   11:45      0         
11.19-5.21_15_min 1/5/2020   12:00      0         
11.19-5.21_15_min 1/5/2020   12:15      0         
11.19-5.21_15_min 1/5/2020   12:30      0         
11.19-5.21_15_min 1/5/2020   12:45      0         
11.19-5.21_15_min 1/5/2020   13:00      0         
11.19-5.21_15_min 1/5/2020   13:15      0         
11.19-5.21_15_min 1/5/2020   13:30      0         
11.19-5.21_15_min 1/5/2020   13:45      0         
11.19-5.21_15_min 1/5/2020   14:00      0         
11.19-5.21_15_min 1/5/2020   14:15      0         
11.19-5.21_15_min 1/5/2020   14:30      0         
11.19-5.21_15_min 1/5/2020   14:45      0         
11.19-5.21_15_min 1/5/2020   15:00      0         
11.19-5.21_15_min 1/5/2020   15:15      0         
11.19-5.21_15_min 1/5/2020   15:30      0         
11.19-5.21_15_min 1/5/2020   15:45      0         
11.19-5.21_15_min 1/5/2020   16:00      0         
11.19-5.21_15_min 1/5/2020   16:15      0         
11.19-5.21_15_min 1/5/2020   16:30      0         
11.19-5.21_15_min 1/5/2020   16:45      0         
11.19-5.21_15_min 1/5/2020   17:00      0         
11.19-5.21_15_min 1/5/2020   17:15      0         
11.19-5.21_15_min 1/5/2020   17:30      0         
11.19-5.21_15_min 1/5/2020   17:45      0         
11.19-5.21_15_min 1/5/2020   18:00      0         
11.19-5.21_15_min 1/5/2020   18:15      0         
11.19-5.21_15_min 1/5/2020   18:30      0         
11.19-5.21_15_min 1/5/2020   18:45      0         
11.19-5.21_15_min 1/5/2020   19:00      0         
11.19-5.21_15_min 1/5/2020   19:15      0         
11.19-5.21_15_min 1/5/2020   19:30      0         
11.19-5.21_15_min 1/5/2020   19:45      0         
11.19-5.21_15_min 1/5/2020   20:00      0         
11.19-5.21_15_min 1/5/2020   20:15      0         
11.19-5.21_15_min 1/5/2020   20:30      0         
11.19-5.21_15_min 1/5/2020   20:45      0         
11.19-5.21_15_min 1/5/2020   21:00      0         
11.19-5.21_15_min 1/5/2020   21:15      0         
11.19-5.21_15_min 1/5/2020   21:30      0         
11.19-5.21_15_min 1/5/2020   21:45      0         
11.19-5.21_15_min 1/5/2020   22:00      0         
11.19-5.21_15_min 1/5/2020   22:15      0         
11.19-5.21_15_min 1/5/2020   22:30      0         
11.19-5.21_15_min 1/5/2020   22:45      0         
11.19-5.21_15_min 1/5/2020   23:00      0         
11.19-5.21_15_min 1/5/2020   23:15      0         
11.19-5.21_15_min 1/5/2020   23:30      0         
11.19-5.21_15_min 1/5/2020   23:45      0         
11.19-5.21_15_min 1/6/2020   0:00       0         
11.19-5.21_15_min 1/6/2020   0:15       0         
11.19-5.21_15_min 1/6/2020   0:30       0         
11.19-5.21_15_min 1/6/2020   0:45       0         
11.19-5.21_15_min 1/6/2020   1:00       0         
11.19-5.21_15_min 1/6/2020   1:15       0         
11.19-5.21_15_min 1/6/2020   1:30       0         
11.19-5.21_15_min 1/6/2020   1:45       0         
11.19-5.21_15_min 1/6/2020   2:00       0         
11.19-5.21_15_min 1/6/2020   2:15       0         
11.19-5.21_15_min 1/6/2020   2:30       0         
11.19-5.21_15_min 1/6/2020   2:45       0         
11.19-5.21_15_min 1/6/2020   3:00       0         
11.19-5.21_15_min 1/6/2020   3:15       0         
11.19-5.21_15_min 1/6/2020   3:30       0         
11.19-5.21_15_min 1/6/2020   3:45       0         
11.19-5.21_15_min 1/6/2020   4:00       0         
11.19-5.21_15_min 1/6/2020   4:15       0         
11.19-5.21_15_min 1/6/2020   4:30       0         
11.19-5.21_15_min 1/6/2020   4:45       0         
11.19-5.21_15_min 1/6/2020   5:00       0         
11.19-5.21_15_min 1/6/2020   5:15       0         
11.19-5.21_15_min 1/6/2020   5:30       0         
11.19-5.21_15_min 1/6/2020   5:45       0         
11.19-5.21_15_min 1/6/2020   6:00       0         
11.19-5.21_15_min 1/6/2020   6:15       0         
11.19-5.21_15_min 1/6/2020   6:30       0         
11.19-5.21_15_min 1/6/2020   6:45       0         
11.19-5.21_15_min 1/6/2020   7:00       0         
11.19-5.21_15_min 1/6/2020   7:30       0         
11.19-5.21_15_min 1/6/2020   7:45       0         
11.19-5.21_15_min 1/6/2020   8:00       0         
11.19-5.21_15_min 1/6/2020   8:15       0         
11.19-5.21_15_min 1/6/2020   8:30       0         
11.19-5.21_15_min 1/6/2020   8:45       0         
11.19-5.21_15_min 1/6/2020   9:00       0         
11.19-5.21_15_min 1/6/2020   9:15       0         
11.19-5.21_15_min 1/6/2020   9:30       0         
11.19-5.21_15_min 1/6/2020   9:45       0         
11.19-5.21_15_min 1/6/2020   10:00      0         
11.19-5.21_15_min 1/6/2020   10:15      0         
11.19-5.21_15_min 1/6/2020   10:30      0         
11.19-5.21_15_min 1/6/2020   10:45      0         
11.19-5.21_15_min 1/6/2020   11:00      0         
11.19-5.21_15_min 1/6/2020   15:30      0         
11.19-5.21_15_min 1/6/2020   15:45      0         
11.19-5.21_15_min 1/6/2020   16:00      0         
11.19-5.21_15_min 1/6/2020   18:15      0         
11.19-5.21_15_min 1/6/2020   18:30      0         
11.19-5.21_15_min 1/6/2020   18:45      0         
11.19-5.21_15_min 1/6/2020   19:00      0         
11.19-5.21_15_min 1/6/2020   19:15      0         
11.19-5.21_15_min 1/6/2020   19:30      0         
11.19-5.21_15_min 1/6/2020   19:45      0         
11.19-5.21_15_min 1/6/2020   20:00      0         
11.19-5.21_15_min 1/6/2020   20:15      0         
11.19-5.21_15_min 1/6/2020   20:30      0         
11.19-5.21_15_min 1/6/2020   20:45      0         
11.19-5.21_15_min 1/6/2020   21:00      0         
11.19-5.21_15_min 1/6/2020   21:15      0         
11.19-5.21_15_min 1/6/2020   21:30      0         
11.19-5.21_15_min 1/6/2020   21:45      0         
11.19-5.21_15_min 1/6/2020   22:00      0         
11.19-5.21_15_min 1/6/2020   22:15      0         
11.19-5.21_15_min 1/6/2020   22:30      0         
11.19-5.21_15_min 1/6/2020   22:45      0         
11.19-5.21_15_min 1/6/2020   23:00      0         
11.19-5.21_15_min 1/6/2020   23:15      0         
11.19-5.21_15_min 1/6/2020   23:30      0         
11.19-5.21_15_min 1/6/2020   23:45      0         
11.19-5.21_15_min 1/7/2020   0:00       0         
11.19-5.21_15_min 1/7/2020   0:15       0         
11.19-5.21_15_min 1/7/2020   0:30       0         
11.19-5.21_15_min 1/7/2020   0:45       0         
11.19-5.21_15_min 1/7/2020   1:00       0         
11.19-5.21_15_min 1/7/2020   1:15       0         
11.19-5.21_15_min 1/7/2020   1:30       0         
11.19-5.21_15_min 1/7/2020   1:45       0         
11.19-5.21_15_min 1/7/2020   2:00       0         
11.19-5.21_15_min 1/7/2020   2:15       0         
11.19-5.21_15_min 1/7/2020   2:30       0         
11.19-5.21_15_min 1/7/2020   2:45       0         
11.19-5.21_15_min 1/7/2020   3:00       0         
11.19-5.21_15_min 1/7/2020   3:15       0         
11.19-5.21_15_min 1/7/2020   3:30       0         
11.19-5.21_15_min 1/7/2020   3:45       0         
11.19-5.21_15_min 1/7/2020   4:00       0         
11.19-5.21_15_min 1/7/2020   4:15       0         
11.19-5.21_15_min 1/7/2020   4:30       0         
11.19-5.21_15_min 1/7/2020   4:45       0         
11.19-5.21_15_min 1/7/2020   5:00       0         
11.19-5.21_15_min 1/7/2020   5:15       0         
11.19-5.21_15_min 1/7/2020   5:30       0         
11.19-5.21_15_min 1/7/2020   5:45       0         
11.19-5.21_15_min 1/7/2020   6:00       0         
11.19-5.21_15_min 1/7/2020   6:15       0         
11.19-5.21_15_min 1/7/2020   6:30       0         
11.19-5.21_15_min 1/7/2020   7:15       0         
11.19-5.21_15_min 1/7/2020   7:30       0         
11.19-5.21_15_min 1/7/2020   7:45       0         
11.19-5.21_15_min 1/7/2020   8:00       0         
11.19-5.21_15_min 1/7/2020   8:15       0         
11.19-5.21_15_min 1/7/2020   8:30       0         
11.19-5.21_15_min 1/7/2020   8:45       0         
11.19-5.21_15_min 1/7/2020   9:00       0         
11.19-5.21_15_min 1/7/2020   9:15       0         
11.19-5.21_15_min 1/7/2020   9:30       0         
11.19-5.21_15_min 1/7/2020   9:45       0         
11.19-5.21_15_min 1/7/2020   10:00      0         
11.19-5.21_15_min 1/7/2020   10:15      0         
11.19-5.21_15_min 1/7/2020   10:30      0         
11.19-5.21_15_min 1/7/2020   10:45      0         
11.19-5.21_15_min 1/7/2020   11:00      0         
11.19-5.21_15_min 1/7/2020   11:15      0         
11.19-5.21_15_min 1/7/2020   11:30      0         
11.19-5.21_15_min 1/7/2020   11:45      0         
11.19-5.21_15_min 1/7/2020   12:00      0         
11.19-5.21_15_min 1/7/2020   12:15      0         
11.19-5.21_15_min 1/7/2020   12:30      0         
11.19-5.21_15_min 1/7/2020   12:45      0         
11.19-5.21_15_min 1/7/2020   13:00      0         
11.19-5.21_15_min 1/7/2020   13:15      0         
11.19-5.21_15_min 1/7/2020   13:30      0         
11.19-5.21_15_min 1/7/2020   13:45      0         
11.19-5.21_15_min 1/7/2020   14:00      0         
11.19-5.21_15_min 1/7/2020   14:15      0         
11.19-5.21_15_min 1/7/2020   14:30      0         
11.19-5.21_15_min 1/7/2020   14:45      0         
11.19-5.21_15_min 1/7/2020   15:00      0         
11.19-5.21_15_min 1/7/2020   15:15      0         
11.19-5.21_15_min 1/7/2020   15:30      0         
11.19-5.21_15_min 1/7/2020   15:45      0         
11.19-5.21_15_min 1/7/2020   16:00      0         
11.19-5.21_15_min 1/7/2020   16:30      0         
11.19-5.21_15_min 1/7/2020   16:45      0         
11.19-5.21_15_min 1/7/2020   17:00      0         
11.19-5.21_15_min 1/7/2020   17:15      0         
11.19-5.21_15_min 1/7/2020   17:30      0         
11.19-5.21_15_min 1/7/2020   17:45      0         
11.19-5.21_15_min 1/7/2020   18:00      0         
11.19-5.21_15_min 1/7/2020   18:15      0         
11.19-5.21_15_min 1/7/2020   18:30      0         
11.19-5.21_15_min 1/7/2020   18:45      0         
11.19-5.21_15_min 1/7/2020   19:00      0         
11.19-5.21_15_min 1/7/2020   19:15      0         
11.19-5.21_15_min 1/7/2020   19:30      0         
11.19-5.21_15_min 1/7/2020   19:45      0         
11.19-5.21_15_min 1/7/2020   20:00      0         
11.19-5.21_15_min 1/7/2020   20:15      0         
11.19-5.21_15_min 1/7/2020   20:30      0         
11.19-5.21_15_min 1/7/2020   20:45      0         
11.19-5.21_15_min 1/7/2020   21:00      0         
11.19-5.21_15_min 1/7/2020   21:15      0         
11.19-5.21_15_min 1/7/2020   21:30      0         
11.19-5.21_15_min 1/7/2020   21:45      0         
11.19-5.21_15_min 1/7/2020   22:00      0         
11.19-5.21_15_min 1/7/2020   22:15      0         
11.19-5.21_15_min 1/7/2020   22:30      0         
11.19-5.21_15_min 1/7/2020   22:45      0         
11.19-5.21_15_min 1/8/2020   0:15       0         
11.19-5.21_15_min 1/8/2020   0:30       0         
11.19-5.21_15_min 1/8/2020   0:45       0         
11.19-5.21_15_min 1/8/2020   1:00       0         
11.19-5.21_15_min 1/8/2020   1:15       0         
11.19-5.21_15_min 1/8/2020   1:30       0         
11.19-5.21_15_min 1/8/2020   1:45       0         
11.19-5.21_15_min 1/8/2020   2:00       0         
11.19-5.21_15_min 1/8/2020   2:15       0         
11.19-5.21_15_min 1/8/2020   2:30       0         
11.19-5.21_15_min 1/8/2020   2:45       0         
11.19-5.21_15_min 1/8/2020   3:00       0         
11.19-5.21_15_min 1/8/2020   3:15       0         
11.19-5.21_15_min 1/8/2020   3:30       0         
11.19-5.21_15_min 1/8/2020   3:45       0         
11.19-5.21_15_min 1/8/2020   4:15       0         
11.19-5.21_15_min 1/8/2020   4:45       0         
11.19-5.21_15_min 1/8/2020   5:00       0         
11.19-5.21_15_min 1/8/2020   5:15       0         
11.19-5.21_15_min 1/8/2020   5:30       0         
11.19-5.21_15_min 1/8/2020   5:45       0         
11.19-5.21_15_min 1/8/2020   6:00       0         
11.19-5.21_15_min 1/8/2020   6:15       0         
11.19-5.21_15_min 1/8/2020   6:30       0         
11.19-5.21_15_min 1/8/2020   7:30       0         
11.19-5.21_15_min 1/8/2020   7:45       0         
11.19-5.21_15_min 1/8/2020   8:00       0         
11.19-5.21_15_min 1/8/2020   8:15       0         
11.19-5.21_15_min 1/8/2020   8:30       0         
11.19-5.21_15_min 1/8/2020   8:45       0         
11.19-5.21_15_min 1/8/2020   9:00       0         
11.19-5.21_15_min 1/8/2020   9:15       0         
11.19-5.21_15_min 1/8/2020   9:30       0         
11.19-5.21_15_min 1/8/2020   9:45       0         
11.19-5.21_15_min 1/8/2020   10:00      0         
11.19-5.21_15_min 1/8/2020   10:15      0         
11.19-5.21_15_min 1/8/2020   10:30      0         
11.19-5.21_15_min 1/8/2020   10:45      0         
11.19-5.21_15_min 1/8/2020   11:00      0         
11.19-5.21_15_min 1/8/2020   11:15      0         
11.19-5.21_15_min 1/8/2020   11:30      0         
11.19-5.21_15_min 1/8/2020   11:45      0         
11.19-5.21_15_min 1/8/2020   12:00      0         
11.19-5.21_15_min 1/8/2020   12:15      0         
11.19-5.21_15_min 1/8/2020   12:30      0         
11.19-5.21_15_min 1/8/2020   12:45      0         
11.19-5.21_15_min 1/8/2020   13:00      0         
11.19-5.21_15_min 1/8/2020   13:15      0         
11.19-5.21_15_min 1/8/2020   13:30      0         
11.19-5.21_15_min 1/8/2020   13:45      0         
11.19-5.21_15_min 1/8/2020   14:00      0         
11.19-5.21_15_min 1/8/2020   14:15      0         
11.19-5.21_15_min 1/8/2020   14:30      0         
11.19-5.21_15_min 1/8/2020   14:45      0         
11.19-5.21_15_min 1/8/2020   15:00      0         
11.19-5.21_15_min 1/8/2020   15:15      0         
11.19-5.21_15_min 1/8/2020   15:30      0         
11.19-5.21_15_min 1/8/2020   15:45      0         
11.19-5.21_15_min 1/8/2020   16:00      0         
11.19-5.21_15_min 1/8/2020   16:15      0         
11.19-5.21_15_min 1/8/2020   16:30      0         
11.19-5.21_15_min 1/8/2020   16:45      0         
11.19-5.21_15_min 1/8/2020   17:00      0         
11.19-5.21_15_min 1/8/2020   17:15      0         
11.19-5.21_15_min 1/8/2020   17:30      0         
11.19-5.21_15_min 1/8/2020   17:45      0         
11.19-5.21_15_min 1/8/2020   18:00      0         
11.19-5.21_15_min 1/8/2020   18:15      0         
11.19-5.21_15_min 1/8/2020   18:30      0         
11.19-5.21_15_min 1/8/2020   18:45      0         
11.19-5.21_15_min 1/8/2020   19:00      0         
11.19-5.21_15_min 1/8/2020   19:15      0         
11.19-5.21_15_min 1/8/2020   19:30      0         
11.19-5.21_15_min 1/8/2020   19:45      0         
11.19-5.21_15_min 1/8/2020   20:00      0         
11.19-5.21_15_min 1/8/2020   20:15      0         
11.19-5.21_15_min 1/8/2020   20:30      0         
11.19-5.21_15_min 1/8/2020   20:45      0         
11.19-5.21_15_min 1/8/2020   21:00      0         
11.19-5.21_15_min 1/8/2020   21:15      0         
11.19-5.21_15_min 1/8/2020   21:30      0         
11.19-5.21_15_min 1/8/2020   21:45      0         
11.19-5.21_15_min 1/8/2020   22:00      0         
11.19-5.21_15_min 1/8/2020   22:15      0         
11.19-5.21_15_min 1/8/2020   22:30      0         
11.19-5.21_15_min 1/8/2020   22:45      0         
11.19-5.21_15_min 1/8/2020   23:00      0         
11.19-5.21_15_min 1/8/2020   23:15      0         
11.19-5.21_15_min 1/8/2020   23:30      0         
11.19-5.21_15_min 1/8/2020   23:45      0         
11.19-5.21_15_min 1/9/2020   0:00       0         
11.19-5.21_15_min 1/9/2020   0:15       0         
11.19-5.21_15_min 1/9/2020   0:30       0         
11.19-5.21_15_min 1/9/2020   0:45       0         
11.19-5.21_15_min 1/9/2020   1:00       0         
11.19-5.21_15_min 1/9/2020   1:15       0         
11.19-5.21_15_min 1/9/2020   1:30       0         
11.19-5.21_15_min 1/9/2020   1:45       0         
11.19-5.21_15_min 1/9/2020   2:00       0         
11.19-5.21_15_min 1/9/2020   2:15       0         
11.19-5.21_15_min 1/9/2020   2:30       0         
11.19-5.21_15_min 1/9/2020   2:45       0         
11.19-5.21_15_min 1/9/2020   3:00       0         
11.19-5.21_15_min 1/9/2020   3:15       0         
11.19-5.21_15_min 1/9/2020   3:30       0         
11.19-5.21_15_min 1/9/2020   3:45       0         
11.19-5.21_15_min 1/9/2020   4:00       0         
11.19-5.21_15_min 1/9/2020   4:15       0         
11.19-5.21_15_min 1/9/2020   4:30       0         
11.19-5.21_15_min 1/9/2020   4:45       0         
11.19-5.21_15_min 1/9/2020   5:00       0         
11.19-5.21_15_min 1/9/2020   5:15       0         
11.19-5.21_15_min 1/9/2020   5:30       0         
11.19-5.21_15_min 1/9/2020   5:45       0         
11.19-5.21_15_min 1/9/2020   6:00       0         
11.19-5.21_15_min 1/9/2020   6:15       0         
11.19-5.21_15_min 1/9/2020   6:30       0         
11.19-5.21_15_min 1/9/2020   6:45       0         
11.19-5.21_15_min 1/9/2020   7:00       0         
11.19-5.21_15_min 1/9/2020   7:15       0         
11.19-5.21_15_min 1/9/2020   7:30       0         
11.19-5.21_15_min 1/9/2020   7:45       0         
11.19-5.21_15_min 1/9/2020   8:00       0         
11.19-5.21_15_min 1/9/2020   8:15       0         
11.19-5.21_15_min 1/9/2020   8:30       0         
11.19-5.21_15_min 1/9/2020   8:45       0         
11.19-5.21_15_min 1/9/2020   9:00       0         
11.19-5.21_15_min 1/9/2020   9:45       0         
11.19-5.21_15_min 1/9/2020   10:00      0         
11.19-5.21_15_min 1/9/2020   10:15      0         
11.19-5.21_15_min 1/9/2020   12:00      0         
11.19-5.21_15_min 1/9/2020   13:15      0         
11.19-5.21_15_min 1/9/2020   13:30      0         
11.19-5.21_15_min 1/9/2020   13:45      0         
11.19-5.21_15_min 1/9/2020   14:45      0         
11.19-5.21_15_min 1/9/2020   15:00      0         
11.19-5.21_15_min 1/9/2020   15:30      0         
11.19-5.21_15_min 1/9/2020   15:45      0         
11.19-5.21_15_min 1/9/2020   16:00      0         
11.19-5.21_15_min 1/9/2020   16:30      0         
11.19-5.21_15_min 1/9/2020   16:45      0         
11.19-5.21_15_min 1/9/2020   17:15      0         
11.19-5.21_15_min 1/9/2020   17:30      0         
11.19-5.21_15_min 1/9/2020   17:45      0         
11.19-5.21_15_min 1/9/2020   18:00      0         
11.19-5.21_15_min 1/9/2020   18:15      0         
11.19-5.21_15_min 1/9/2020   18:30      0         
11.19-5.21_15_min 1/9/2020   18:45      0         
11.19-5.21_15_min 1/9/2020   19:00      0         
11.19-5.21_15_min 1/9/2020   19:15      0         
11.19-5.21_15_min 1/9/2020   19:30      0         
11.19-5.21_15_min 1/9/2020   19:45      0         
11.19-5.21_15_min 1/9/2020   20:00      0         
11.19-5.21_15_min 1/9/2020   20:15      0         
11.19-5.21_15_min 1/9/2020   20:30      0         
11.19-5.21_15_min 1/9/2020   20:45      0         
11.19-5.21_15_min 1/9/2020   21:00      0         
11.19-5.21_15_min 1/9/2020   21:15      0         
11.19-5.21_15_min 1/9/2020   21:30      0         
11.19-5.21_15_min 1/9/2020   21:45      0         
11.19-5.21_15_min 1/9/2020   22:00      0         
11.19-5.21_15_min 1/9/2020   22:15      0         
11.19-5.21_15_min 1/9/2020   22:30      0         
11.19-5.21_15_min 1/9/2020   22:45      0         
11.19-5.21_15_min 1/9/2020   23:00      0         
11.19-5.21_15_min 1/9/2020   23:15      0         
11.19-5.21_15_min 1/9/2020   23:30      0         
11.19-5.21_15_min 1/9/2020   23:45      0         
11.19-5.21_15_min 1/10/2020  0:00       0         
11.19-5.21_15_min 1/10/2020  0:15       0         
11.19-5.21_15_min 1/10/2020  0:30       0         
11.19-5.21_15_min 1/10/2020  0:45       0         
11.19-5.21_15_min 1/10/2020  1:00       0         
11.19-5.21_15_min 1/10/2020  1:15       0         
11.19-5.21_15_min 1/10/2020  1:30       0         
11.19-5.21_15_min 1/10/2020  1:45       0         
11.19-5.21_15_min 1/10/2020  2:00       0         
11.19-5.21_15_min 1/10/2020  2:15       0         
11.19-5.21_15_min 1/10/2020  2:30       0         
11.19-5.21_15_min 1/10/2020  2:45       0         
11.19-5.21_15_min 1/10/2020  3:00       0         
11.19-5.21_15_min 1/10/2020  3:15       0         
11.19-5.21_15_min 1/10/2020  3:30       0         
11.19-5.21_15_min 1/10/2020  3:45       0         
11.19-5.21_15_min 1/10/2020  4:00       0         
11.19-5.21_15_min 1/10/2020  4:15       0         
11.19-5.21_15_min 1/10/2020  4:30       0         
11.19-5.21_15_min 1/10/2020  4:45       0         
11.19-5.21_15_min 1/10/2020  5:00       0         
11.19-5.21_15_min 1/10/2020  5:15       0         
11.19-5.21_15_min 1/10/2020  5:30       0         
11.19-5.21_15_min 1/10/2020  5:45       0         
11.19-5.21_15_min 1/10/2020  6:00       0         
11.19-5.21_15_min 1/10/2020  6:15       0         
11.19-5.21_15_min 1/10/2020  6:30       0         
11.19-5.21_15_min 1/10/2020  6:45       0         
11.19-5.21_15_min 1/10/2020  7:00       0         
11.19-5.21_15_min 1/10/2020  7:15       0         
11.19-5.21_15_min 1/10/2020  7:30       0         
11.19-5.21_15_min 1/10/2020  7:45       0         
11.19-5.21_15_min 1/10/2020  8:00       0         
11.19-5.21_15_min 1/10/2020  8:15       0         
11.19-5.21_15_min 1/10/2020  8:30       0         
11.19-5.21_15_min 1/10/2020  8:45       0         
11.19-5.21_15_min 1/10/2020  9:00       0         
11.19-5.21_15_min 1/10/2020  9:15       0         
11.19-5.21_15_min 1/10/2020  9:30       0         
11.19-5.21_15_min 1/10/2020  9:45       0         
11.19-5.21_15_min 1/10/2020  10:00      0         
11.19-5.21_15_min 1/10/2020  10:15      0         
11.19-5.21_15_min 1/10/2020  10:30      0         
11.19-5.21_15_min 1/10/2020  10:45      0         
11.19-5.21_15_min 1/10/2020  11:15      0         
11.19-5.21_15_min 1/10/2020  11:30      0         
11.19-5.21_15_min 1/10/2020  11:45      0         
11.19-5.21_15_min 1/10/2020  12:00      0         
11.19-5.21_15_min 1/10/2020  12:15      0         
11.19-5.21_15_min 1/10/2020  12:30      0         
11.19-5.21_15_min 1/10/2020  12:45      0         
11.19-5.21_15_min 1/10/2020  14:30      0         
11.19-5.21_15_min 1/10/2020  15:15      0         
11.19-5.21_15_min 1/10/2020  15:30      0         
11.19-5.21_15_min 1/10/2020  15:45      0         
11.19-5.21_15_min 1/10/2020  16:00      0         
11.19-5.21_15_min 1/10/2020  16:15      0         
11.19-5.21_15_min 1/10/2020  16:30      0         
11.19-5.21_15_min 1/10/2020  16:45      0         
11.19-5.21_15_min 1/10/2020  17:00      0         
11.19-5.21_15_min 1/10/2020  17:15      0         
11.19-5.21_15_min 1/10/2020  17:30      0         
11.19-5.21_15_min 1/10/2020  17:45      0         
11.19-5.21_15_min 1/10/2020  18:00      0         
11.19-5.21_15_min 1/10/2020  18:15      0         
11.19-5.21_15_min 1/10/2020  18:30      0         
11.19-5.21_15_min 1/10/2020  18:45      0         
11.19-5.21_15_min 1/10/2020  19:00      0         
11.19-5.21_15_min 1/10/2020  19:15      0         
11.19-5.21_15_min 1/10/2020  19:30      0         
11.19-5.21_15_min 1/10/2020  19:45      0         
11.19-5.21_15_min 1/10/2020  20:00      0         
11.19-5.21_15_min 1/10/2020  20:15      0         
11.19-5.21_15_min 1/10/2020  20:30      0         
11.19-5.21_15_min 1/10/2020  20:45      0         
11.19-5.21_15_min 1/10/2020  21:00      0         
11.19-5.21_15_min 1/10/2020  21:15      0         
11.19-5.21_15_min 1/10/2020  21:30      0         
11.19-5.21_15_min 1/10/2020  21:45      0         
11.19-5.21_15_min 1/10/2020  22:00      0         
11.19-5.21_15_min 1/10/2020  22:15      0         
11.19-5.21_15_min 1/10/2020  22:30      0         
11.19-5.21_15_min 1/10/2020  22:45      0         
11.19-5.21_15_min 1/10/2020  23:00      0         
11.19-5.21_15_min 1/10/2020  23:15      0         
11.19-5.21_15_min 1/10/2020  23:30      0         
11.19-5.21_15_min 1/10/2020  23:45      0         
11.19-5.21_15_min 1/11/2020  0:00       0         
11.19-5.21_15_min 1/11/2020  0:15       0         
11.19-5.21_15_min 1/11/2020  0:30       0         
11.19-5.21_15_min 1/11/2020  0:45       0         
11.19-5.21_15_min 1/11/2020  1:00       0         
11.19-5.21_15_min 1/11/2020  1:15       0         
11.19-5.21_15_min 1/11/2020  1:30       0         
11.19-5.21_15_min 1/11/2020  1:45       0         
11.19-5.21_15_min 1/11/2020  2:00       0         
11.19-5.21_15_min 1/11/2020  2:15       0         
11.19-5.21_15_min 1/11/2020  2:30       0         
11.19-5.21_15_min 1/11/2020  2:45       0         
11.19-5.21_15_min 1/11/2020  3:00       0         
11.19-5.21_15_min 1/11/2020  3:15       0         
11.19-5.21_15_min 1/11/2020  3:30       0         
11.19-5.21_15_min 1/11/2020  3:45       0         
11.19-5.21_15_min 1/11/2020  4:00       0         
11.19-5.21_15_min 1/11/2020  4:15       0         
11.19-5.21_15_min 1/11/2020  4:30       0         
11.19-5.21_15_min 1/11/2020  4:45       0         
11.19-5.21_15_min 1/11/2020  5:00       0         
11.19-5.21_15_min 1/11/2020  5:15       0         
11.19-5.21_15_min 1/11/2020  5:30       0         
11.19-5.21_15_min 1/11/2020  5:45       0         
11.19-5.21_15_min 1/11/2020  6:00       0         
11.19-5.21_15_min 1/11/2020  6:15       0         
11.19-5.21_15_min 1/11/2020  6:30       0         
11.19-5.21_15_min 1/11/2020  6:45       0         
11.19-5.21_15_min 1/11/2020  7:00       0         
11.19-5.21_15_min 1/11/2020  7:15       0         
11.19-5.21_15_min 1/11/2020  7:30       0         
11.19-5.21_15_min 1/11/2020  7:45       0         
11.19-5.21_15_min 1/11/2020  8:00       0         
11.19-5.21_15_min 1/11/2020  8:15       0         
11.19-5.21_15_min 1/11/2020  8:30       0         
11.19-5.21_15_min 1/11/2020  8:45       0         
11.19-5.21_15_min 1/11/2020  9:00       0         
11.19-5.21_15_min 1/11/2020  9:15       0         
11.19-5.21_15_min 1/11/2020  9:30       0         
11.19-5.21_15_min 1/11/2020  9:45       0         
11.19-5.21_15_min 1/11/2020  10:00      0         
11.19-5.21_15_min 1/11/2020  10:15      0         
11.19-5.21_15_min 1/11/2020  10:30      0         
11.19-5.21_15_min 1/11/2020  10:45      0         
11.19-5.21_15_min 1/11/2020  11:00      0         
11.19-5.21_15_min 1/11/2020  11:15      0         
11.19-5.21_15_min 1/11/2020  11:30      0         
11.19-5.21_15_min 1/11/2020  11:45      0         
11.19-5.21_15_min 1/11/2020  12:00      0         
11.19-5.21_15_min 1/11/2020  12:15      0         
11.19-5.21_15_min 1/11/2020  12:30      0         
11.19-5.21_15_min 1/11/2020  12:45      0         
11.19-5.21_15_min 1/11/2020  13:00      0         
11.19-5.21_15_min 1/11/2020  13:15      0         
11.19-5.21_15_min 1/11/2020  13:30      0         
11.19-5.21_15_min 1/11/2020  13:45      0         
11.19-5.21_15_min 1/11/2020  14:00      0         
11.19-5.21_15_min 1/11/2020  14:15      0         
11.19-5.21_15_min 1/11/2020  14:30      0         
11.19-5.21_15_min 1/11/2020  14:45      0         
11.19-5.21_15_min 1/11/2020  15:00      0         
11.19-5.21_15_min 1/11/2020  15:15      0         
11.19-5.21_15_min 1/11/2020  15:30      0         
11.19-5.21_15_min 1/11/2020  15:45      0         
11.19-5.21_15_min 1/11/2020  16:00      0         
11.19-5.21_15_min 1/11/2020  16:15      0         
11.19-5.21_15_min 1/11/2020  16:30      0         
11.19-5.21_15_min 1/11/2020  16:45      0         
11.19-5.21_15_min 1/11/2020  17:00      0         
11.19-5.21_15_min 1/11/2020  17:15      0         
11.19-5.21_15_min 1/11/2020  17:30      0         
11.19-5.21_15_min 1/11/2020  17:45      0         
11.19-5.21_15_min 1/11/2020  18:00      0         
11.19-5.21_15_min 1/11/2020  18:15      0         
11.19-5.21_15_min 1/11/2020  18:30      0         
11.19-5.21_15_min 1/11/2020  18:45      0         
11.19-5.21_15_min 1/11/2020  19:00      0         
11.19-5.21_15_min 1/11/2020  19:15      0         
11.19-5.21_15_min 1/11/2020  19:30      0         
11.19-5.21_15_min 1/11/2020  19:45      0         
11.19-5.21_15_min 1/11/2020  20:00      0         
11.19-5.21_15_min 1/11/2020  20:15      0         
11.19-5.21_15_min 1/11/2020  20:30      0         
11.19-5.21_15_min 1/11/2020  20:45      0         
11.19-5.21_15_min 1/11/2020  21:00      0         
11.19-5.21_15_min 1/11/2020  21:15      0         
11.19-5.21_15_min 1/11/2020  21:30      0         
11.19-5.21_15_min 1/11/2020  21:45      0         
11.19-5.21_15_min 1/11/2020  22:00      0         
11.19-5.21_15_min 1/11/2020  22:15      0         
11.19-5.21_15_min 1/11/2020  22:30      0         
11.19-5.21_15_min 1/11/2020  22:45      0         
11.19-5.21_15_min 1/11/2020  23:00      0         
11.19-5.21_15_min 1/11/2020  23:15      0         
11.19-5.21_15_min 1/11/2020  23:30      0         
11.19-5.21_15_min 1/11/2020  23:45      0         
11.19-5.21_15_min 1/12/2020  0:00       0         
11.19-5.21_15_min 1/12/2020  0:15       0         
11.19-5.21_15_min 1/12/2020  0:30       0         
11.19-5.21_15_min 1/12/2020  0:45       0         
11.19-5.21_15_min 1/12/2020  1:00       0         
11.19-5.21_15_min 1/12/2020  1:15       0         
11.19-5.21_15_min 1/12/2020  1:30       0         
11.19-5.21_15_min 1/12/2020  1:45       0         
11.19-5.21_15_min 1/12/2020  2:00       0         
11.19-5.21_15_min 1/12/2020  2:15       0.01      
11.19-5.21_15_min 1/12/2020  2:30       0         
11.19-5.21_15_min 1/12/2020  2:45       0         
11.19-5.21_15_min 1/12/2020  3:00       0         
11.19-5.21_15_min 1/12/2020  3:15       0.05      
11.19-5.21_15_min 1/12/2020  3:30       0.04      
11.19-5.21_15_min 1/12/2020  3:45       0.03      
11.19-5.21_15_min 1/12/2020  4:00       0.03      
11.19-5.21_15_min 1/12/2020  4:15       0.05      
11.19-5.21_15_min 1/12/2020  4:30       0.02      
11.19-5.21_15_min 1/12/2020  4:45       0         
11.19-5.21_15_min 1/12/2020  5:00       0.02      
11.19-5.21_15_min 1/12/2020  5:15       0         
11.19-5.21_15_min 1/12/2020  5:30       0         
11.19-5.21_15_min 1/12/2020  5:45       0.02      
11.19-5.21_15_min 1/12/2020  6:00       0         
11.19-5.21_15_min 1/12/2020  6:15       0         
11.19-5.21_15_min 1/12/2020  6:30       0         
11.19-5.21_15_min 1/12/2020  6:45       0         
11.19-5.21_15_min 1/12/2020  7:00       0         
11.19-5.21_15_min 1/12/2020  7:15       0         
11.19-5.21_15_min 1/12/2020  7:30       0         
11.19-5.21_15_min 1/12/2020  7:45       0         
11.19-5.21_15_min 1/12/2020  8:00       0.02      
11.19-5.21_15_min 1/12/2020  8:15       0         
11.19-5.21_15_min 1/12/2020  8:30       0.03      
11.19-5.21_15_min 1/12/2020  8:45       0.01      
11.19-5.21_15_min 1/12/2020  9:00       0.01      
11.19-5.21_15_min 1/12/2020  9:15       0         
11.19-5.21_15_min 1/12/2020  9:30       0         
11.19-5.21_15_min 1/12/2020  9:45       0         
11.19-5.21_15_min 1/12/2020  10:00      0         
11.19-5.21_15_min 1/12/2020  10:15      0         
11.19-5.21_15_min 1/12/2020  10:30      0         
11.19-5.21_15_min 1/12/2020  10:45      0         
11.19-5.21_15_min 1/12/2020  11:00      0         
11.19-5.21_15_min 1/12/2020  11:15      0         
11.19-5.21_15_min 1/12/2020  11:30      0         
11.19-5.21_15_min 1/12/2020  11:45      0         
11.19-5.21_15_min 1/12/2020  12:00      0         
11.19-5.21_15_min 1/12/2020  12:15      0         
11.19-5.21_15_min 1/12/2020  12:30      0         
11.19-5.21_15_min 1/12/2020  12:45      0         
11.19-5.21_15_min 1/12/2020  13:00      0         
11.19-5.21_15_min 1/12/2020  13:15      0         
11.19-5.21_15_min 1/12/2020  13:30      0         
11.19-5.21_15_min 1/12/2020  13:45      0         
11.19-5.21_15_min 1/12/2020  14:00      0         
11.19-5.21_15_min 1/12/2020  14:15      0         
11.19-5.21_15_min 1/12/2020  14:30      0         
11.19-5.21_15_min 1/12/2020  14:45      0         
11.19-5.21_15_min 1/12/2020  15:00      0         
11.19-5.21_15_min 1/12/2020  15:15      0         
11.19-5.21_15_min 1/12/2020  15:30      0         
11.19-5.21_15_min 1/12/2020  15:45      0         
11.19-5.21_15_min 1/12/2020  16:00      0         
11.19-5.21_15_min 1/12/2020  16:15      0         
11.19-5.21_15_min 1/12/2020  16:30      0         
11.19-5.21_15_min 1/12/2020  16:45      0         
11.19-5.21_15_min 1/12/2020  17:00      0         
11.19-5.21_15_min 1/12/2020  17:15      0         
11.19-5.21_15_min 1/12/2020  17:30      0         
11.19-5.21_15_min 1/12/2020  17:45      0         
11.19-5.21_15_min 1/12/2020  18:00      0         
11.19-5.21_15_min 1/12/2020  18:15      0         
11.19-5.21_15_min 1/12/2020  18:30      0         
11.19-5.21_15_min 1/12/2020  18:45      0         
11.19-5.21_15_min 1/12/2020  19:00      0         
11.19-5.21_15_min 1/12/2020  19:15      0         
11.19-5.21_15_min 1/12/2020  19:30      0         
11.19-5.21_15_min 1/12/2020  19:45      0         
11.19-5.21_15_min 1/12/2020  20:00      0         
11.19-5.21_15_min 1/12/2020  20:15      0         
11.19-5.21_15_min 1/12/2020  20:30      0         
11.19-5.21_15_min 1/12/2020  20:45      0         
11.19-5.21_15_min 1/12/2020  21:00      0         
11.19-5.21_15_min 1/12/2020  21:15      0         
11.19-5.21_15_min 1/12/2020  21:30      0         
11.19-5.21_15_min 1/12/2020  21:45      0         
11.19-5.21_15_min 1/12/2020  22:00      0         
11.19-5.21_15_min 1/12/2020  22:15      0         
11.19-5.21_15_min 1/12/2020  22:30      0         
11.19-5.21_15_min 1/12/2020  23:00      0         
11.19-5.21_15_min 1/12/2020  23:45      0         
11.19-5.21_15_min 1/13/2020  0:00       0         
11.19-5.21_15_min 1/13/2020  0:15       0         
11.19-5.21_15_min 1/13/2020  0:30       0         
11.19-5.21_15_min 1/13/2020  0:45       0         
11.19-5.21_15_min 1/13/2020  1:00       0         
11.19-5.21_15_min 1/13/2020  1:15       0         
11.19-5.21_15_min 1/13/2020  1:30       0         
11.19-5.21_15_min 1/13/2020  1:45       0         
11.19-5.21_15_min 1/13/2020  2:00       0         
11.19-5.21_15_min 1/13/2020  2:15       0         
11.19-5.21_15_min 1/13/2020  2:30       0         
11.19-5.21_15_min 1/13/2020  2:45       0         
11.19-5.21_15_min 1/13/2020  3:00       0         
11.19-5.21_15_min 1/13/2020  3:15       0         
11.19-5.21_15_min 1/13/2020  3:30       0         
11.19-5.21_15_min 1/13/2020  3:45       0         
11.19-5.21_15_min 1/13/2020  4:00       0         
11.19-5.21_15_min 1/13/2020  4:15       0         
11.19-5.21_15_min 1/13/2020  4:30       0         
11.19-5.21_15_min 1/13/2020  4:45       0         
11.19-5.21_15_min 1/13/2020  5:00       0         
11.19-5.21_15_min 1/13/2020  5:15       0         
11.19-5.21_15_min 1/13/2020  5:45       0         
11.19-5.21_15_min 1/13/2020  6:00       0         
11.19-5.21_15_min 1/13/2020  6:15       0         
11.19-5.21_15_min 1/13/2020  6:30       0         
11.19-5.21_15_min 1/13/2020  6:45       0         
11.19-5.21_15_min 1/13/2020  7:00       0         
11.19-5.21_15_min 1/13/2020  7:15       0         
11.19-5.21_15_min 1/13/2020  7:30       0         
11.19-5.21_15_min 1/13/2020  7:45       0         
11.19-5.21_15_min 1/13/2020  8:00       0         
11.19-5.21_15_min 1/13/2020  8:15       0         
11.19-5.21_15_min 1/13/2020  8:30       0         
11.19-5.21_15_min 1/13/2020  8:45       0         
11.19-5.21_15_min 1/13/2020  9:00       0         
11.19-5.21_15_min 1/13/2020  9:15       0         
11.19-5.21_15_min 1/13/2020  9:30       0         
11.19-5.21_15_min 1/13/2020  9:45       0         
11.19-5.21_15_min 1/13/2020  10:00      0         
11.19-5.21_15_min 1/13/2020  10:15      0         
11.19-5.21_15_min 1/13/2020  10:30      0         
11.19-5.21_15_min 1/13/2020  10:45      0         
11.19-5.21_15_min 1/13/2020  11:00      0         
11.19-5.21_15_min 1/13/2020  11:15      0         
11.19-5.21_15_min 1/13/2020  11:30      0         
11.19-5.21_15_min 1/13/2020  11:45      0         
11.19-5.21_15_min 1/13/2020  12:00      0         
11.19-5.21_15_min 1/13/2020  12:15      0         
11.19-5.21_15_min 1/13/2020  12:30      0         
11.19-5.21_15_min 1/13/2020  12:45      0         
11.19-5.21_15_min 1/13/2020  13:00      0         
11.19-5.21_15_min 1/13/2020  13:15      0         
11.19-5.21_15_min 1/13/2020  13:30      0         
11.19-5.21_15_min 1/13/2020  13:45      0         
11.19-5.21_15_min 1/13/2020  14:00      0         
11.19-5.21_15_min 1/13/2020  14:15      0         
11.19-5.21_15_min 1/13/2020  14:30      0         
11.19-5.21_15_min 1/13/2020  14:45      0         
11.19-5.21_15_min 1/13/2020  15:00      0         
11.19-5.21_15_min 1/13/2020  15:15      0         
11.19-5.21_15_min 1/13/2020  15:30      0         
11.19-5.21_15_min 1/13/2020  15:45      0         
11.19-5.21_15_min 1/13/2020  16:00      0         
11.19-5.21_15_min 1/13/2020  16:15      0         
11.19-5.21_15_min 1/13/2020  16:30      0         
11.19-5.21_15_min 1/13/2020  16:45      0         
11.19-5.21_15_min 1/13/2020  17:00      0         
11.19-5.21_15_min 1/13/2020  17:15      0         
11.19-5.21_15_min 1/13/2020  17:30      0         
11.19-5.21_15_min 1/13/2020  17:45      0         
11.19-5.21_15_min 1/13/2020  18:00      0         
11.19-5.21_15_min 1/13/2020  18:15      0         
11.19-5.21_15_min 1/13/2020  18:30      0         
11.19-5.21_15_min 1/13/2020  18:45      0         
11.19-5.21_15_min 1/13/2020  19:00      0         
11.19-5.21_15_min 1/13/2020  19:15      0         
11.19-5.21_15_min 1/13/2020  19:30      0         
11.19-5.21_15_min 1/13/2020  19:45      0         
11.19-5.21_15_min 1/13/2020  20:00      0         
11.19-5.21_15_min 1/13/2020  20:15      0         
11.19-5.21_15_min 1/13/2020  20:30      0         
11.19-5.21_15_min 1/13/2020  20:45      0         
11.19-5.21_15_min 1/13/2020  21:00      0         
11.19-5.21_15_min 1/13/2020  21:15      0         
11.19-5.21_15_min 1/13/2020  21:30      0         
11.19-5.21_15_min 1/13/2020  21:45      0         
11.19-5.21_15_min 1/13/2020  22:00      0         
11.19-5.21_15_min 1/13/2020  22:15      0         
11.19-5.21_15_min 1/13/2020  22:30      0         
11.19-5.21_15_min 1/13/2020  22:45      0         
11.19-5.21_15_min 1/13/2020  23:00      0         
11.19-5.21_15_min 1/13/2020  23:15      0         
11.19-5.21_15_min 1/13/2020  23:30      0         
11.19-5.21_15_min 1/13/2020  23:45      0         
11.19-5.21_15_min 1/14/2020  0:00       0         
11.19-5.21_15_min 1/14/2020  0:15       0         
11.19-5.21_15_min 1/14/2020  0:30       0         
11.19-5.21_15_min 1/14/2020  0:45       0         
11.19-5.21_15_min 1/14/2020  1:00       0         
11.19-5.21_15_min 1/14/2020  1:15       0         
11.19-5.21_15_min 1/14/2020  1:30       0         
11.19-5.21_15_min 1/14/2020  1:45       0         
11.19-5.21_15_min 1/14/2020  2:00       0         
11.19-5.21_15_min 1/14/2020  2:15       0         
11.19-5.21_15_min 1/14/2020  2:30       0         
11.19-5.21_15_min 1/14/2020  2:45       0         
11.19-5.21_15_min 1/14/2020  3:00       0         
11.19-5.21_15_min 1/14/2020  3:15       0         
11.19-5.21_15_min 1/14/2020  3:30       0         
11.19-5.21_15_min 1/14/2020  3:45       0         
11.19-5.21_15_min 1/14/2020  4:00       0         
11.19-5.21_15_min 1/14/2020  4:15       0         
11.19-5.21_15_min 1/14/2020  4:30       0         
11.19-5.21_15_min 1/14/2020  4:45       0         
11.19-5.21_15_min 1/14/2020  5:00       0         
11.19-5.21_15_min 1/14/2020  5:15       0         
11.19-5.21_15_min 1/14/2020  5:30       0         
11.19-5.21_15_min 1/14/2020  5:45       0         
11.19-5.21_15_min 1/14/2020  6:00       0         
11.19-5.21_15_min 1/14/2020  6:15       0         
11.19-5.21_15_min 1/14/2020  6:30       0         
11.19-5.21_15_min 1/14/2020  6:45       0         
11.19-5.21_15_min 1/14/2020  7:00       0         
11.19-5.21_15_min 1/14/2020  7:15       0         
11.19-5.21_15_min 1/14/2020  7:30       0         
11.19-5.21_15_min 1/14/2020  7:45       0         
11.19-5.21_15_min 1/14/2020  8:00       0         
11.19-5.21_15_min 1/14/2020  8:15       0         
11.19-5.21_15_min 1/14/2020  8:30       0         
11.19-5.21_15_min 1/14/2020  8:45       0         
11.19-5.21_15_min 1/14/2020  9:00       0         
11.19-5.21_15_min 1/14/2020  9:15       0         
11.19-5.21_15_min 1/14/2020  9:30       0         
11.19-5.21_15_min 1/14/2020  9:45       0         
11.19-5.21_15_min 1/14/2020  10:00      0         
11.19-5.21_15_min 1/14/2020  10:15      0         
11.19-5.21_15_min 1/14/2020  10:30      0         
11.19-5.21_15_min 1/14/2020  10:45      0         
11.19-5.21_15_min 1/14/2020  11:00      0         
11.19-5.21_15_min 1/14/2020  11:15      0         
11.19-5.21_15_min 1/14/2020  11:30      0         
11.19-5.21_15_min 1/14/2020  11:45      0         
11.19-5.21_15_min 1/14/2020  12:00      0         
11.19-5.21_15_min 1/14/2020  12:15      0         
11.19-5.21_15_min 1/14/2020  12:30      0         
11.19-5.21_15_min 1/14/2020  12:45      0         
11.19-5.21_15_min 1/14/2020  13:00      0         
11.19-5.21_15_min 1/14/2020  13:15      0         
11.19-5.21_15_min 1/14/2020  13:30      0         
11.19-5.21_15_min 1/14/2020  13:45      0         
11.19-5.21_15_min 1/14/2020  14:00      0         
11.19-5.21_15_min 1/14/2020  14:15      0         
11.19-5.21_15_min 1/14/2020  14:30      0         
11.19-5.21_15_min 1/14/2020  14:45      0         
11.19-5.21_15_min 1/14/2020  15:00      0         
11.19-5.21_15_min 1/14/2020  15:15      0         
11.19-5.21_15_min 1/14/2020  15:30      0         
11.19-5.21_15_min 1/14/2020  15:45      0         
11.19-5.21_15_min 1/14/2020  16:00      0         
11.19-5.21_15_min 1/14/2020  16:15      0         
11.19-5.21_15_min 1/14/2020  16:30      0         
11.19-5.21_15_min 1/14/2020  16:45      0         
11.19-5.21_15_min 1/14/2020  17:00      0         
11.19-5.21_15_min 1/14/2020  17:15      0         
11.19-5.21_15_min 1/14/2020  17:30      0         
11.19-5.21_15_min 1/14/2020  17:45      0         
11.19-5.21_15_min 1/14/2020  18:00      0         
11.19-5.21_15_min 1/14/2020  18:15      0.01      
11.19-5.21_15_min 1/14/2020  18:30      0         
11.19-5.21_15_min 1/14/2020  18:45      0         
11.19-5.21_15_min 1/14/2020  19:00      0         
11.19-5.21_15_min 1/14/2020  19:15      0         
11.19-5.21_15_min 1/14/2020  19:30      0         
11.19-5.21_15_min 1/14/2020  19:45      0         
11.19-5.21_15_min 1/14/2020  20:00      0         
11.19-5.21_15_min 1/14/2020  20:15      0         
11.19-5.21_15_min 1/14/2020  20:30      0         
11.19-5.21_15_min 1/14/2020  20:45      0         
11.19-5.21_15_min 1/14/2020  21:00      0         
11.19-5.21_15_min 1/14/2020  21:15      0         
11.19-5.21_15_min 1/14/2020  21:30      0         
11.19-5.21_15_min 1/14/2020  21:45      0.01      
11.19-5.21_15_min 1/14/2020  22:00      0         
11.19-5.21_15_min 1/14/2020  22:15      0         
11.19-5.21_15_min 1/14/2020  22:30      0         
11.19-5.21_15_min 1/14/2020  22:45      0         
11.19-5.21_15_min 1/14/2020  23:00      0         
11.19-5.21_15_min 1/14/2020  23:15      0         
11.19-5.21_15_min 1/14/2020  23:30      0         
11.19-5.21_15_min 1/14/2020  23:45      0         
11.19-5.21_15_min 1/15/2020  0:00       0         
11.19-5.21_15_min 1/15/2020  0:15       0         
11.19-5.21_15_min 1/15/2020  0:30       0         
11.19-5.21_15_min 1/15/2020  0:45       0         
11.19-5.21_15_min 1/15/2020  1:00       0         
11.19-5.21_15_min 1/15/2020  1:15       0         
11.19-5.21_15_min 1/15/2020  1:30       0         
11.19-5.21_15_min 1/15/2020  1:45       0         
11.19-5.21_15_min 1/15/2020  2:00       0         
11.19-5.21_15_min 1/15/2020  2:15       0         
11.19-5.21_15_min 1/15/2020  2:30       0         
11.19-5.21_15_min 1/15/2020  2:45       0         
11.19-5.21_15_min 1/15/2020  3:00       0         
11.19-5.21_15_min 1/15/2020  3:15       0         
11.19-5.21_15_min 1/15/2020  3:30       0         
11.19-5.21_15_min 1/15/2020  3:45       0         
11.19-5.21_15_min 1/15/2020  4:00       0         
11.19-5.21_15_min 1/15/2020  4:15       0         
11.19-5.21_15_min 1/15/2020  4:30       0         
11.19-5.21_15_min 1/15/2020  4:45       0         
11.19-5.21_15_min 1/15/2020  5:00       0         
11.19-5.21_15_min 1/15/2020  5:15       0         
11.19-5.21_15_min 1/15/2020  5:30       0         
11.19-5.21_15_min 1/15/2020  5:45       0         
11.19-5.21_15_min 1/15/2020  6:00       0         
11.19-5.21_15_min 1/15/2020  6:15       0         
11.19-5.21_15_min 1/15/2020  6:30       0         
11.19-5.21_15_min 1/15/2020  6:45       0         
11.19-5.21_15_min 1/15/2020  7:00       0         
11.19-5.21_15_min 1/15/2020  7:15       0         
11.19-5.21_15_min 1/15/2020  7:30       0         
11.19-5.21_15_min 1/15/2020  7:45       0         
11.19-5.21_15_min 1/15/2020  8:00       0         
11.19-5.21_15_min 1/15/2020  8:15       0         
11.19-5.21_15_min 1/15/2020  8:30       0         
11.19-5.21_15_min 1/15/2020  8:45       0         
11.19-5.21_15_min 1/15/2020  9:00       0         
11.19-5.21_15_min 1/15/2020  9:15       0         
11.19-5.21_15_min 1/15/2020  9:30       0         
11.19-5.21_15_min 1/15/2020  9:45       0         
11.19-5.21_15_min 1/15/2020  10:00      0         
11.19-5.21_15_min 1/15/2020  10:15      0         
11.19-5.21_15_min 1/15/2020  10:30      0         
11.19-5.21_15_min 1/15/2020  10:45      0         
11.19-5.21_15_min 1/15/2020  11:00      0         
11.19-5.21_15_min 1/15/2020  11:15      0         
11.19-5.21_15_min 1/15/2020  11:30      0         
11.19-5.21_15_min 1/15/2020  11:45      0         
11.19-5.21_15_min 1/15/2020  12:00      0         
11.19-5.21_15_min 1/15/2020  12:15      0         
11.19-5.21_15_min 1/15/2020  12:30      0         
11.19-5.21_15_min 1/15/2020  12:45      0         
11.19-5.21_15_min 1/15/2020  13:00      0         
11.19-5.21_15_min 1/15/2020  13:15      0         
11.19-5.21_15_min 1/15/2020  13:30      0         
11.19-5.21_15_min 1/15/2020  13:45      0         
11.19-5.21_15_min 1/15/2020  14:00      0         
11.19-5.21_15_min 1/15/2020  14:15      0         
11.19-5.21_15_min 1/15/2020  14:30      0         
11.19-5.21_15_min 1/15/2020  14:45      0         
11.19-5.21_15_min 1/15/2020  15:00      0         
11.19-5.21_15_min 1/15/2020  15:15      0         
11.19-5.21_15_min 1/15/2020  15:30      0         
11.19-5.21_15_min 1/15/2020  15:45      0         
11.19-5.21_15_min 1/15/2020  16:00      0         
11.19-5.21_15_min 1/15/2020  16:15      0         
11.19-5.21_15_min 1/15/2020  16:30      0         
11.19-5.21_15_min 1/15/2020  16:45      0         
11.19-5.21_15_min 1/15/2020  17:00      0         
11.19-5.21_15_min 1/15/2020  17:15      0         
11.19-5.21_15_min 1/15/2020  17:30      0         
11.19-5.21_15_min 1/15/2020  17:45      0         
11.19-5.21_15_min 1/15/2020  18:00      0         
11.19-5.21_15_min 1/15/2020  18:15      0         
11.19-5.21_15_min 1/15/2020  18:30      0         
11.19-5.21_15_min 1/15/2020  18:45      0         
11.19-5.21_15_min 1/15/2020  19:00      0         
11.19-5.21_15_min 1/15/2020  19:15      0         
11.19-5.21_15_min 1/15/2020  19:30      0         
11.19-5.21_15_min 1/15/2020  19:45      0         
11.19-5.21_15_min 1/15/2020  20:00      0         
11.19-5.21_15_min 1/15/2020  20:15      0         
11.19-5.21_15_min 1/15/2020  20:30      0         
11.19-5.21_15_min 1/15/2020  20:45      0         
11.19-5.21_15_min 1/15/2020  21:00      0         
11.19-5.21_15_min 1/15/2020  21:15      0         
11.19-5.21_15_min 1/15/2020  21:30      0         
11.19-5.21_15_min 1/15/2020  21:45      0         
11.19-5.21_15_min 1/15/2020  22:00      0         
11.19-5.21_15_min 1/15/2020  22:15      0         
11.19-5.21_15_min 1/15/2020  22:30      0         
11.19-5.21_15_min 1/15/2020  22:45      0         
11.19-5.21_15_min 1/15/2020  23:00      0         
11.19-5.21_15_min 1/15/2020  23:15      0         
11.19-5.21_15_min 1/15/2020  23:30      0         
11.19-5.21_15_min 1/15/2020  23:45      0         
11.19-5.21_15_min 1/16/2020  0:00       0         
11.19-5.21_15_min 1/16/2020  0:15       0         
11.19-5.21_15_min 1/16/2020  0:30       0         
11.19-5.21_15_min 1/16/2020  0:45       0         
11.19-5.21_15_min 1/16/2020  1:00       0         
11.19-5.21_15_min 1/16/2020  1:15       0         
11.19-5.21_15_min 1/16/2020  1:30       0         
11.19-5.21_15_min 1/16/2020  1:45       0         
11.19-5.21_15_min 1/16/2020  2:00       0.01      
11.19-5.21_15_min 1/16/2020  2:15       0         
11.19-5.21_15_min 1/16/2020  2:30       0         
11.19-5.21_15_min 1/16/2020  2:45       0         
11.19-5.21_15_min 1/16/2020  3:00       0         
11.19-5.21_15_min 1/16/2020  3:15       0         
11.19-5.21_15_min 1/16/2020  3:30       0         
11.19-5.21_15_min 1/16/2020  3:45       0         
11.19-5.21_15_min 1/16/2020  4:00       0         
11.19-5.21_15_min 1/16/2020  4:15       0.02      
11.19-5.21_15_min 1/16/2020  4:30       0.03      
11.19-5.21_15_min 1/16/2020  4:45       0.01      
11.19-5.21_15_min 1/16/2020  5:00       0.02      
11.19-5.21_15_min 1/16/2020  5:15       0.01      
11.19-5.21_15_min 1/16/2020  5:30       0.02      
11.19-5.21_15_min 1/16/2020  5:45       0.02      
11.19-5.21_15_min 1/16/2020  6:00       0         
11.19-5.21_15_min 1/16/2020  6:15       0         
11.19-5.21_15_min 1/16/2020  6:30       0         
11.19-5.21_15_min 1/16/2020  6:45       0         
11.19-5.21_15_min 1/16/2020  7:00       0.01      
11.19-5.21_15_min 1/16/2020  7:15       0         
11.19-5.21_15_min 1/16/2020  7:30       0         
11.19-5.21_15_min 1/16/2020  7:45       0         
11.19-5.21_15_min 1/16/2020  8:00       0         
11.19-5.21_15_min 1/16/2020  8:15       0         
11.19-5.21_15_min 1/16/2020  8:30       0.01      
11.19-5.21_15_min 1/16/2020  8:45       0         
11.19-5.21_15_min 1/16/2020  9:00       0         
11.19-5.21_15_min 1/16/2020  9:15       0         
11.19-5.21_15_min 1/16/2020  9:30       0         
11.19-5.21_15_min 1/16/2020  9:45       0         
11.19-5.21_15_min 1/16/2020  10:00      0         
11.19-5.21_15_min 1/16/2020  10:15      0         
11.19-5.21_15_min 1/16/2020  10:30      0         
11.19-5.21_15_min 1/16/2020  10:45      0         
11.19-5.21_15_min 1/16/2020  11:00      0         
11.19-5.21_15_min 1/16/2020  11:15      0         
11.19-5.21_15_min 1/16/2020  11:30      0         
11.19-5.21_15_min 1/16/2020  11:45      0         
11.19-5.21_15_min 1/16/2020  12:00      0         
11.19-5.21_15_min 1/16/2020  12:15      0         
11.19-5.21_15_min 1/16/2020  12:30      0         
11.19-5.21_15_min 1/16/2020  12:45      0         
11.19-5.21_15_min 1/16/2020  13:00      0         
11.19-5.21_15_min 1/16/2020  13:15      0         
11.19-5.21_15_min 1/16/2020  13:30      0         
11.19-5.21_15_min 1/16/2020  13:45      0         
11.19-5.21_15_min 1/16/2020  14:00      0         
11.19-5.21_15_min 1/16/2020  14:15      0         
11.19-5.21_15_min 1/16/2020  14:30      0         
11.19-5.21_15_min 1/16/2020  14:45      0         
11.19-5.21_15_min 1/16/2020  15:00      0         
11.19-5.21_15_min 1/16/2020  15:15      0         
11.19-5.21_15_min 1/16/2020  15:30      0         
11.19-5.21_15_min 1/16/2020  15:45      0         
11.19-5.21_15_min 1/16/2020  16:00      0         
11.19-5.21_15_min 1/16/2020  16:15      0         
11.19-5.21_15_min 1/16/2020  16:30      0         
11.19-5.21_15_min 1/16/2020  16:45      0         
11.19-5.21_15_min 1/16/2020  17:00      0         
11.19-5.21_15_min 1/16/2020  17:15      0         
11.19-5.21_15_min 1/16/2020  17:30      0         
11.19-5.21_15_min 1/16/2020  17:45      0         
11.19-5.21_15_min 1/16/2020  18:00      0         
11.19-5.21_15_min 1/16/2020  18:15      0         
11.19-5.21_15_min 1/16/2020  18:30      0         
11.19-5.21_15_min 1/16/2020  18:45      0         
11.19-5.21_15_min 1/16/2020  19:00      0         
11.19-5.21_15_min 1/16/2020  19:15      0         
11.19-5.21_15_min 1/16/2020  19:30      0         
11.19-5.21_15_min 1/16/2020  19:45      0         
11.19-5.21_15_min 1/16/2020  20:00      0         
11.19-5.21_15_min 1/16/2020  20:15      0         
11.19-5.21_15_min 1/16/2020  20:30      0         
11.19-5.21_15_min 1/16/2020  20:45      0         
11.19-5.21_15_min 1/16/2020  21:00      0         
11.19-5.21_15_min 1/16/2020  21:15      0         
11.19-5.21_15_min 1/16/2020  21:30      0         
11.19-5.21_15_min 1/16/2020  21:45      0         
11.19-5.21_15_min 1/16/2020  22:00      0         
11.19-5.21_15_min 1/16/2020  22:15      0         
11.19-5.21_15_min 1/16/2020  22:30      0         
11.19-5.21_15_min 1/16/2020  22:45      0         
11.19-5.21_15_min 1/16/2020  23:00      0         
11.19-5.21_15_min 1/16/2020  23:15      0         
11.19-5.21_15_min 1/16/2020  23:30      0         
11.19-5.21_15_min 1/16/2020  23:45      0         
11.19-5.21_15_min 1/17/2020  0:00       0         
11.19-5.21_15_min 1/17/2020  0:15       0         
11.19-5.21_15_min 1/17/2020  0:30       0         
11.19-5.21_15_min 1/17/2020  0:45       0         
11.19-5.21_15_min 1/17/2020  1:00       0         
11.19-5.21_15_min 1/17/2020  1:15       0         
11.19-5.21_15_min 1/17/2020  1:30       0         
11.19-5.21_15_min 1/17/2020  1:45       0         
11.19-5.21_15_min 1/17/2020  2:00       0         
11.19-5.21_15_min 1/17/2020  2:15       0         
11.19-5.21_15_min 1/17/2020  2:30       0         
11.19-5.21_15_min 1/17/2020  2:45       0         
11.19-5.21_15_min 1/17/2020  3:00       0         
11.19-5.21_15_min 1/17/2020  3:15       0         
11.19-5.21_15_min 1/17/2020  3:30       0         
11.19-5.21_15_min 1/17/2020  3:45       0         
11.19-5.21_15_min 1/17/2020  4:00       0         
11.19-5.21_15_min 1/17/2020  4:15       0         
11.19-5.21_15_min 1/17/2020  4:30       0         
11.19-5.21_15_min 1/17/2020  4:45       0         
11.19-5.21_15_min 1/17/2020  5:00       0         
11.19-5.21_15_min 1/17/2020  5:15       0         
11.19-5.21_15_min 1/17/2020  5:30       0         
11.19-5.21_15_min 1/17/2020  5:45       0         
11.19-5.21_15_min 1/17/2020  6:00       0         
11.19-5.21_15_min 1/17/2020  6:15       0         
11.19-5.21_15_min 1/17/2020  6:30       0         
11.19-5.21_15_min 1/17/2020  6:45       0         
11.19-5.21_15_min 1/17/2020  7:00       0         
11.19-5.21_15_min 1/17/2020  7:15       0         
11.19-5.21_15_min 1/17/2020  7:30       0         
11.19-5.21_15_min 1/17/2020  7:45       0         
11.19-5.21_15_min 1/17/2020  8:00       0         
11.19-5.21_15_min 1/17/2020  8:15       0         
11.19-5.21_15_min 1/17/2020  8:30       0         
11.19-5.21_15_min 1/17/2020  8:45       0         
11.19-5.21_15_min 1/17/2020  9:00       0         
11.19-5.21_15_min 1/17/2020  9:15       0         
11.19-5.21_15_min 1/17/2020  9:30       0         
11.19-5.21_15_min 1/17/2020  9:45       0         
11.19-5.21_15_min 1/17/2020  10:00      0         
11.19-5.21_15_min 1/17/2020  10:15      0         
11.19-5.21_15_min 1/17/2020  10:30      0         
11.19-5.21_15_min 1/17/2020  10:45      0         
11.19-5.21_15_min 1/17/2020  11:00      0         
11.19-5.21_15_min 1/17/2020  11:15      0         
11.19-5.21_15_min 1/17/2020  11:30      0         
11.19-5.21_15_min 1/17/2020  11:45      0         
11.19-5.21_15_min 1/17/2020  12:00      0         
11.19-5.21_15_min 1/17/2020  12:15      0         
11.19-5.21_15_min 1/17/2020  12:30      0         
11.19-5.21_15_min 1/17/2020  12:45      0         
11.19-5.21_15_min 1/17/2020  13:00      0         
11.19-5.21_15_min 1/17/2020  13:15      0         
11.19-5.21_15_min 1/17/2020  13:30      0         
11.19-5.21_15_min 1/17/2020  13:45      0         
11.19-5.21_15_min 1/17/2020  14:00      0         
11.19-5.21_15_min 1/17/2020  14:15      0         
11.19-5.21_15_min 1/17/2020  14:30      0         
11.19-5.21_15_min 1/17/2020  14:45      0         
11.19-5.21_15_min 1/17/2020  15:00      0         
11.19-5.21_15_min 1/17/2020  15:15      0         
11.19-5.21_15_min 1/17/2020  15:30      0         
11.19-5.21_15_min 1/17/2020  15:45      0         
11.19-5.21_15_min 1/17/2020  16:00      0         
11.19-5.21_15_min 1/17/2020  16:15      0         
11.19-5.21_15_min 1/17/2020  16:30      0         
11.19-5.21_15_min 1/17/2020  16:45      0         
11.19-5.21_15_min 1/17/2020  17:00      0         
11.19-5.21_15_min 1/17/2020  17:15      0         
11.19-5.21_15_min 1/17/2020  17:30      0         
11.19-5.21_15_min 1/17/2020  17:45      0         
11.19-5.21_15_min 1/17/2020  18:00      0         
11.19-5.21_15_min 1/17/2020  18:15      0         
11.19-5.21_15_min 1/17/2020  18:30      0         
11.19-5.21_15_min 1/17/2020  18:45      0         
11.19-5.21_15_min 1/17/2020  19:00      0         
11.19-5.21_15_min 1/17/2020  19:15      0         
11.19-5.21_15_min 1/17/2020  19:30      0         
11.19-5.21_15_min 1/17/2020  19:45      0         
11.19-5.21_15_min 1/17/2020  20:00      0         
11.19-5.21_15_min 1/17/2020  20:15      0         
11.19-5.21_15_min 1/17/2020  20:30      0         
11.19-5.21_15_min 1/17/2020  20:45      0         
11.19-5.21_15_min 1/17/2020  21:00      0         
11.19-5.21_15_min 1/17/2020  21:15      0         
11.19-5.21_15_min 1/17/2020  21:30      0         
11.19-5.21_15_min 1/17/2020  21:45      0         
11.19-5.21_15_min 1/17/2020  22:00      0         
11.19-5.21_15_min 1/17/2020  22:15      0         
11.19-5.21_15_min 1/17/2020  22:30      0         
11.19-5.21_15_min 1/17/2020  22:45      0         
11.19-5.21_15_min 1/17/2020  23:00      0         
11.19-5.21_15_min 1/17/2020  23:15      0         
11.19-5.21_15_min 1/17/2020  23:30      0         
11.19-5.21_15_min 1/17/2020  23:45      0         
11.19-5.21_15_min 1/18/2020  0:00       0         
11.19-5.21_15_min 1/18/2020  0:15       0         
11.19-5.21_15_min 1/18/2020  0:30       0         
11.19-5.21_15_min 1/18/2020  0:45       0         
11.19-5.21_15_min 1/18/2020  1:00       0         
11.19-5.21_15_min 1/18/2020  1:15       0         
11.19-5.21_15_min 1/18/2020  1:30       0         
11.19-5.21_15_min 1/18/2020  1:45       0         
11.19-5.21_15_min 1/18/2020  2:00       0         
11.19-5.21_15_min 1/18/2020  2:15       0         
11.19-5.21_15_min 1/18/2020  2:30       0         
11.19-5.21_15_min 1/18/2020  2:45       0         
11.19-5.21_15_min 1/18/2020  3:00       0         
11.19-5.21_15_min 1/18/2020  3:15       0         
11.19-5.21_15_min 1/18/2020  3:30       0         
11.19-5.21_15_min 1/18/2020  3:45       0         
11.19-5.21_15_min 1/18/2020  4:00       0         
11.19-5.21_15_min 1/18/2020  4:15       0         
11.19-5.21_15_min 1/18/2020  4:30       0         
11.19-5.21_15_min 1/18/2020  4:45       0         
11.19-5.21_15_min 1/18/2020  5:00       0         
11.19-5.21_15_min 1/18/2020  5:15       0         
11.19-5.21_15_min 1/18/2020  5:30       0         
11.19-5.21_15_min 1/18/2020  5:45       0         
11.19-5.21_15_min 1/18/2020  6:00       0         
11.19-5.21_15_min 1/18/2020  6:15       0         
11.19-5.21_15_min 1/18/2020  6:30       0         
11.19-5.21_15_min 1/18/2020  6:45       0         
11.19-5.21_15_min 1/18/2020  7:00       0         
11.19-5.21_15_min 1/18/2020  7:15       0         
11.19-5.21_15_min 1/18/2020  7:30       0         
11.19-5.21_15_min 1/18/2020  7:45       0         
11.19-5.21_15_min 1/18/2020  8:00       0         
11.19-5.21_15_min 1/18/2020  8:15       0         
11.19-5.21_15_min 1/18/2020  8:30       0         
11.19-5.21_15_min 1/18/2020  8:45       0         
11.19-5.21_15_min 1/18/2020  9:00       0         
11.19-5.21_15_min 1/18/2020  9:15       0         
11.19-5.21_15_min 1/18/2020  9:30       0
[truncated: 2,424,197 more chars]
